# Supplementary material
Source: PubMed Central journal article supplement (PMC2730114)

## **A Concise Asymmetric Synthesis of *cis*-2,6-Disubstituted *N*-Aryl Piperazines via Pd-Catalyzed Carboamination Reactions**

**Josephine S. Nakhla and John P. Wolfe\***

*Department of Chemistry, University of Michigan, 930 N. University Avenue, Ann Arbor, Michigan 48109-1055*

**Supporting Information (continued).**

**<sup>1</sup>H and <sup>13</sup>C NMR spectra for new compounds in Schemes 2–3 and Tables 1–2**

JSNVII-192-2-chiral

File: Proton

Pulse Sequence: s2pul

Solvent: cdcl3

Ambient temperature

Operator: jnsakha

INOVA-500 "Sn.Chem.LSA,UMich.Edu"

Relax. delay 0.100 sec

Pulse 45.0 degrees

Acq. time 3.000 sec

Width 7998.4 Hz

20 repetitions

OBSERVE H1, 499.9042604 MHz

DATA PROCESSING

Line broadening 0.2 Hz

Ft size 65536

Total time 1 min, 8 sec

Acquisition date: Dec 7 2006

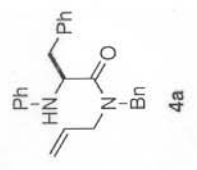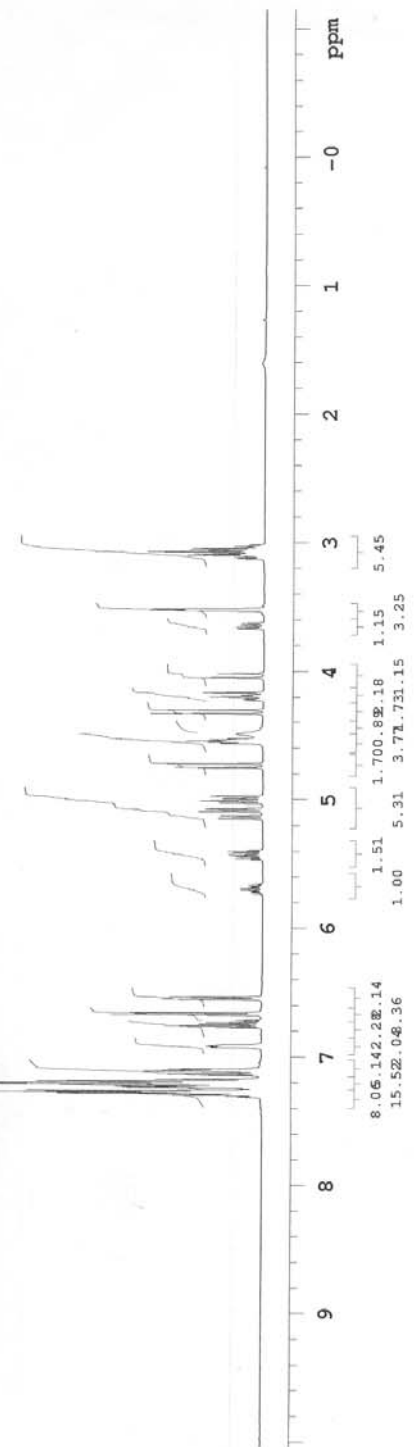

Standard Carbon

File: J5NVII-192-2-2-chiral-C13

Pulse Sequence: s2pnl

Solvent: cdcl3

Ambient temperature

Operator: Jnakhla

File: J5NVII-192-2-2-chiral-C13

INOVA-500 "Dy.Chem.LSA.UMich.Edu"

Relax. delay 0.100 sec

Pulse 45.0 degrees

Acq. time 1.300 sec

Width 30165.9 Hz

260 repetitions

OBSERVE C13, 125.7010267 MHz

DECOUPLE H1, 499.9067532 MHz

Power 31 dB

continuously on

WALTZ-16 modulated

DATA PROCESSING

Line broadening 1.0 Hz

FT size 131072

Total time 6 min, 9 sec

Acquisition date: Dec 11 2006

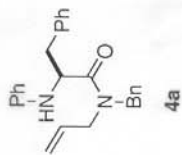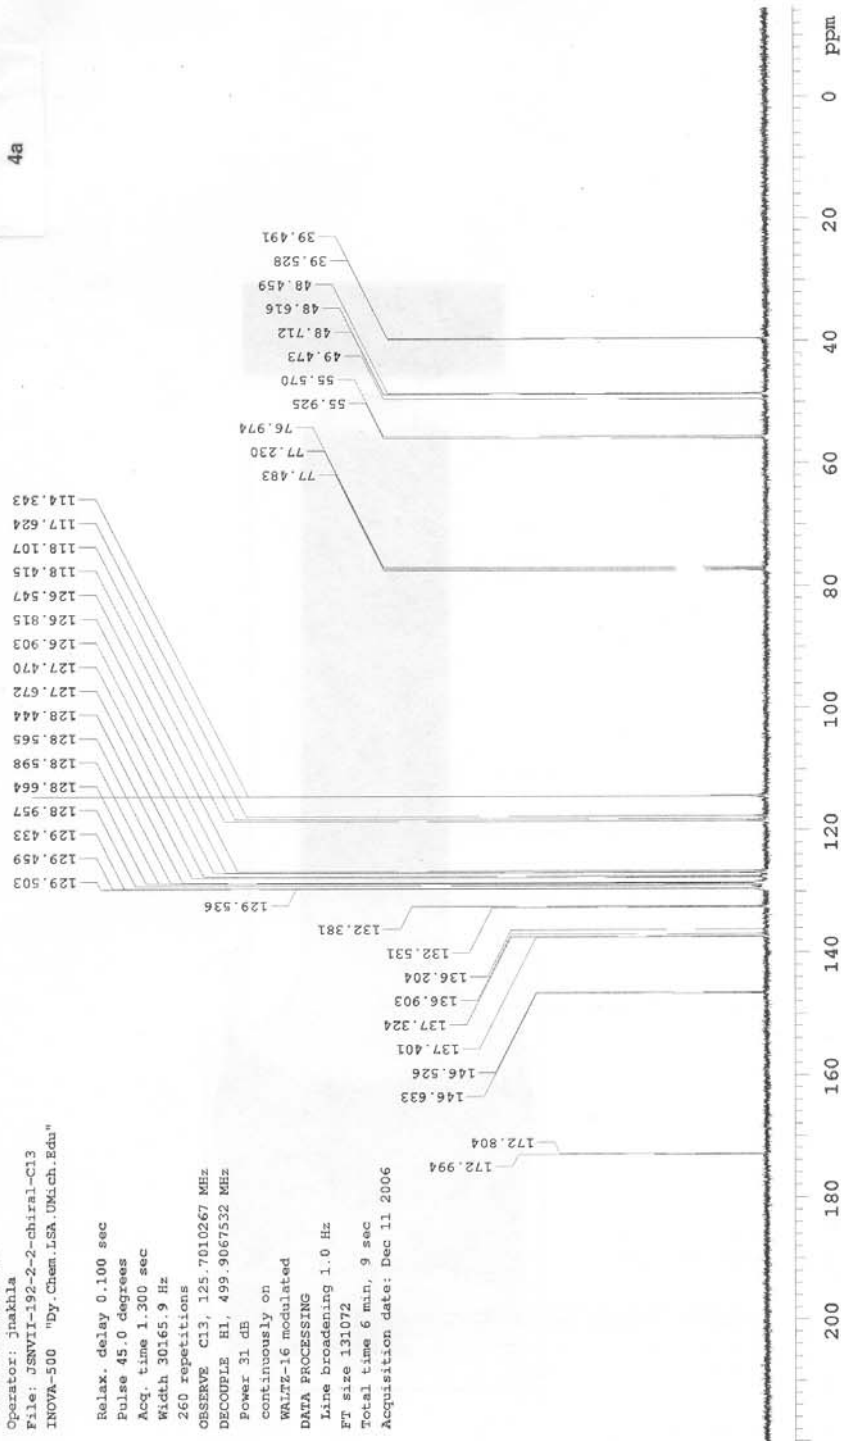

JSNVII-186-chiral-HI

File: Proton

Pulse Sequence: #2pul

Solvent: cdcl3

Ambient temperature

Operator: jnakhla

INOVA-500 "Sn.Chem.LSA.UMich.Edu"

Relax. delay 0.100 sec

Pulse 45.0 degrees

Acq. time 3.000 sec

Width 7998.4 Hz

48 repetitions

OBSERVE H1, 499.9042710 MHz

DATA PROCESSING

Line broadening 0.2 Hz

FT size 65536

Total time 2 min, 35 sec

Acquisition date: Nov 29 2006

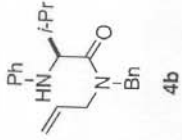

4b

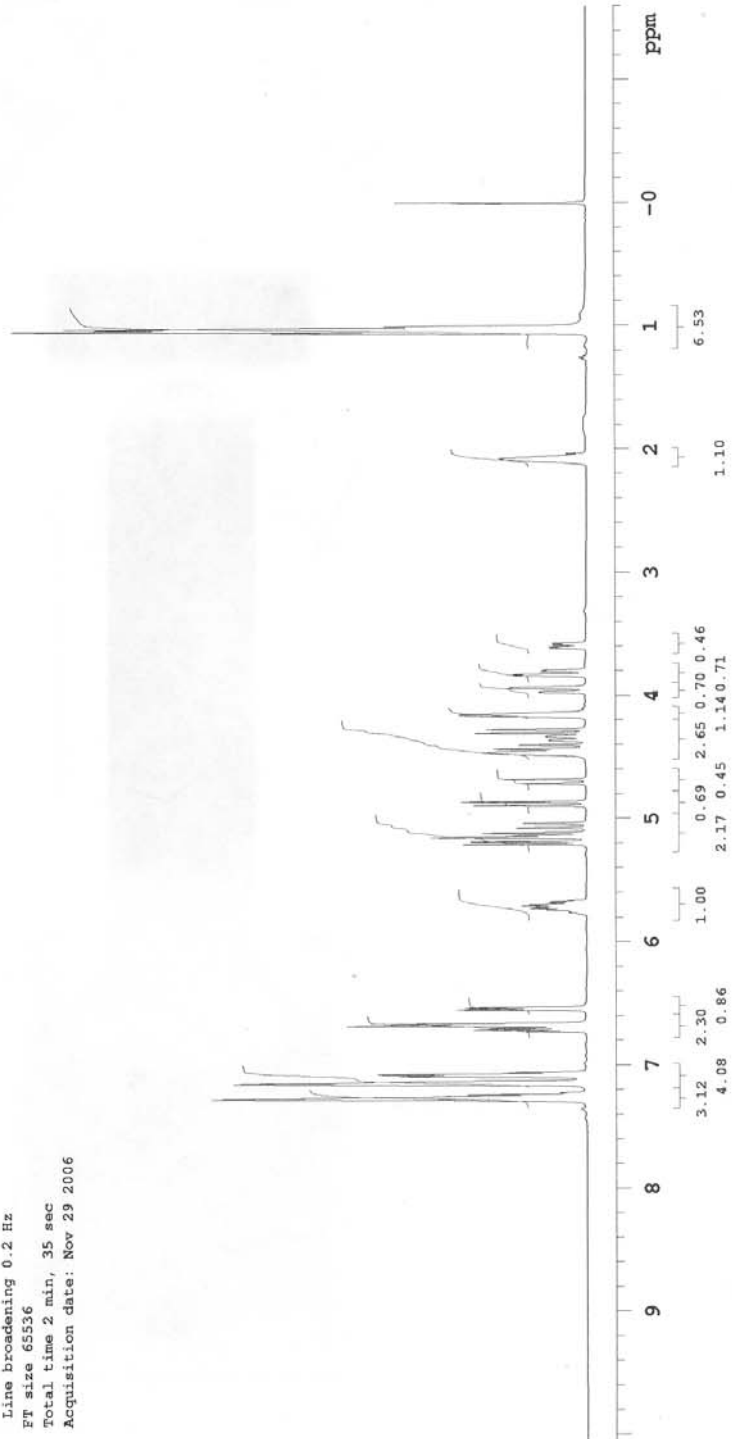

Standard Carbon

File: JSNVII-186-2-chiral-C13

Pulse Sequence: s2pul

Solvent: cdcl3

Ambient temperature

Operator: Jnakhla

File: JSNVII-186-2-chiral-C13

INOVA-500 "Dy. Chem. LSA, UMich. Edu"

Relax. delay 0.100 sec

Pulse 45.0 degrees

Acq. time 1.300 sec

Width 30165.9 Hz

676 repetitions

OBSERVE C13, 125.7010350 MHz

DECOUPLE H1, 499.9067532 MHz

Power 31 dB

continuously on

WALTZ-16 modulated

DATA PROCESSING

Line broadening 1.0 Hz

FT size 131072

Total time 15 min, 55 sec

Acquisition date: Nov 29 2006

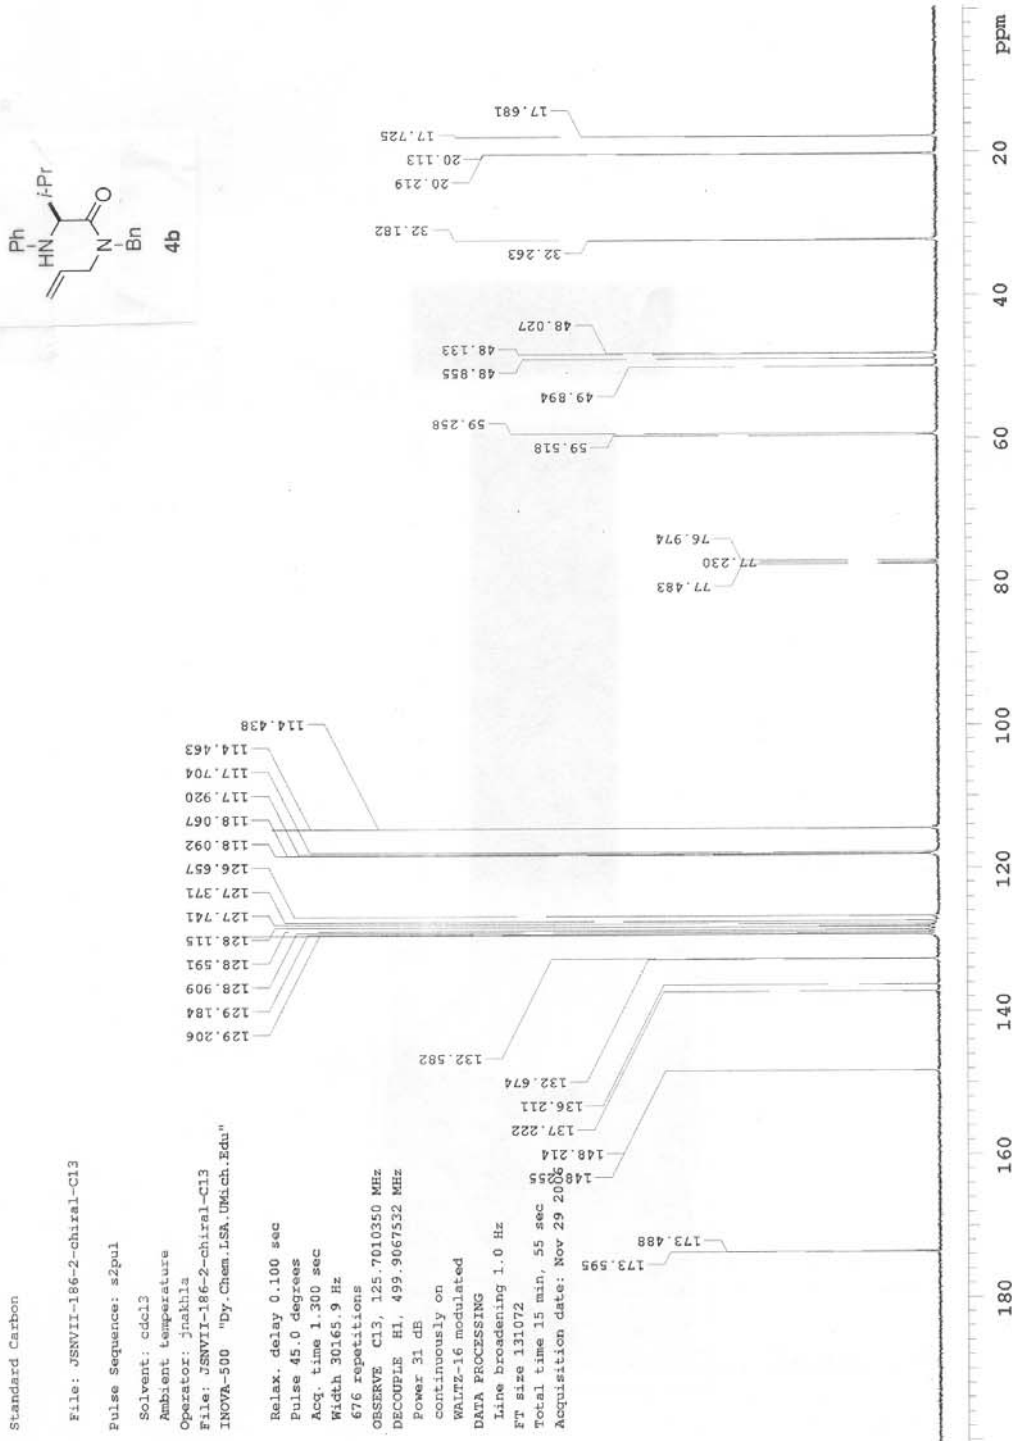

J5NVII-204-2-chiral

File: Proton

Pulse Sequence: s2pul

Solvent: cdcl3

Ambient temperature

Operator: jnakhla

INOVA-400 "Zr.Chem.LSA,UMich.Edu"

Relax. delay 0.500 sec

Pulse 45.0 degrees

Acq. time 3.000 sec

Width 6399.5 Hz

8 repetitions

OBSERVE HI, 399.9649493 MHz

DATA PROCESSING

Line broadening 0.2 Hz

FT size 65536

Total time 0 min, 35 sec

Acquisition date: Dec 14 2006

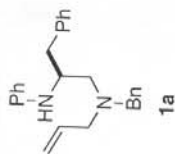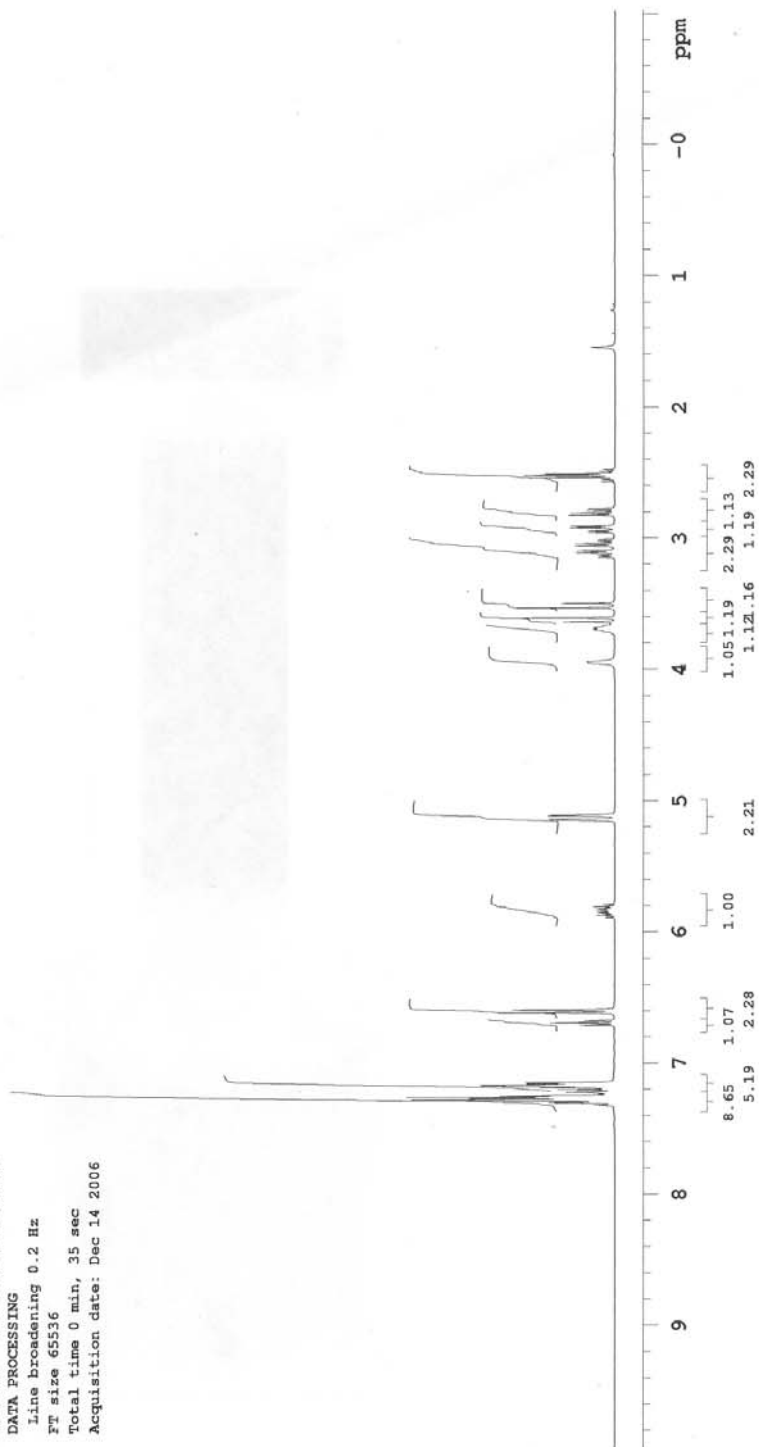

JSNVII-204-2-C13-chiral

File: Carbon

Pulse Sequence: s2pul

Solvent: cdcl3

Ambient temperature

Operator: jnakhla

INOVA-400 "Zr.Chem.USA.UMich.Edu"

Relax. delay 0.100 sec

Pulse 45.0 degrees

Acq. time 1.300 sec

Width 24140.0 Hz

292 repetitions

OBSERVE C13, 100.5712674 MHz

DECOUPLE H1, 399.9669644 MHz

Power 39 dB

continuously on

WALTZ-16 modulated

DATA PROCESSING

Line broadening 0.8 Hz

FT size 65536

Total time 6 min, 51 sec

Acquisition date: Dec 14 2006

| INDEX | FREQUENCY PPM | HEIGHT  |
|-------|---------------|---------|
| 1     | 14893.167     | 148.086 |
| 2     | 14013.553     | 139.340 |
| 3     | 13953.881     | 138.746 |
| 4     | 13631.946     | 135.545 |
| 5     | 13033.749     | 129.597 |
| 6     | 13014.595     | 129.407 |
| 7     | 12992.495     | 129.187 |
| 8     | 12916.615     | 128.432 |
| 9     | 12791.377     | 127.187 |
| 10    | 12705.184     | 126.330 |
| 11    | 11867.562     | 118.002 |
| 12    | 11801.259     | 117.342 |
| 13    | 11407.864     | 113.431 |
| 14    | 5901.071      | 58.676  |
| 15    | 5772.150      | 57.394  |
| 16    | 5723.528      | 56.910  |
| 17    | 5263.094      | 52.332  |
| 18    | 3943.673      | 39.213  |

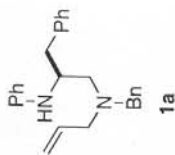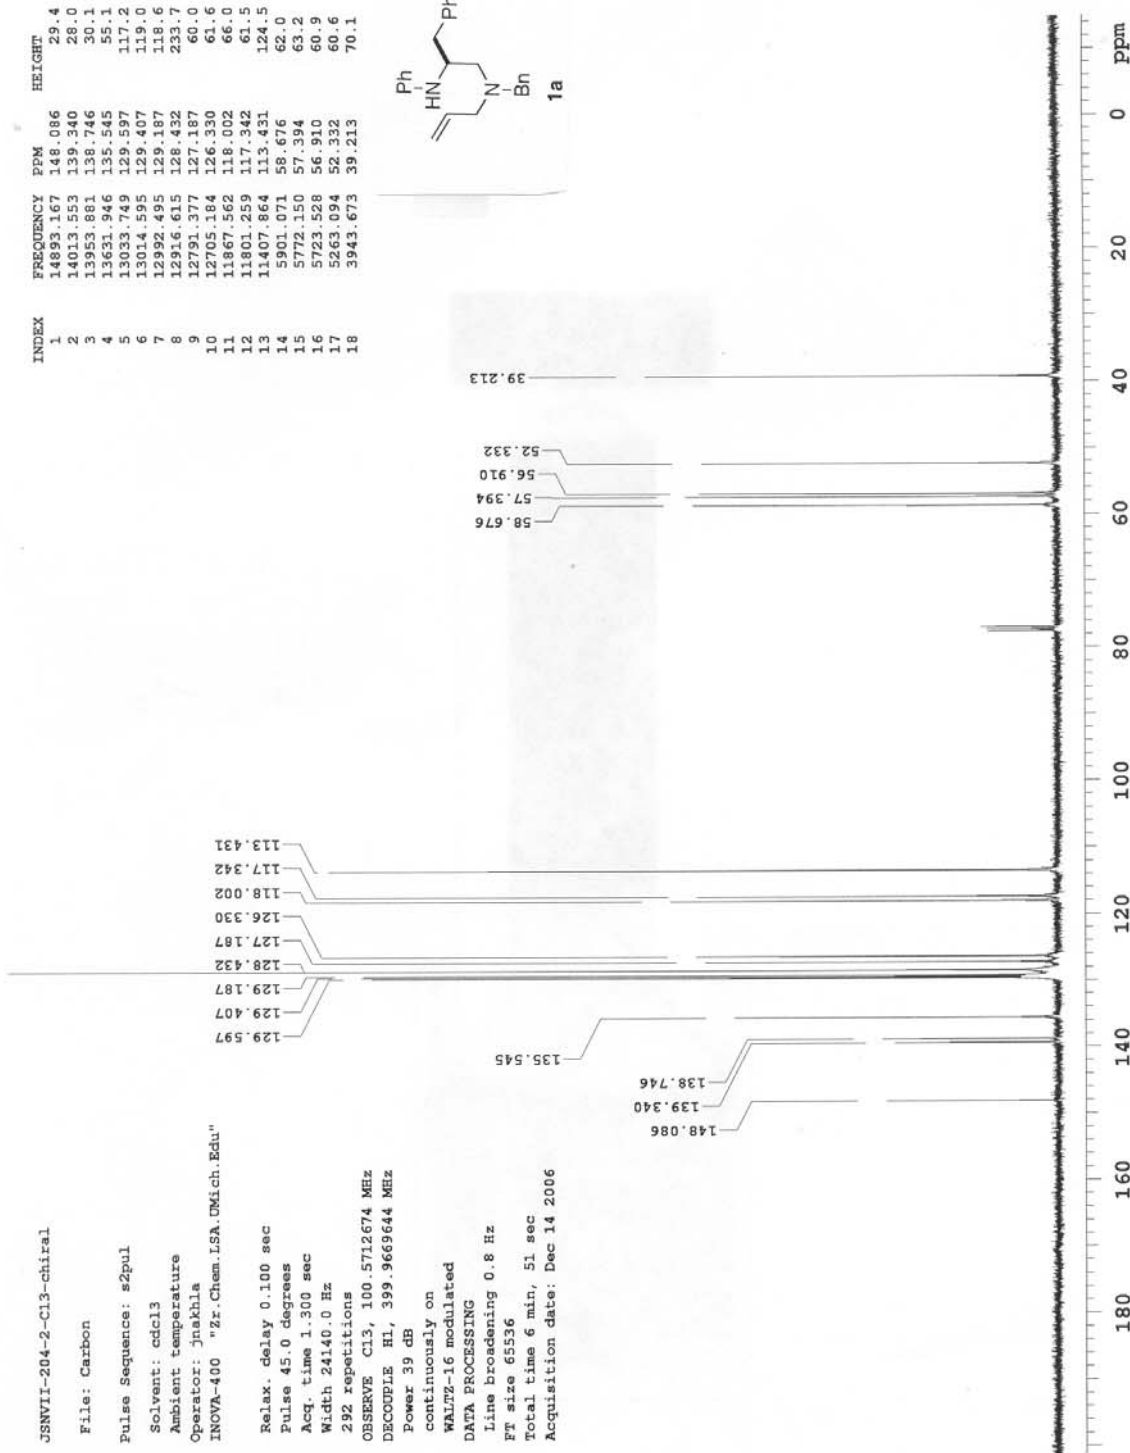

Data: C:\CLASS-VP\Enterprise\Projects\Default\Data\Nakhla Data\New Folder\JSNVII-198-2-rac-jan1807-3.dat

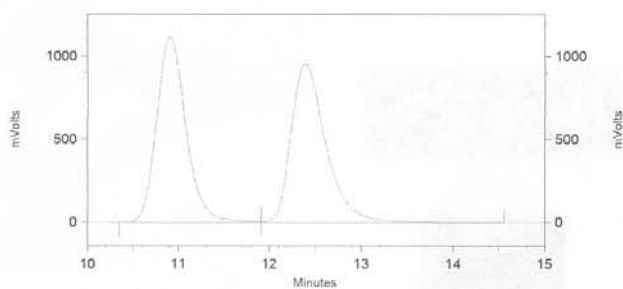

OD-H  
0.5% IPA/Hex  
0.5 mL/min

Detector 1 Ch2-254nm  
Results

| Retention Time | Area     | Area Percent |
|----------------|----------|--------------|
| 10.908         | 24925024 | 49.652       |
| 12.383         | 25274013 | 50.348       |
| Totals         | 50199037 | 100.000      |

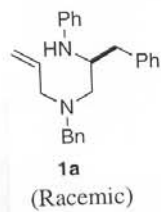

OD-H  
0.5% IPA/Hex  
0.5 mL/min



Data: C:\CLASS-VP\Enterprise\Projects\Default\Data\Nakhla Data\New Folder\JSNVIII-35-2-chiralpure.dat

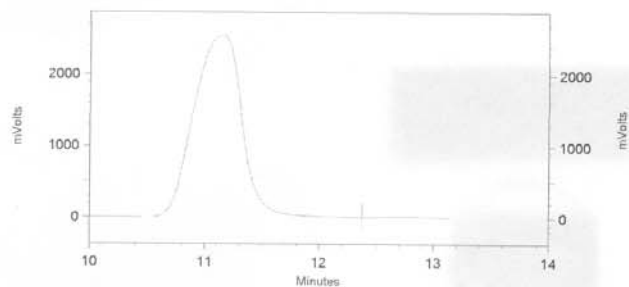

Detector 1 Ch2-254nm  
Results

| Retention Time | Area     | Area Percent |
|----------------|----------|--------------|
| 11.150         | 73900303 | 98.912       |
| 12.717         | 812861   | 1.088        |
| Totals         | 74713164 | 100.000      |

OD-H  
0.5% IPA/Hex  
0.5 mL/min

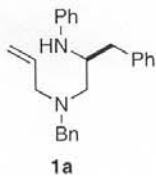

OD-H  
0.5% IPA/Hex  
0.5 mL/min

## Standard Proton

File: JSNVII-189-2-chiral

Pulse Sequence: s2pul

Solvent: cdcl3

Ambient temperature

Operator: jmkhla

File: JSNVII-189-2-chiral

INOVA-500 "Py. Chem. ISA, UM.Ch. Edu"

Relax. delay 0.100 sec

Pulse 45.0 degrees

Acq. time 3.000 sec

Width 7998.4 Hz

8 repetitions

OBSERVE H1, 499.9042606 MHz

DATA PROCESSING

Line broadening 0.2 Hz

FT size 65136

Total time 0 min, 31 sec

Acquisition date: Dec 10 2006

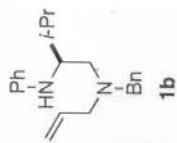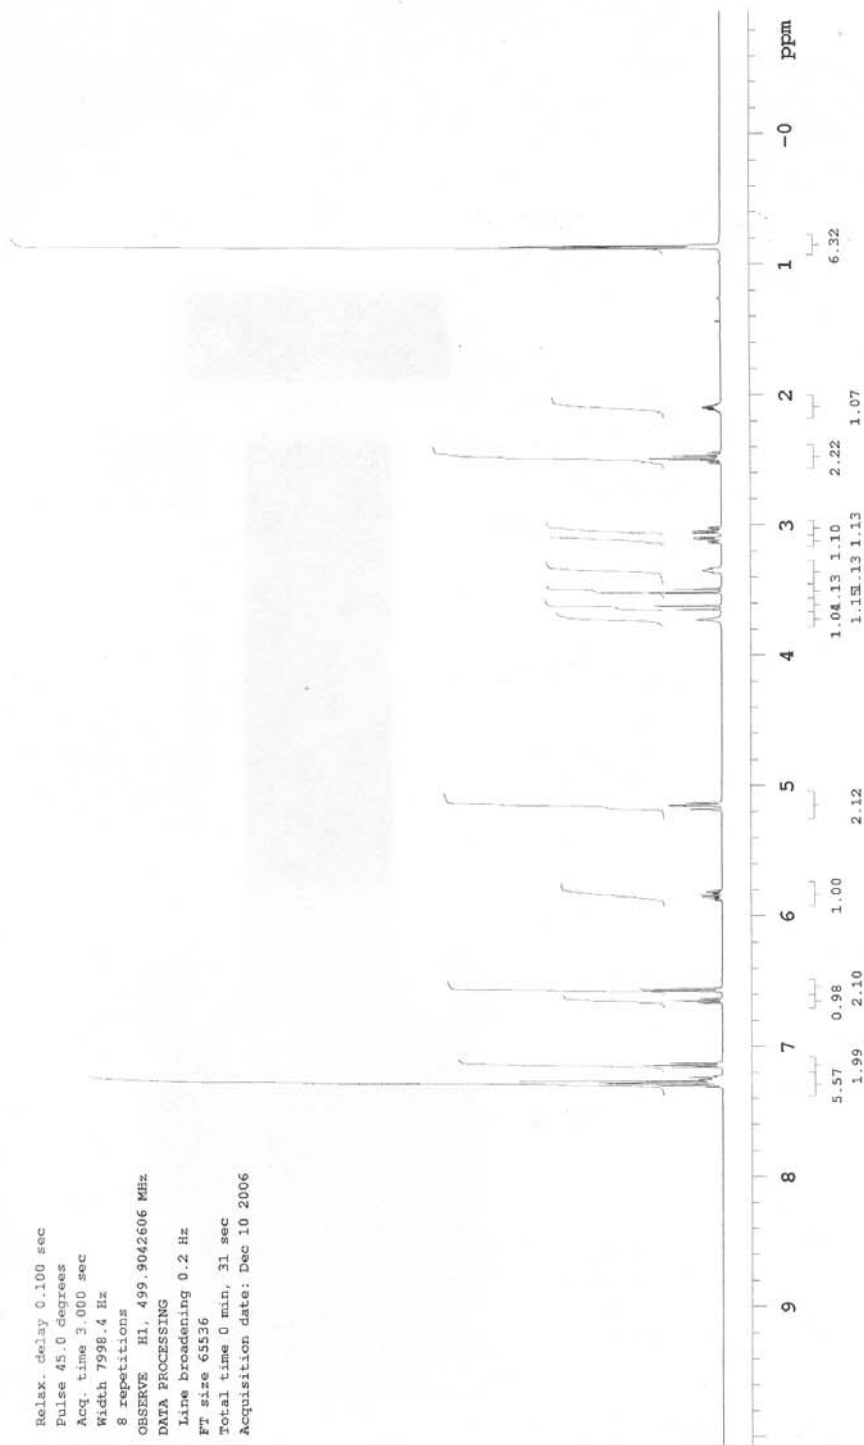

Std Carbon

File: JSNVII-41-2-C13

Pulse Sequence: s2pul

Solvent: cdcl3

Ambient temperature

Operator: jnakhla

File: JSNVII-41-2-C13

INOVA-400 "Dy.Chem.LSA.UMich.Edu"

Relax. delay 0.100 sec

Pulse 45.0 degrees

Acq. time 1.300 sec

Width 24140.0 Hz

440 repetitions

OBSERVE C13, 100.5712512 MHz

DECOUPLE H1, 399.9669644 MHz

Power 39 dB

continuously on

WALTZ-16 modulated

DATA PROCESSING

Line broadening 0.8 Hz

FT size 65536

Total time 10 min, 20 sec

Acquisition date: Dec 2 2006

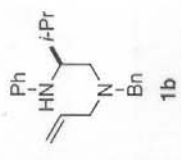

| INDEX | FREQUENCY PPM | HEIGHT  |
|-------|---------------|---------|
| 1     | 14994.093     | 149.089 |
| 2     | 14051.124     | 139.713 |
| 3     | 13673.936     | 135.963 |
| 4     | 13010.911     | 129.370 |
| 5     | 12992.493     | 129.187 |
| 6     | 12914.404     | 128.410 |
| 7     | 12787.692     | 127.151 |
| 8     | 11851.353     | 117.840 |
| 9     | 11749.689     | 116.830 |
| 10    | 11387.236     | 113.226 |
| 11    | 7799.532      | 77.552  |
| 12    | 7767.118      | 77.230  |
| 13    | 7735.440      | 76.915  |
| 14    | 5923.171      | 58.895  |
| 15    | 5780.989      | 57.482  |
| 16    | 5623.336      | 55.914  |
| 17    | 5462.737      | 54.317  |
| 18    | 2967.552      | 29.507  |
| 19    | 1872.087      | 18.615  |
| 20    | 1765.266      | 17.552  |

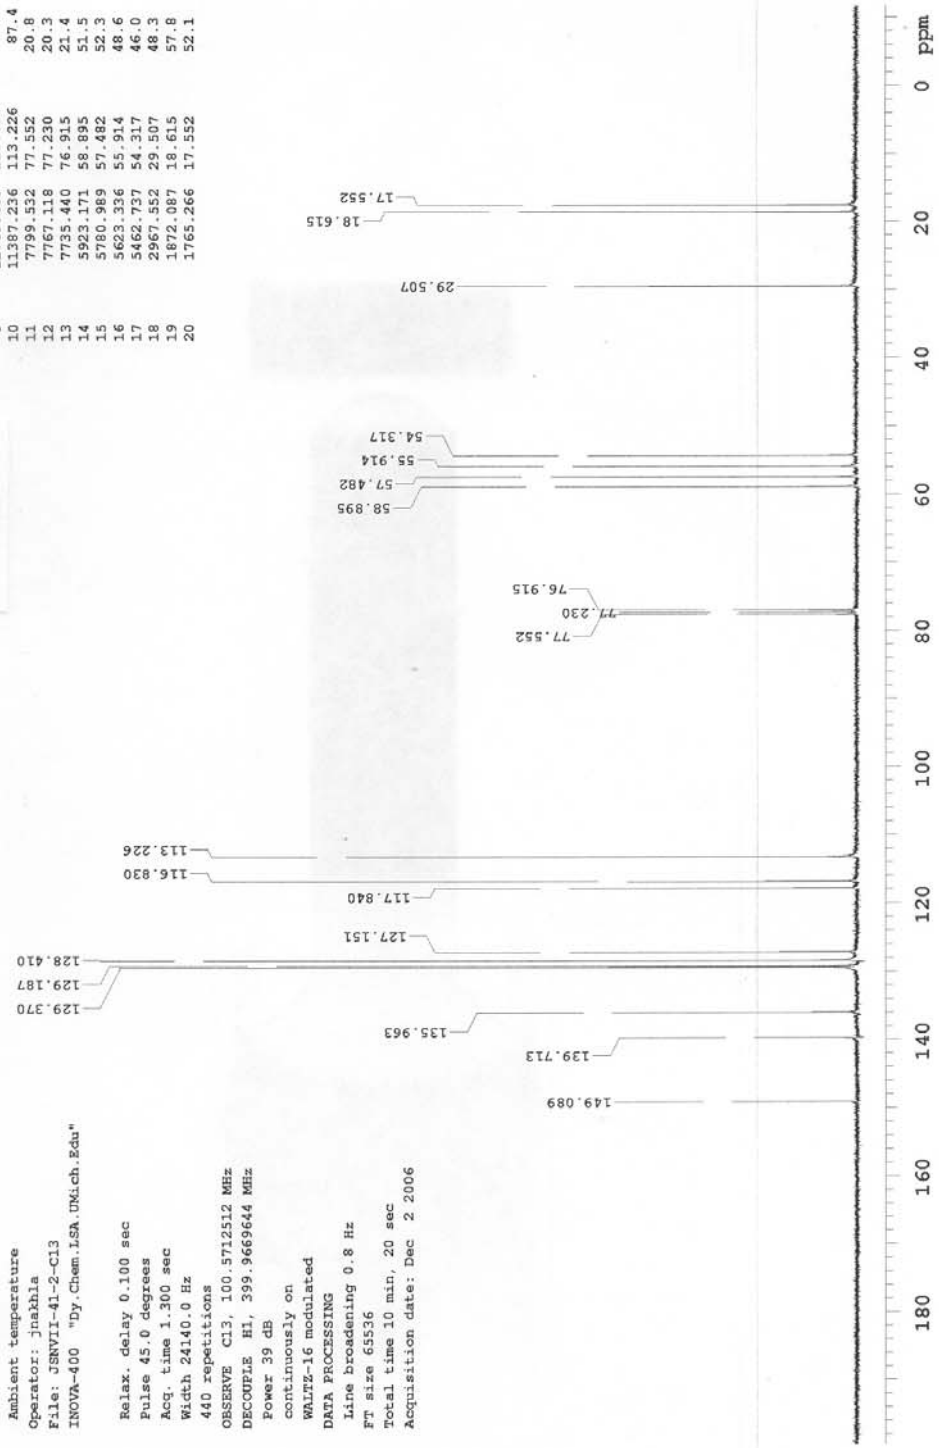

Data: C:\CLASS-VP\Enterprise\Projects\Default\Data\Nakhla Data\New Folder\JSNVIII-1-2-rac-9.dat

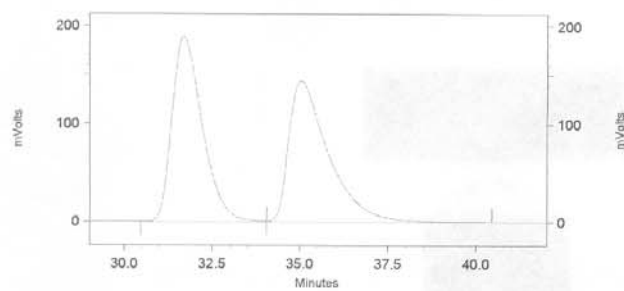

OD-H  
0.1% IPA/Hex  
0.2 mL/min

Detector 1 Ch2-254nm  
Results

| Retention Time | Area     | Area Percent |
|----------------|----------|--------------|
| 31.683         | 11357604 | 49.645       |
| 35.008         | 11428075 | 50.155       |
| Totals         | 22785679 | 100.000      |

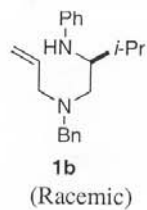

OD-H  
0.1% IPA/Hex  
0.2 mL/min

Data: C:\CLASS-VP\Enterprise\Projects\Default\Data\Nakhla Data\New Folder\JSNVIII-1-2-chiral-2-diltuted-2.dat

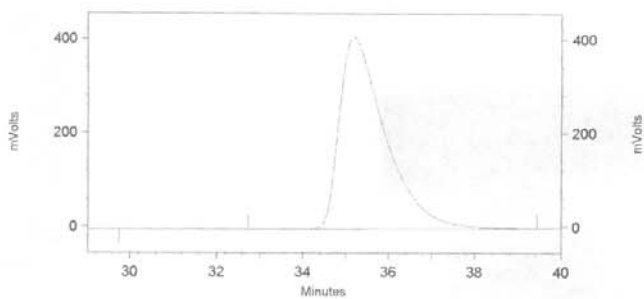

OD-H  
0.1% IPA/Hex  
0.2 mL/min

Detector 1 Ch2-254nm  
Results

| Retention Time | Area     | Area Percent |
|----------------|----------|--------------|
| 31.650         | 11634    | 0.038        |
| 35.175         | 30236956 | 99.962       |
| Totals         | 30248590 | 100.000      |

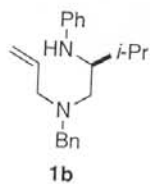

OD-H  
0.1% IPA/Hex  
0.2 mL/min

Std proton

File: JSNVIII-96-2-H1

Pulse Sequence: s2pul

Solvent: cdcl3

Ambient temperature

Operator: Jnakhla

File: JSNVIII-96-2-H1

INOVA-400 "Py.Chem.USA,UMich.Edu"

Relax. delay 0.500 sec

Pulse 45.0 degrees

Acq. time 3.000 sec

Width 6399.5 Hz

8 repetitions

OBSERVE H1, 399.9649481 MHz

DATA PROCESSING

Line broadening 0.2 Hz

FT size 65536

Total time 0 min, 35 sec

Acquisition date: May 12 2007

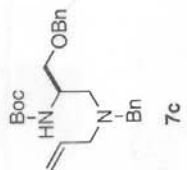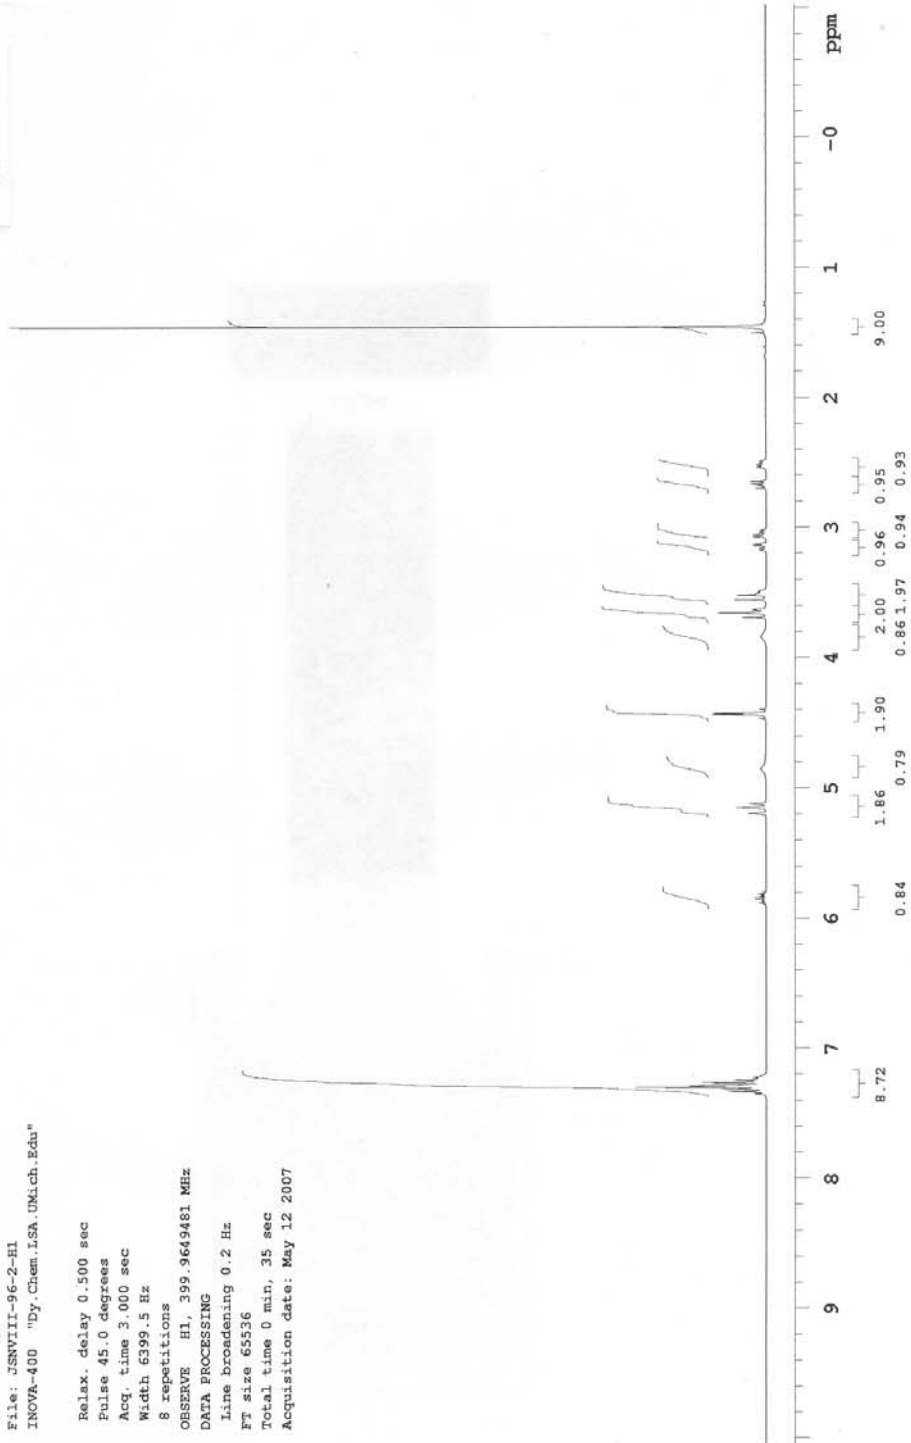

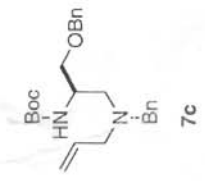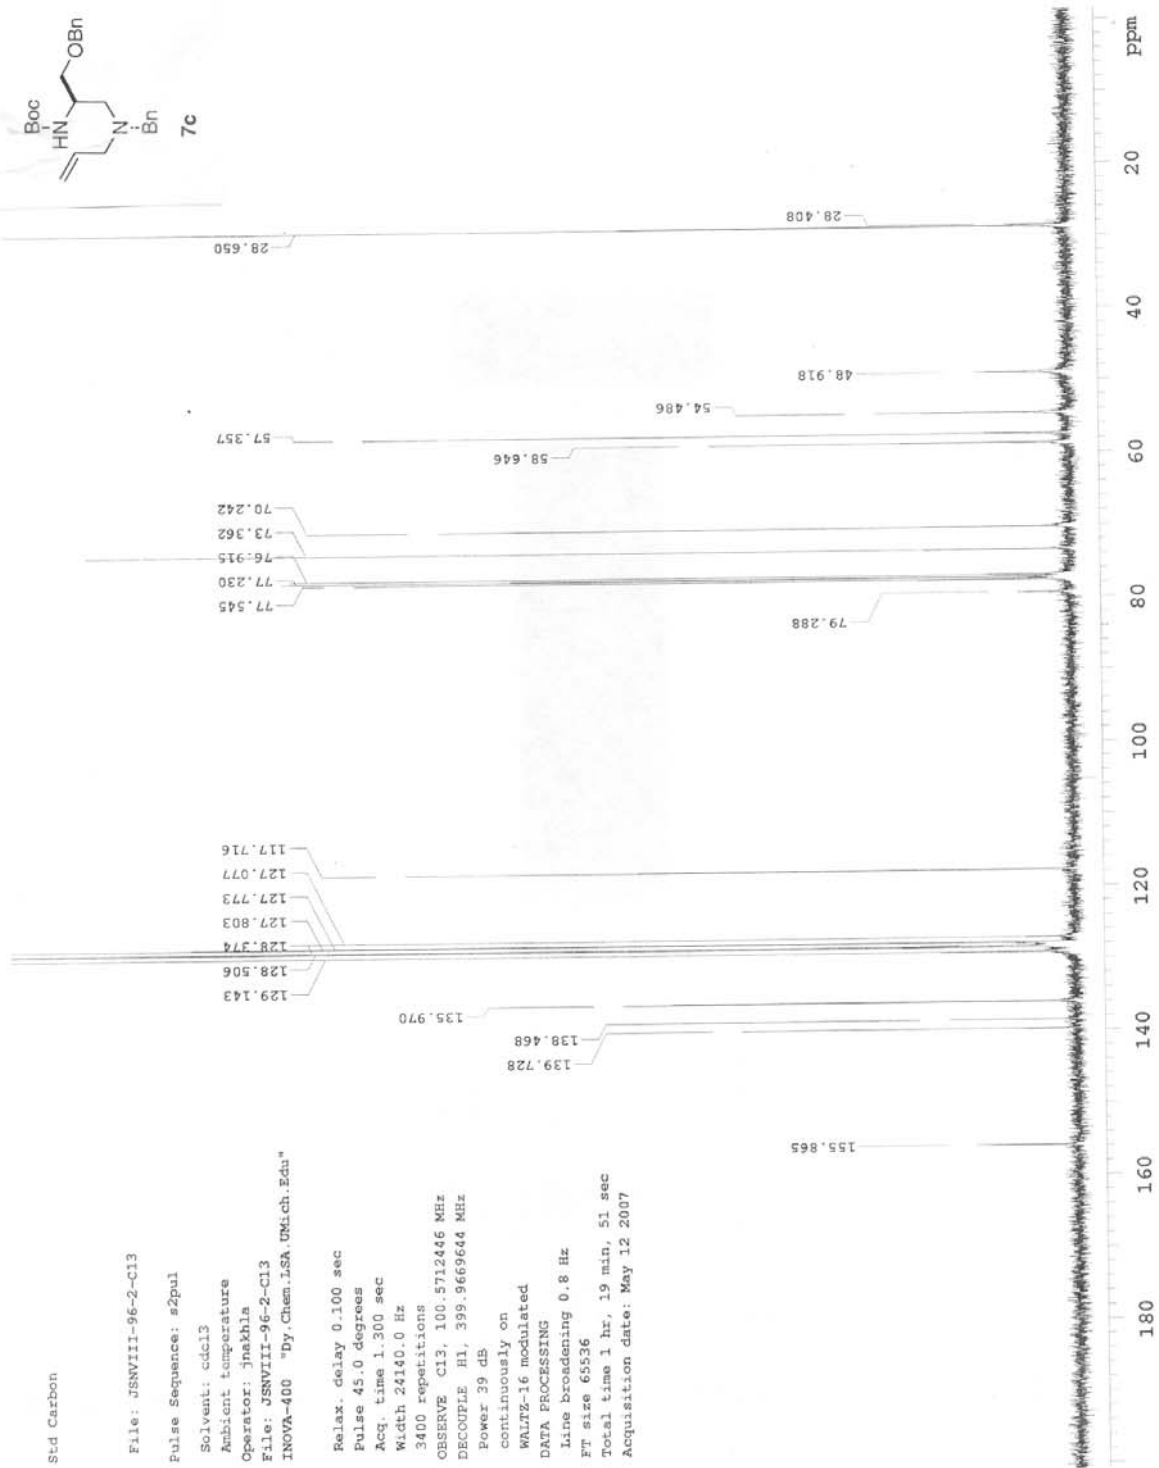

Std Carbon

File: JSNVIII-96-2-C13

Pulse Sequence: #2pul

Solvent: cdcl3

Ambient temperature

Operator: jnaxhla

File: JSNVIII-96-2-C13

INOVA-400 "Dy.Chem.LSA,UMi.ch.Edu"

Relax. delay 0.100 sec

Pulse 45.0 degrees

Acq. time 1.300 sec

Width 24140.0 Hz

3400 repetitions

OBSERVE C13, 100.5712446 MHz

DECOUPLE H1, 399.9669644 MHz

Power 39 dB

continuously on

WALTZ-16 modulated

DATA PROCESSING

Line broadening 0.8 Hz

FT size 65536

Total time 1 hr, 19 min, 51 sec

Acquisition date: May 12 2007

JENVIII-147-2-bocaminechiral

File: Proton

Pulse Sequence: s2pul

Solvent: cdcl3

Ambient temperature

Operator: jnakhla

INOVA-500 "Sn.Chem.LSA.UMich.Edu"

Relax. delay 0.100 sec

Pulse 45.0 degrees

Acq. time 3.000 sec

Width 7998.4 Hz

24 repetitions

OBSERVE H1, 499.9042604 MHz

DATA PROCESSING

Line broadening 0.2 Hz

FT size 65536

Total time 1 min, 20 sec

Acquisition date: Apr 30 2007

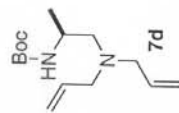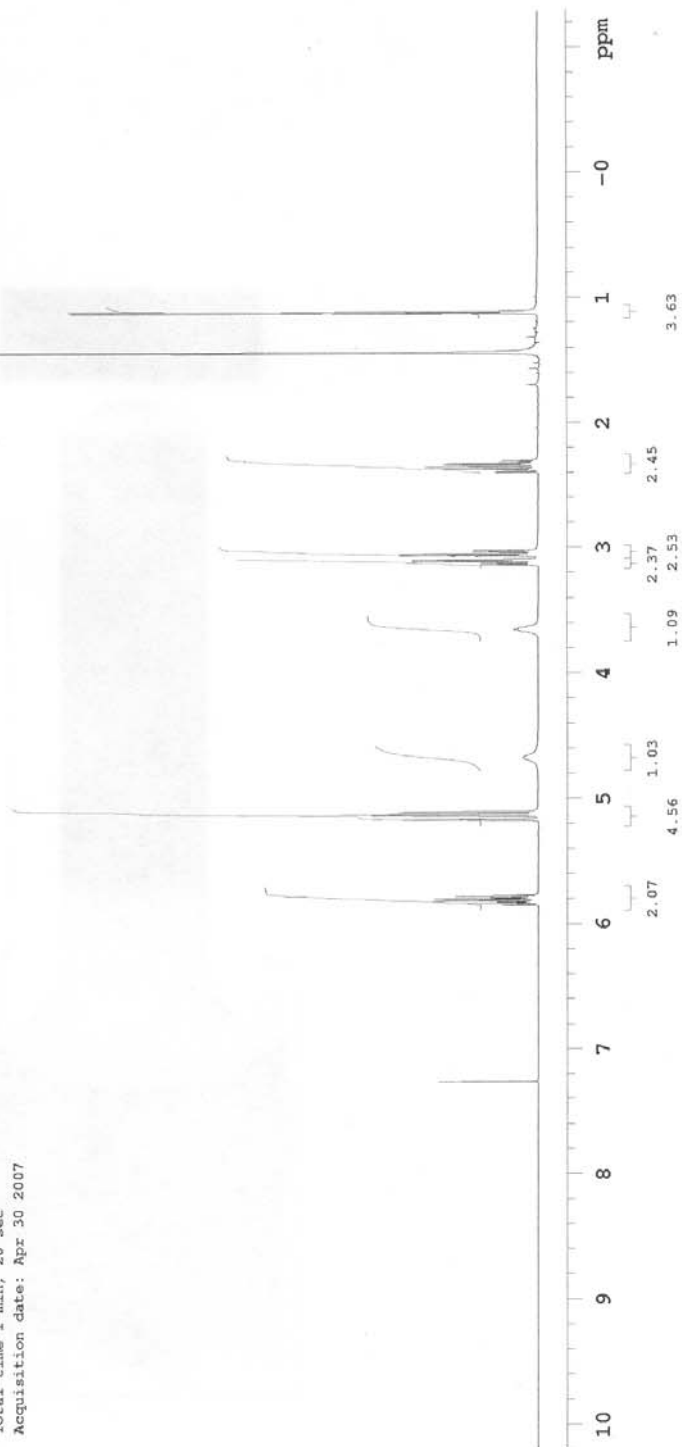



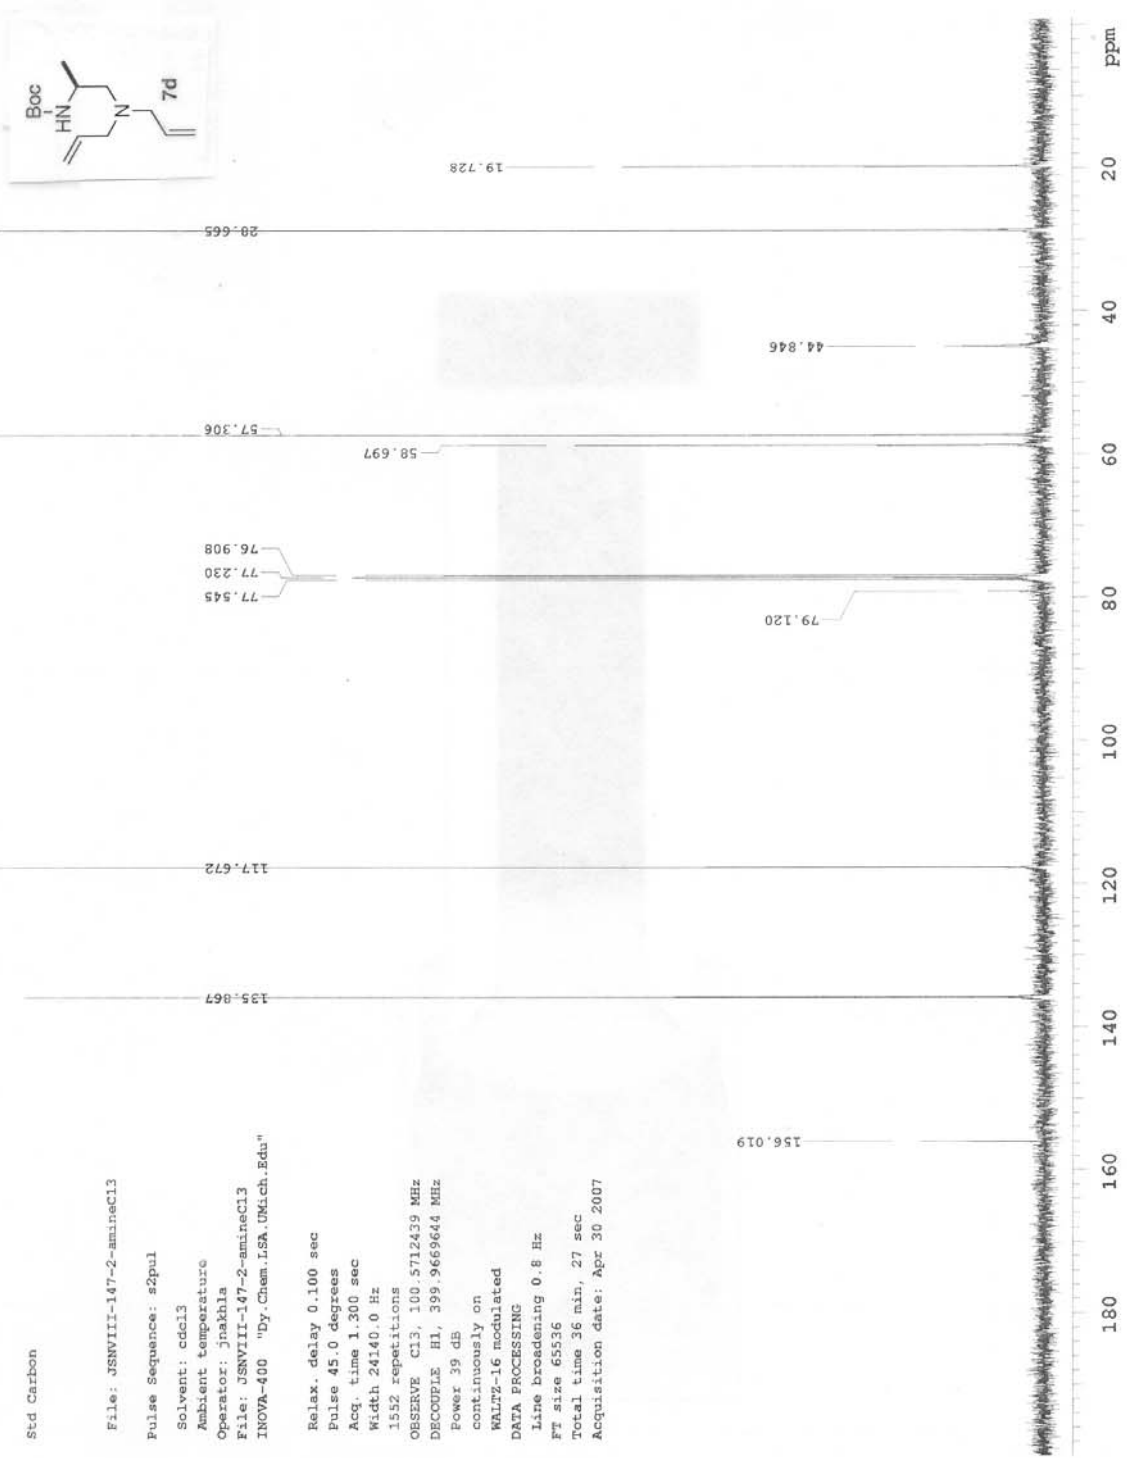

Std Carbon

File: JSNVIII-147-2-amineCl3

Pulse Sequence: s2pul

Solvent: cdcl3

Ambient temperature

Operator: Jnakhla

File: JSNVIII-147-2-amineCl3

INOVA-400 "Dy.Chem.LSA.UMich.Edu"

Relax. delay 0.100 sec

Pulse 45.0 degrees

Acq. time 1.300 sec

Width 24140.0 Hz

1552 repetitions

OBSERVE C13, 100.5712439 MHz

DECOUPLE H1, 399.9669644 MHz

Power 39 dB

continuously on

WALTZ-16 modulated

DATA PROCESSING

Line broadening 0.8 Hz

FT size 65536

Total time 36 min, 27 sec

Acquisition date: Apr 30 2007

## Std proton

File: JSNVIII-143-2  
 Pulse Sequence: s2pul  
 Solvent: cdcl3  
 Ambient temperature  
 Operator: jnakhla  
 File: JSNVIII-143-2  
 INOVA-400 "Kr.chem.lsa.umich.edu"

Relax. delay 0.500 sec  
 Pulse 45.0 degrees  
 Acq. time 3.000 sec  
 Width 6399.5 Hz  
 4 repetitions  
 OBSERVE H1, 399.9649484 MHz  
 DATA PROCESSING  
 Line broadening 0.2 Hz  
 FT size 65536  
 Total time 0 min, 21 sec  
 Acquisition date: Apr 26 2007

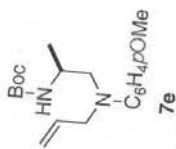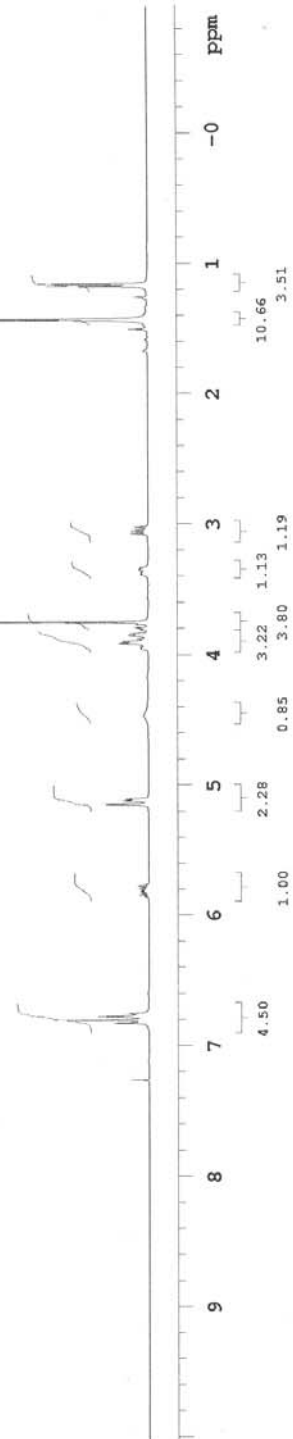

Std Carbon

File: JSNVIII-143-2-C13

Pulse Sequence: s2pul

Solvent: cdcl3

Ambient temperature

Operator: jnakhla

File: JSNVIII-143-2-C13

INOVA-400 "Dy.Chem.LSA,UMich.Eds"

Relax. delay 0.100 sec

Pulse 45.0 degrees

Acq. time 1.300 sec

Width 24140.0 Hz

856 repetitions

OBSERVE C13, 100.5712461 MHz

DECOUPLE H1, 399.9669644 MHz

Power 39 dB

continuously on

WALTZ-16 modulated

DATA PROCESSING

Line broadening 0.8 Hz

FT size 65536

Total time 20 min, 6 sec

Acquisition date: Apr 26 2007

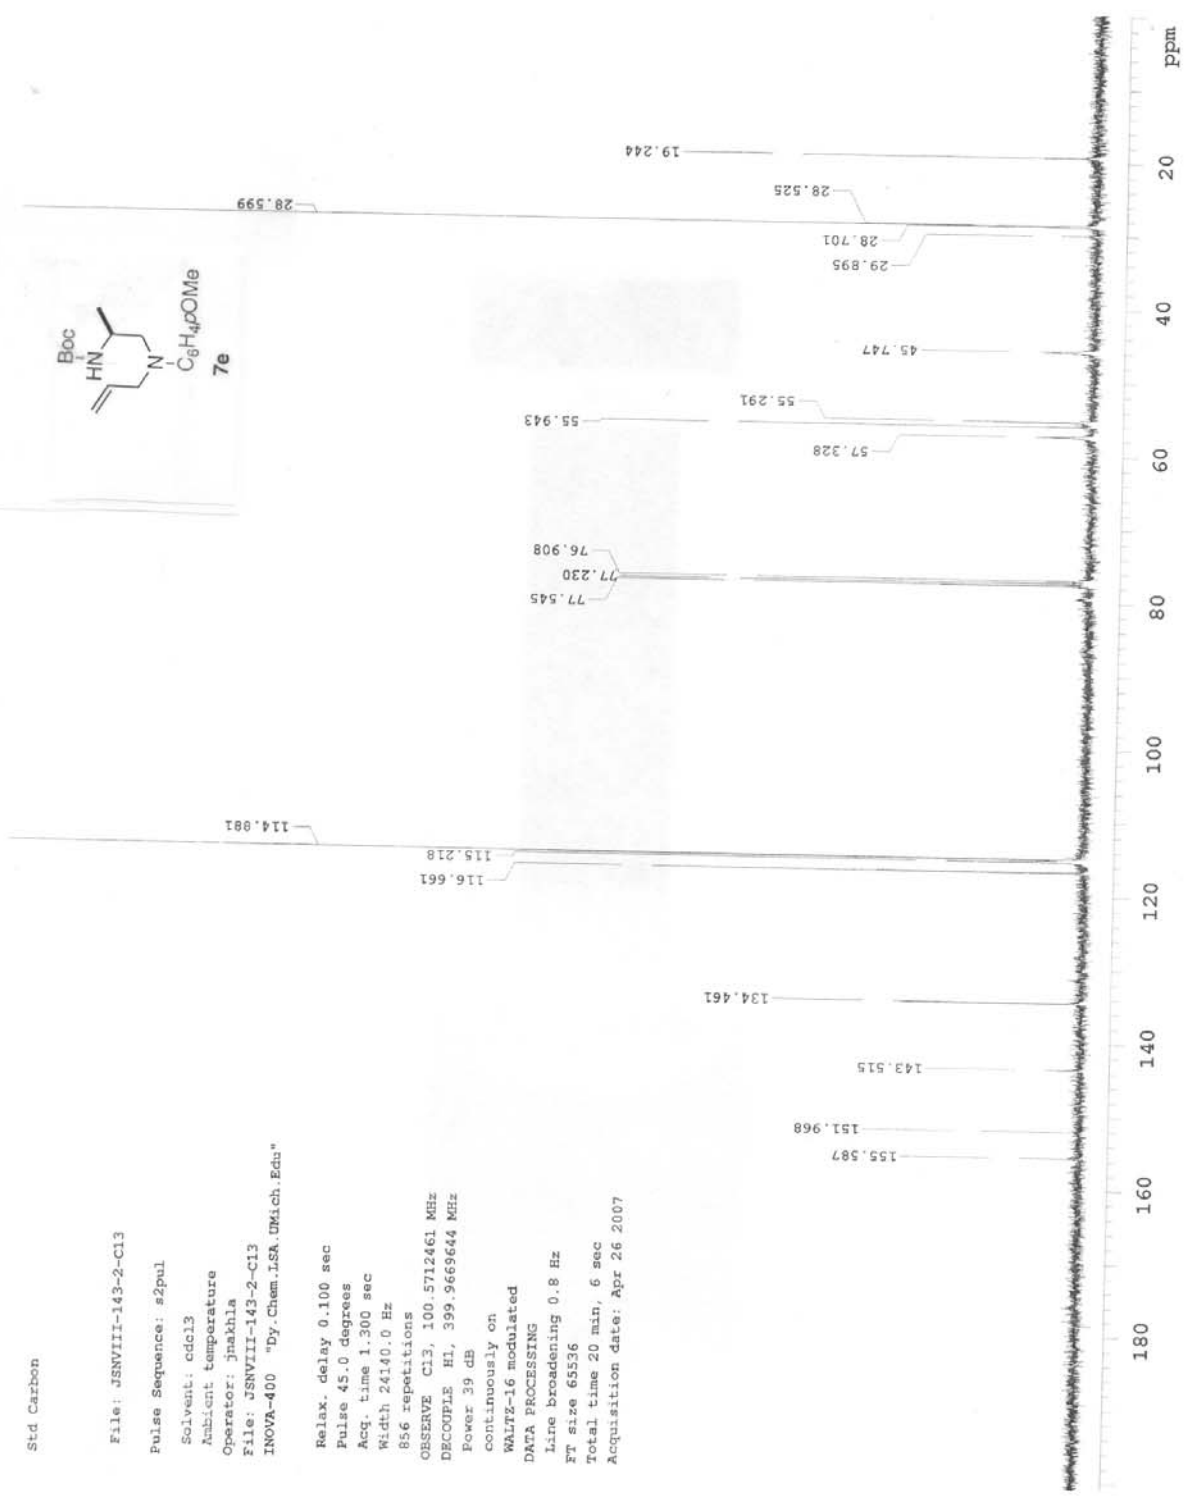

J5NVIII-98-2-2-H1

File: Proton

Pulse Sequence: s2pul

Solvent: cdcl3

Ambient temperature

Operator: jnakhla

INOVA-500 "Sn.Chem.LSA,UMich.Edu"

Relax. delay 0.100 sec

Pulse 45.0 degrees

Acq. Time 3.000 sec

Width 7998.4 Hz

8 repetitions

OBSERVE H1, 499.9042581 MHz

DATA PROCESSING

Line broadening 0.2 Hz

FT size 65536

Total Time 0 min, 31 sec

Acquisition date: Mar 15 2007

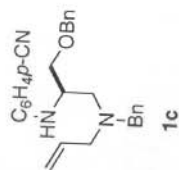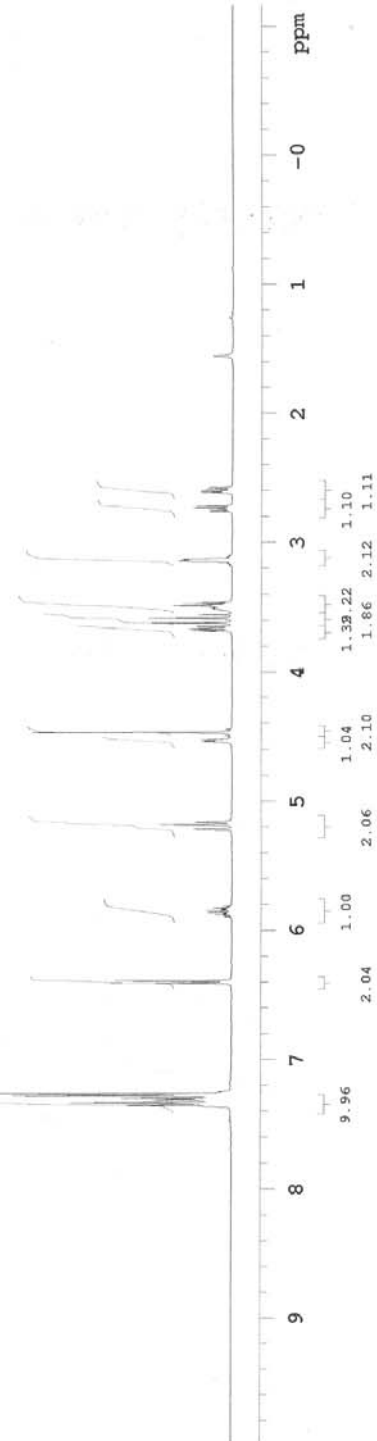

JSNVIII-98-2-2-C13

File: Carbon

Pulse Sequence: s2pul

Solvent: cdcl3

Ambient temperature

Operator: jnakhla

INOVA-400 "Zr.Chem.USA,UMich.Edu"

Relax. delay 0.100 sec

Pulse 45.0 degrees

Acq. time 1.300 sec

Width 24140.0 Hz

1232 repetitions

OBSERVE C13, 100.5712520 MHz

DECOUPLE H1, 399.9669644 MHz

Power 39 dB

continuously on

WALTZ-16 modulated

DATA PROCESSING

Line broadening 0.8 Hz

FT size 65536

Total time 28 min, 56 sec

Acquisition date: Mar 15 2007

| INDEX | FREQUENCY PPM | HEIGHT  |
|-------|---------------|---------|
| 1     | 15185.633     | 9.9     |
| 2     | 14026.076     | 4.5     |
| 3     | 13880.947     | 8.3     |
| 4     | 13641.521     | 135.640 |
| 5     | 13456.611     | 133.802 |
| 6     | 12989.547     | 129.158 |
| 7     | 12933.558     | 128.601 |
| 8     | 12927.664     | 128.542 |
| 9     | 12872.412     | 127.993 |
| 10    | 12863.572     | 127.905 |
| 11    | 12810.530     | 127.378 |
| 12    | 12138.664     | 120.697 |
| 13    | 11877.874     | 118.104 |
| 14    | 11331.247     | 112.669 |
| 15    | 9912.373      | 98.561  |
| 16    | 7798.796      | 77.545  |
| 17    | 7767.118      | 77.230  |
| 18    | 7734.703      | 76.908  |
| 19    | 7394.350      | 73.523  |
| 20    | 7035.580      | 69.956  |
| 21    | 5967.373      | 59.335  |
| 22    | 5866.445      | 58.331  |
| 23    | 5464.210      | 54.332  |
| 24    | 5169.532      | 51.402  |

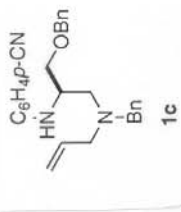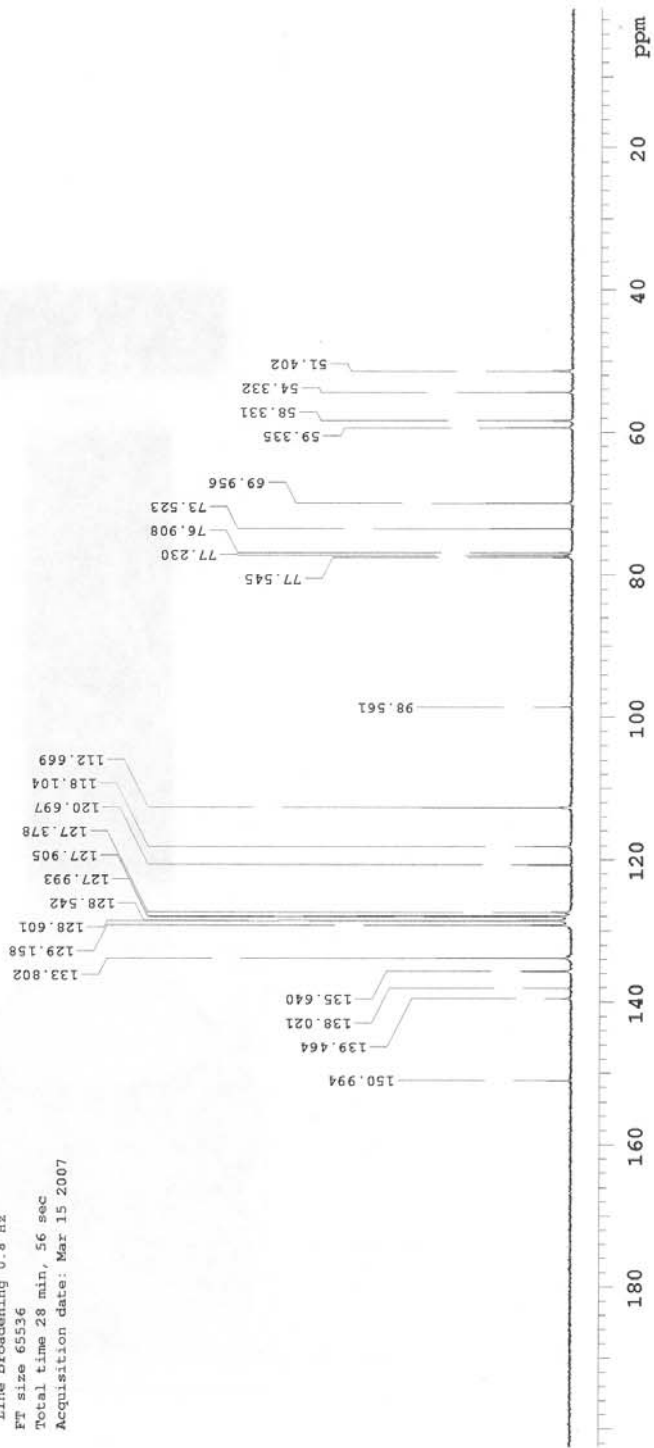

Data: C:\CLASS-VP\Enterprise\Projects\Default\Data\Nakhla Data\New Folder\JSNVIII-99-2-racAD0.7mLperpen-2.dat

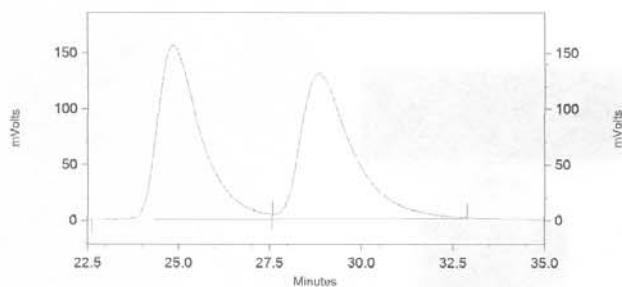

AD  
0.7% IPA/Hex  
1 mL/min

Detector 1 Ch2-254nm  
Results

| Retention Time | Area     | Area Percent |
|----------------|----------|--------------|
| 24.842         | 12928286 | 50.095       |
| 28.825         | 12879138 | 49.905       |
| Totals         | 25807424 | 100.000      |

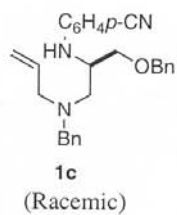

AD  
0.7% IPA/Hex  
1 mL/min

Data: C:\CLASS-VP\Enterprise\Projects\Default\Data\Nakhla Data\New  
Folder\JSNVIII-98-2-2-racAD0.7pelmlpermin2.dat

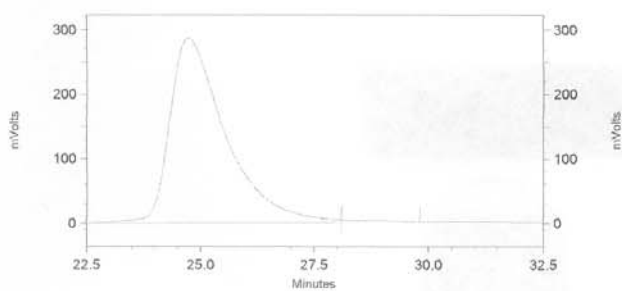

AD  
0.7% IPA/Hex  
1 mL/min

Detector 1 Ch2-254nm  
Results

| Retention Time | Area            | Area Percent   |
|----------------|-----------------|----------------|
| 24.750         | 24428409        | 99.251         |
| 28.100         | 184284          | 0.749          |
| <b>Totals</b>  | <b>24612693</b> | <b>100.000</b> |

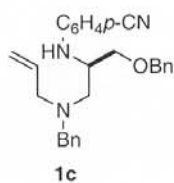

AD  
0.7% IPA/Hex  
1 mL/min

J5NVIII-150-2

File: Proton

Pulse Sequence: s2pul

Solvent: cdc13

Ambient temperature

Operator: jmakhsa

INOVA-500 "Sn. Chem. USA. UMich. Edu"

Relax. delay 0.100 sec

Pulse 45.0 degrees

Acq. time 3.000 sec

Width 7998.4 Hz

24 repetitions

OBSERVE H1, 499.9042614 MHz

DATA PROCESSING

Line broadening 0.2 Hz

FT size 65536

Total time 1 min, 20 sec

Acquisition date: May 1 2007

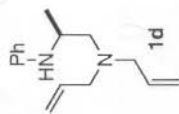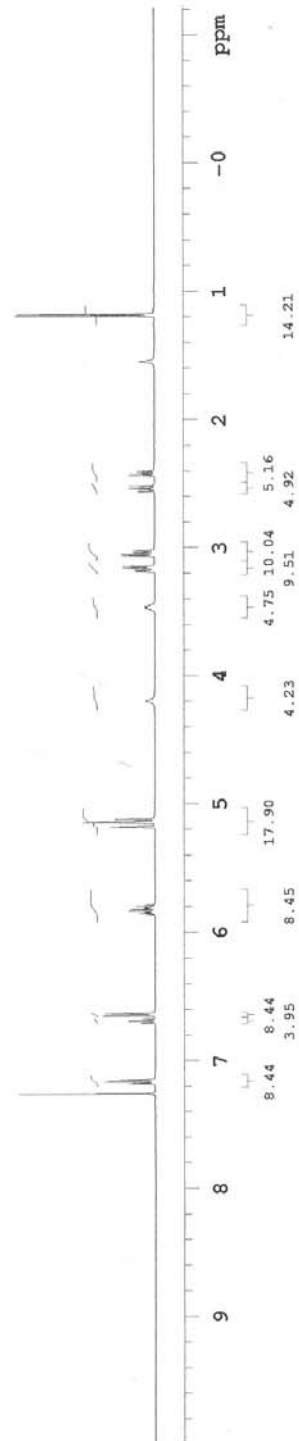



JSNVIII-150-2-C13

File: Carbon

Pulse Sequence: szpul

Solvent: cdcl3

Ambient temperature

Operator: jnakhla

INOVA-400 "Zi.Chem.I.SA.UMich.Edu"

Relax. delay 0.100 sec

Pulse 45.0 degrees

Acq. time 1.300 sec

Width 24140.0 Hz

144 repetitions

OBSERVE C13, 100.5712571 MHz

DECOUPLE H1, 399.9669644 MHz

Power 39 dB

continuously on

WALTZ-16 modulated

DATA PROCESSING

Line broadening 0.8 Hz

FT size 65536

Total time 3 min, 22 sec

Acquisition date: May 11 2007

| INDEX | FREQUENCY PPM | HEIGHT  |
|-------|---------------|---------|
| 1     | 14926.317     | 148.415 |
| 2     | 13652.572     | 135.750 |
| 3     | 13005.754     | 129.319 |
| 4     | 11833.673     | 117.665 |
| 5     | 11800.522     | 117.335 |
| 6     | 11432.174     | 113.672 |
| 7     | 5939.379      | 59.056  |
| 8     | 5756.152      | 57.254  |
| 9     | 4692.154      | 46.655  |
| 10    | 2001.009      | 19.896  |

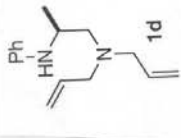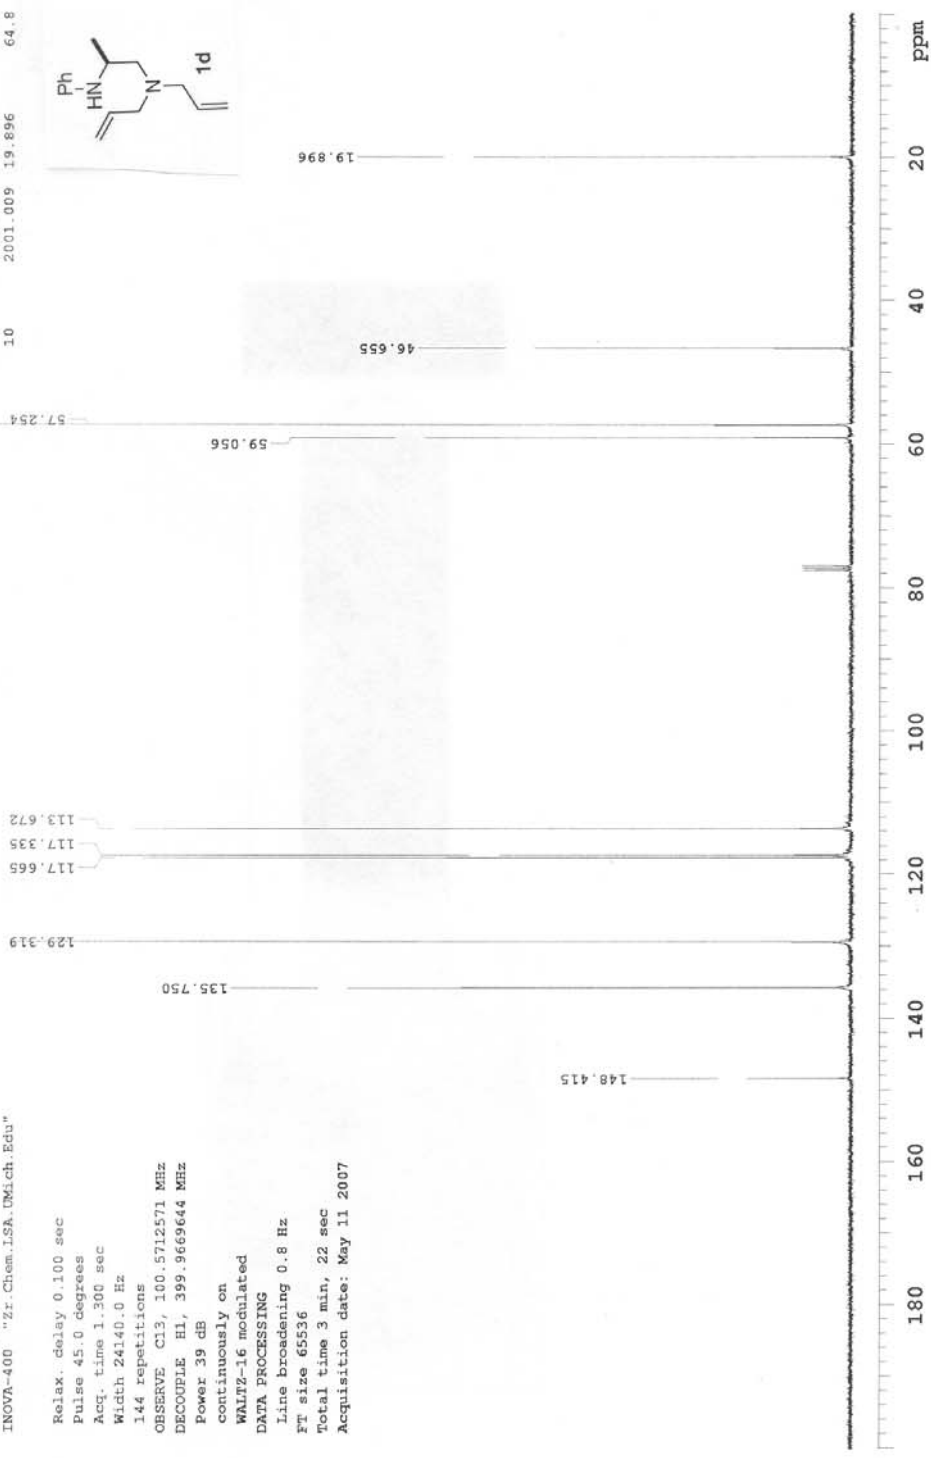

Data: C:\CLASS-VP\Enterprise\Projects\Default\Data\Nakhla Data\New Folder\JSNVIII-118-2-rac-OJH4.dat

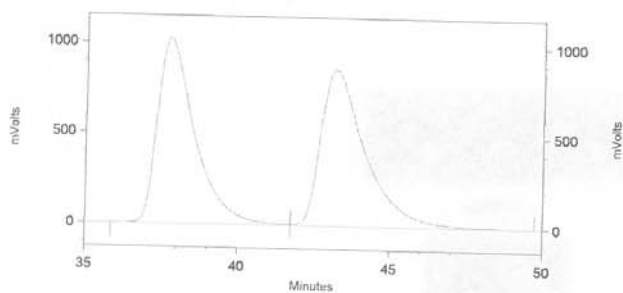

OJ-H  
1% IPA/Hex  
0.2 mL/min

Detector 1 Ch2-254nm  
Results

| Retention Time | Area      | Area Percent |
|----------------|-----------|--------------|
| 37.733         | 86677422  | 49.766       |
| 43.175         | 87493951  | 50.234       |
| Totals         | 174171373 | 100.000      |

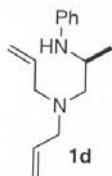

(Racemic)

OJ-H  
1% IPA/Hex  
0.2 mL/min

Data: C:\CLASS-VP\Enterprise\Projects\Default\Data\Nakhla Data\New Folder\JSNVIII-150-2-chiralc-OJH-1per.dat

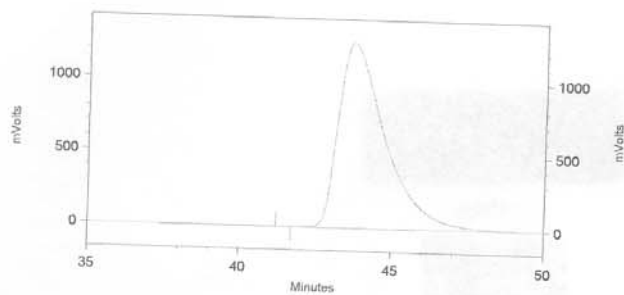

OJ-H  
1% IPA/Hex  
0.2 mL/min

Detector 1 Ch2-254nm  
Results

| Retention Time | Area      | Area Percent |
|----------------|-----------|--------------|
| 38.708         | 270174    | 0.200        |
| 43.683         | 134817201 | 99.800       |
| Totals         | 135087375 | 100.000      |

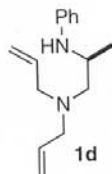

OJ-H  
1% IPA/Hex  
0.2 mL/min

JSNVII-141-2-HI400-withBINAP

File: Proton  
Pulse Sequence: s2pul  
Solvent: cdcl3  
Ambient temperature  
Operator: jnakhla  
INOVA-400 "Zr.Chem.USA,UMich.Edu"

Relax. delay 0.500 sec  
Pulse 45.0 degrees  
Acq. time 3.000 sec  
Width 6399.5 Hz  
8 repetitions  
OBSERVE HI, 399.9649486 MHz  
DATA PROCESSING  
Line broadening 0.8 Hz  
FT size 65536  
Total time 0 min, 35 sec  
Acquisition date: Apr 25 2007

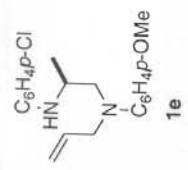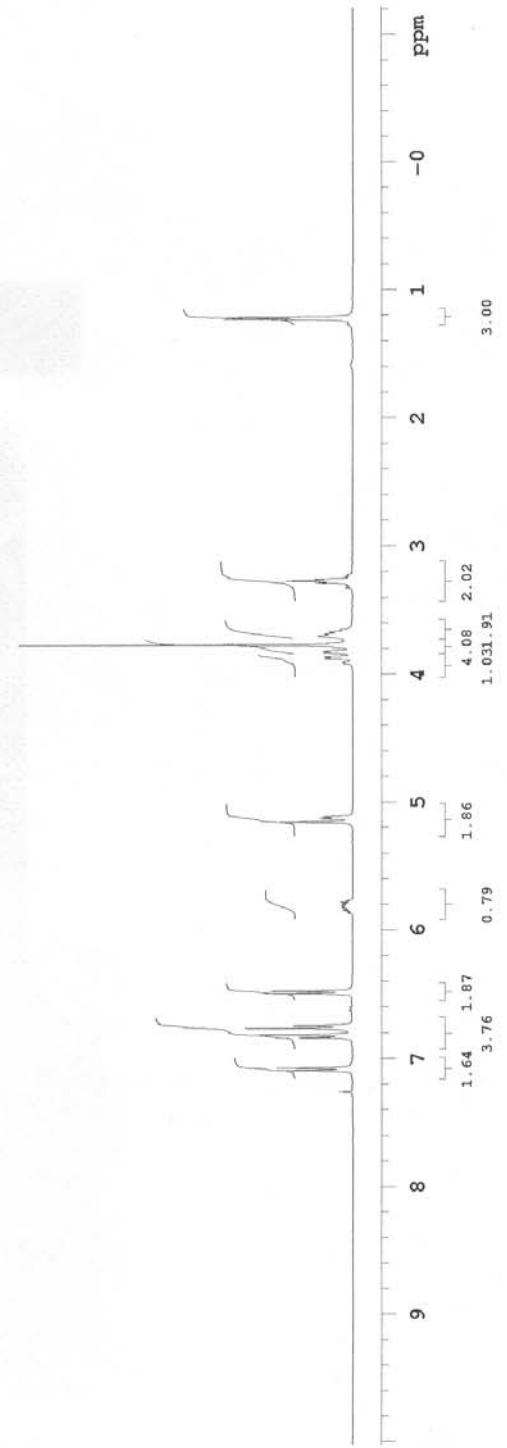

JSNVIII-141-2-withBINAP-Cl3

File: Carbon

Pulse Sequence: s2pul

Solvent: cdcl3

Ambient temperature

Operator: jnakhla

INOVA-400 "Sr.Chem.LSA,UMich,Edh"

Relax. delay 0.100 sec

Pulse 45.0 degrees

Acq. time 1.300 sec

Width 24140.0 Hz

92 repetitions

OBSERVE C13, 100.5712475 MHz

DECOUPLE H1, 399.9669644 MHz

Power 39 dB

continuously on

WALTZ-16 modulated

DATA PROCESSING

Line broadening 0.8 Hz

FT size 65536

Total time 2 min, 9 sec

Acquisition date: Apr 25 2007

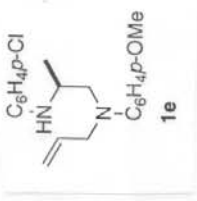

| INDEX | FREQUENCY | PPM     | HEIGHT |
|-------|-----------|---------|--------|
| 1     | 15352.972 | 152.459 | 7.6    |
| 2     | 14723.726 | 146.401 | 11.5   |
| 3     | 14442.308 | 143.603 | 8.1    |
| 4     | 13539.857 | 134.630 | 20.1   |
| 5     | 12997.650 | 129.238 | 59.4   |
| 6     | 12262.429 | 121.928 | 8.0    |
| 7     | 11754.846 | 116.881 | 28.2   |
| 8     | 11680.440 | 116.141 | 49.2   |
| 9     | 11552.255 | 114.866 | 59.5   |
| 10    | 11521.314 | 114.559 | 54.8   |
| 11    | 7798.795  | 77.545  | 27.3   |
| 12    | 7767.117  | 77.230  | 26.0   |
| 13    | 7734.703  | 76.908  | 28.2   |
| 14    | 5812.666  | 57.797  | 28.2   |
| 15    | 5621.126  | 55.892  | 22.9   |
| 16    | 5606.392  | 55.745  | 28.2   |
| 17    | 4825.495  | 47.981  | 23.8   |
| 18    | 1964.910  | 19.537  | 29.3   |

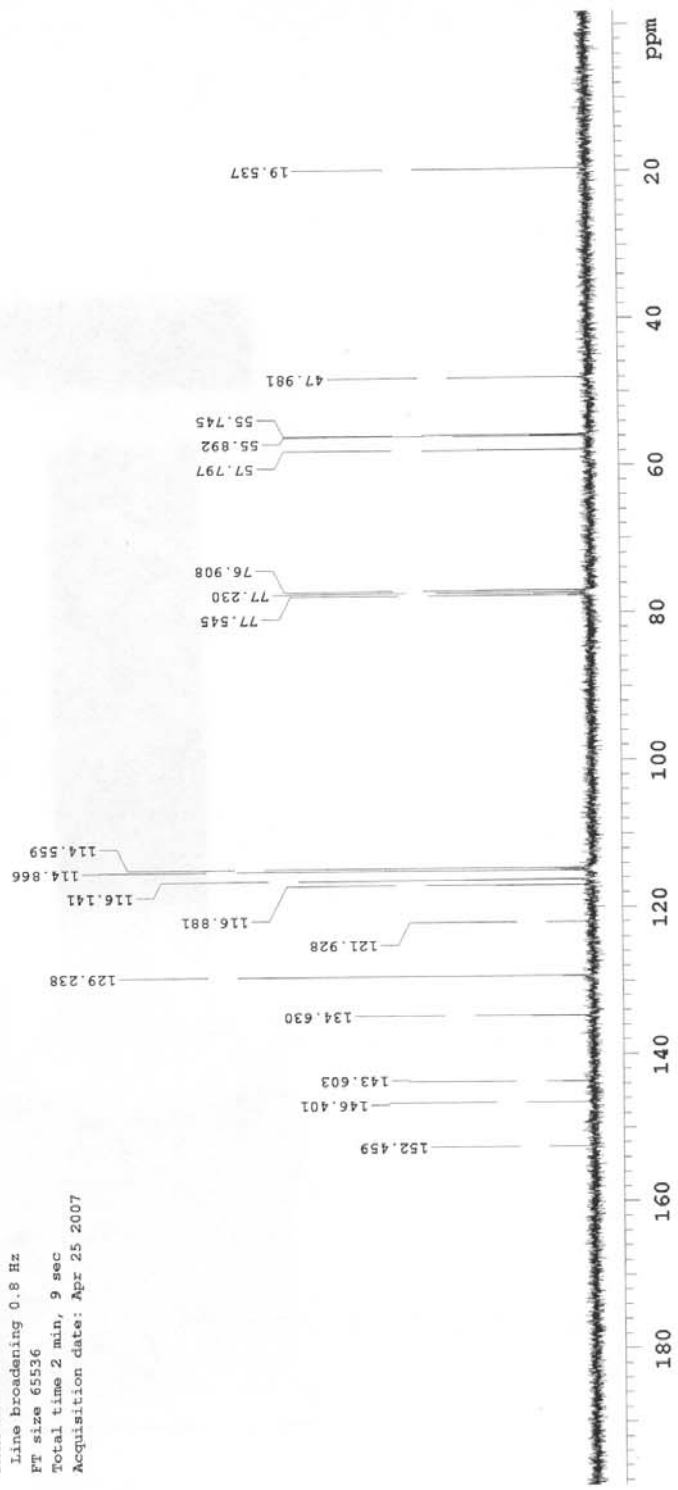

Data: C:\CLASS-VP\Enterprise\Projects\Default\Data\Nakhla Data\New Folder\JSNVIII-135-2-OD18.dat

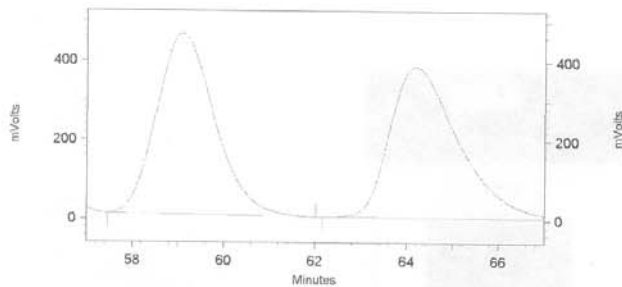

OD  
1% IPA/Hex  
0.2 mL/min

Detector 1 Ch2-254nm  
Results

| Retention Time | Area            | Area Percent   |
|----------------|-----------------|----------------|
| 59.092         | 40209739        | 50.254         |
| 64.175         | 39803931        | 49.746         |
| <b>Totals</b>  | <b>80013670</b> | <b>100.000</b> |

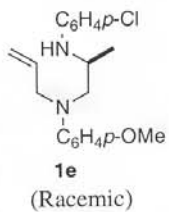

OD  
1% IPA/Hex  
0.2 mL/min

Data: C:\CLASS-VP\Enterprise\Projects\Default\Data\Nakhla Data\New Folder\JSNVIII-141-2-OD4.dat

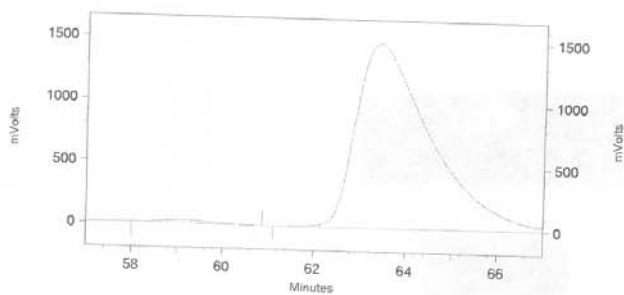

OD  
1% IPA/Hex  
0.2 mL/min

Detector 1 Ch2-254nm  
Results

| Retention Time | Area             | Area Percent   |
|----------------|------------------|----------------|
| 59.142         | 1818825          | 1.065          |
| 63.375         | 169040764        | 98.935         |
| <b>Totals</b>  | <b>170859589</b> | <b>100.000</b> |

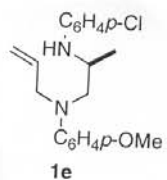

OD  
1% IPA/Hex  
0.2 mL/min

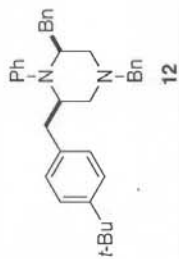

```

exp1 Proton
SAMPLE
date Dec 17 2006 temp not used
solvent cdcl3 gain not used
file /home/jnkhla- spin 20
/vmrzsys/data/Inov- hat 0.008
a.400/JSNVII-206-2~ pw90 13.800
-2.fid alfa 6.600
ACQUISITION FLAGS
SW 6399.5 il n
at 3.000 in n
np 38396 dp y
fb 4000 hs nn
bs 4 PROCESSING
ss 2 lb 0.20
dl 0.500 in not used
nt 1000 DISPLAY
ct 16 sp -463.1
TRANSMITTER
tn H1 xel 4454.5
sfrq 399.967 rfp 3670.3
tof 399.9 xp 2903.7
tpwr 59 lp -1.4
PW 6.900 MC 250
DECOUPLER
dn CL3 sc 0
dof 0 vs 26
da nnn th 13
dmm c ai cdc ph
dpwr 32
dmf 29412

```

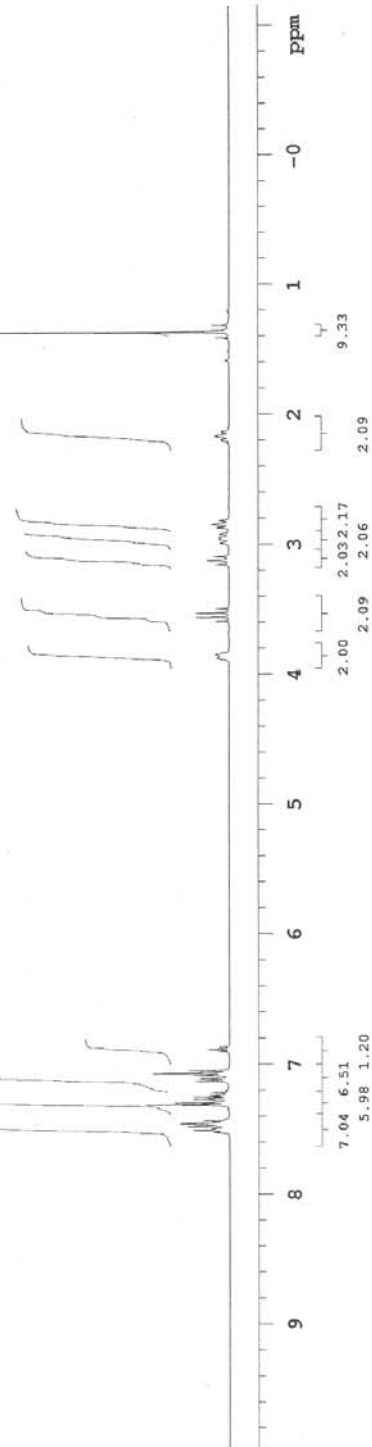



Std Carbon

File: JSNVIII-54-2-C13

Pulse Sequence: s2pul

Solvent: cdcl3

Ambient temperature

Operator: jnaakha

File: JSNVIII-54-2-C13

INOVA-400 "Dy.Chem.LSA.UMich.Edu"

Relax. delay 0.100 sec

Pulse 45.0 degrees

Acq. time 1.300 sec

Width 24140.0 Hz

4616 repetitions

OBSERVE C13, 100.5712468 MHz

DECOUPLE H1, 399.9669644 MHz

Power 39 dB

continuously on

WALTZ-16 modulated

DATA PROCESSING

Line broadening 0.8 Hz

FT size 65536

Total time 1 hr, 48 min, 25 sec

Acquisition date: May 12 2007

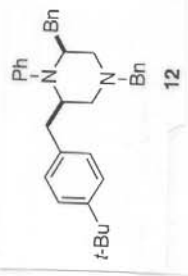

31.609  
34.576  
36.942

37.513

54.530  
55.540  
55.584  
63.232

54.119

76.915  
77.230  
77.552

113.548  
117.401

125.576  
126.220  
127.473  
128.586  
128.682  
129.143  
129.524  
129.919  
130.088

137.267  
138.966  
140.394  
147.068  
149.031

ppm  
20  
40  
60  
80  
100  
120  
140  
160  
180

Data: C:\CLASS-VP\Enterprise\Projects\Default\Data\Nakhla Data\New  
Folder\JSNVII-206-2-racFeb107.dat

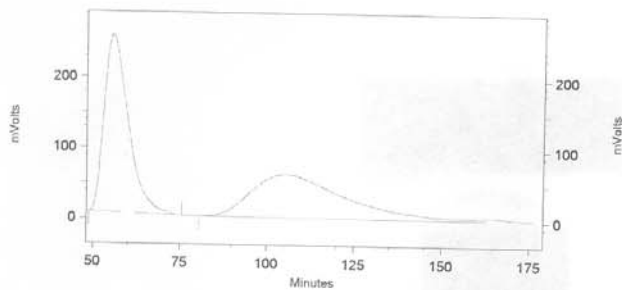

OJ-H  
2% IPA/Hex  
0.1 mL/min

Detector 1 Ch2-254nm  
Results

| Retention Time | Area      | Area Percent |
|----------------|-----------|--------------|
| 55.425         | 121188913 | 51.231       |
| 105.233        | 115365613 | 48.769       |
| Totals         | 236554526 | 100.000      |

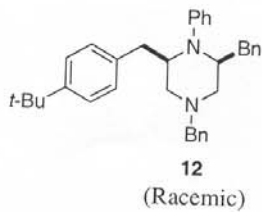

OJ-H  
2% IPA/Hex  
0.1 mL/min

Data: C:\CLASS-VP\Enterprise\Projects\Default\Data\Nakhla Data\New Folder\JSNVIII-53-2-chiral-5.dat

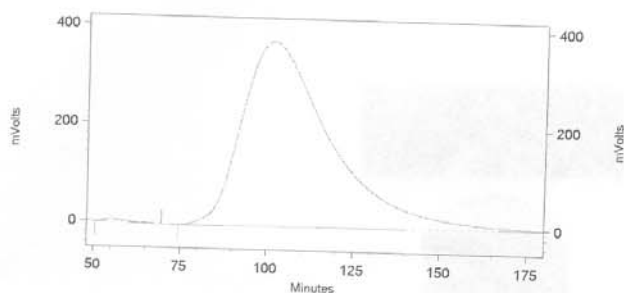

OJ-H  
2% IPA/Hex  
0.1 mL/min

Detector 1 Ch2-254nm  
Results

| Retention Time | Area             | Area Percent   |
|----------------|------------------|----------------|
| 55.133         | 2368950          | 0.355          |
| 101.142        | 664080657        | 99.645         |
| <b>Totals</b>  | <b>666449607</b> | <b>100.000</b> |

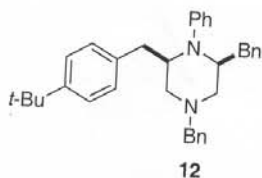

OJ-H  
2% IPA/Hex  
0.1 mL/min

J5NVIII-47-2

File: J5NVIII-47-2

Pulse Sequence: s2pul

Solvent: cdcl3

Ambient temperature

Operator: jnaakha

File: J5NVIII-47-2

INOVA-400 "2F.Chem.LSA.UMich.Edu"

Relax. delay 0.500 sec

Pulse 45.0 degrees

Acq. time 3.000 sec

Width 6399.5 Hz

28 repetitions

OBSERVE F1, 399.9649490 MHz

DATA PROCESSING

Line broadening 0.2 Hz

FT size 65836

Total time 1 min, 45 sec

Acquisition date: Feb 1 2007

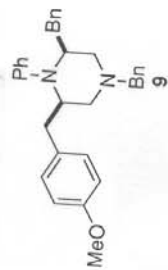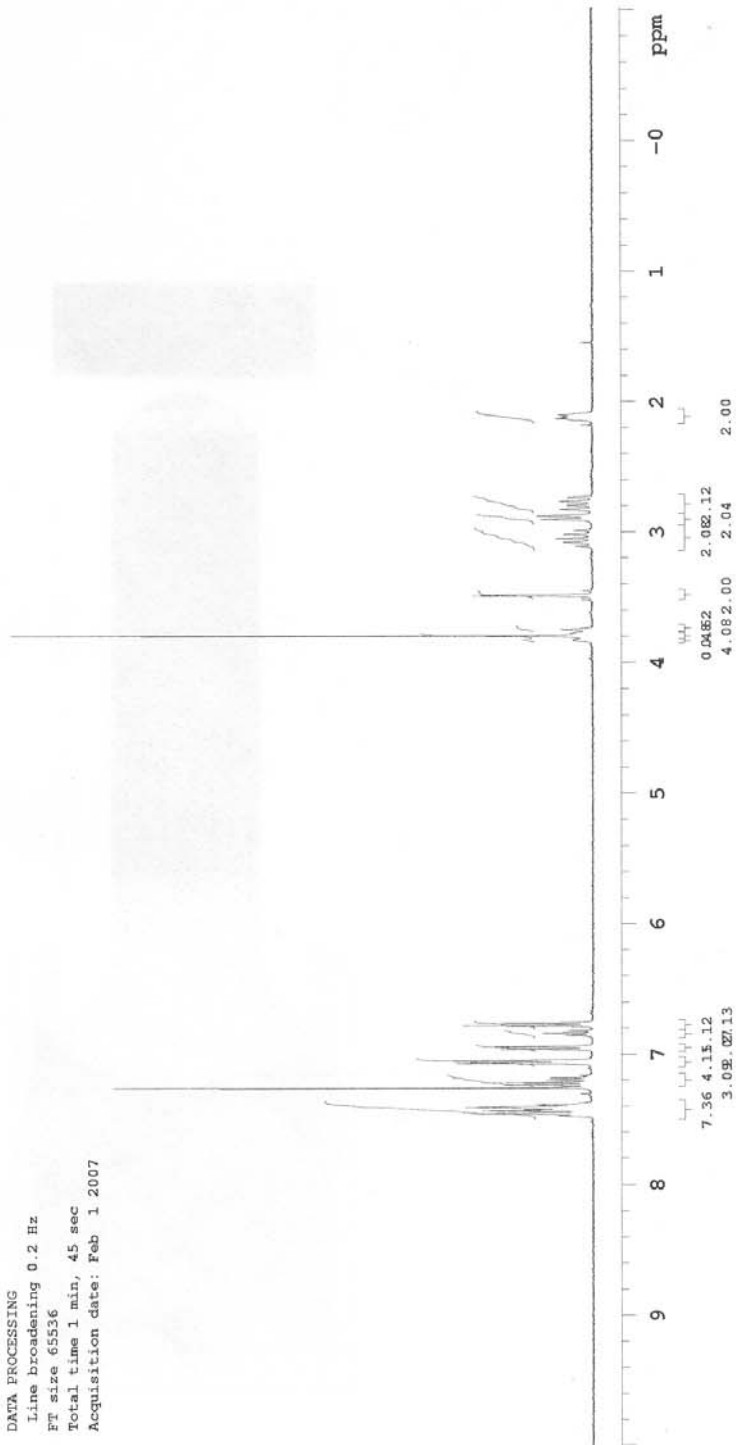

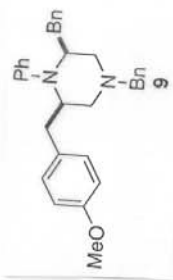

Std Carbon

File: JSNVIII-47-2-C13

Pulse Sequence: s2pdl

Solvent: cdcl3

Ambient temperature

Operator: jnakhla

File: JSNVIII-47-2-C13

INOVA-400 "Md.Chem.LSA,UMich.Edu"

Relax. delay 0.100 sec

Pulse 45.0 degrees

Acq. time 1.300 sec

Width 24140.0 Hz

836 repetitions

OBSERVE C13, 100.5712527 MHz

DECOUPLE H1, 399.9669644 MHz

Power 39 dB

continuously on

WALTZ-16 modulated

DATA PROCESSING

Line broadening 0.8 Hz

FT size 65536

Total time 19 min, 38 sec

Acquisition date: May 12 2007

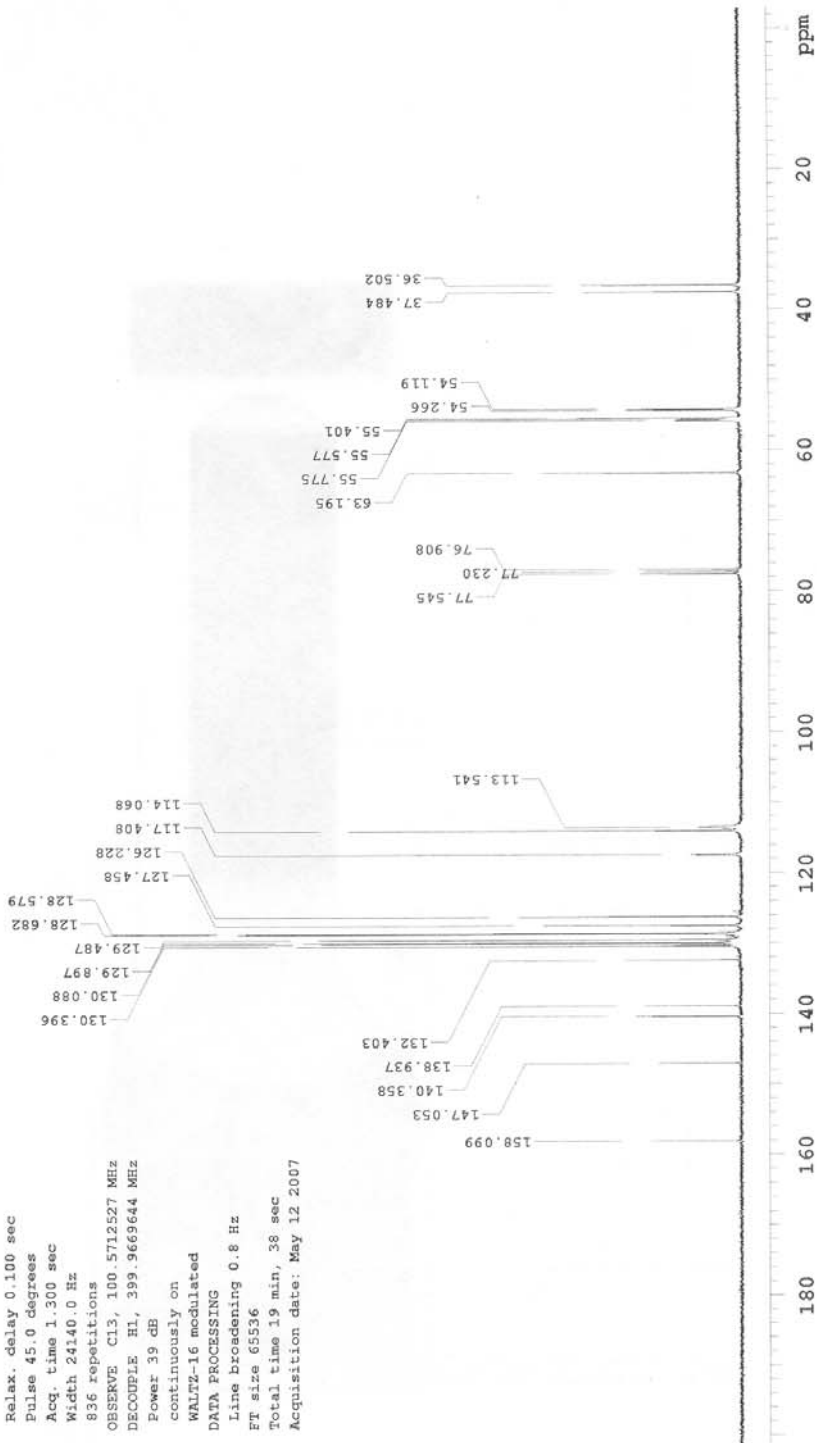

Data: C:\CLASS-VP\Enterprise\Projects\Default\Data\Nakhla Data\New Folder\JSNVIII-2-2-rac-5.dat

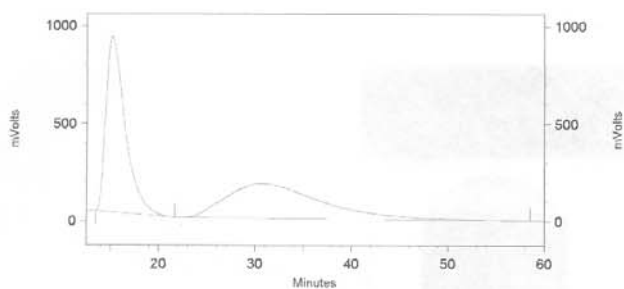

OJ-H  
10% IPA/Hex  
0.5 mL/min

Detector 1 Ch2-254nm  
Results

| Retention Time | Area      | Area Percent |
|----------------|-----------|--------------|
| 15.175         | 158185551 | 51.428       |
| 30.725         | 149403298 | 48.572       |
| Totals         | 307588849 | 100.000      |

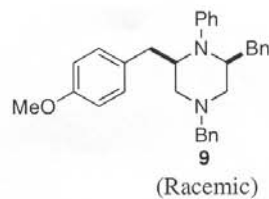

OJ-H  
10% IPA/Hex  
0.5 mL/min

Data: C:\CLASS-VP\Enterprise\Projects\Default\Data\Nakhla Data\New Folder\JSNVIII-39-2-chiral-8.dat

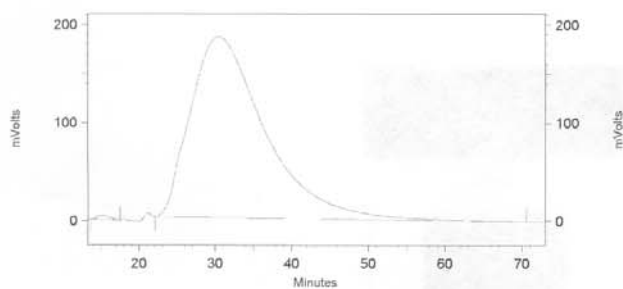

OJ-H  
10% IPA/Hex  
0.5 mL/min

Detector 1 Ch2-254nm  
Results

| Retention Time | Area      | Area Percent |
|----------------|-----------|--------------|
| 15.125         | 498271    | 0.398        |
| 30.500         | 124736349 | 99.602       |
| Totals         | 125234620 | 100.000      |

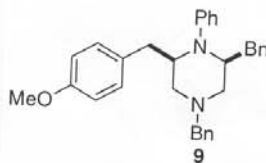

OJ-H  
10% IPA/Hex  
0.5 mL/min

## Standard Proton

File: Proton  
 Pulse Sequence: s2pul  
 Solvent: cdcl3  
 Ambient temperature  
 Operator: Jnakhia  
 INOVA-500 "En.Chem.LSA.DMich.Edu"

Relax. delay 0.100 sec  
 Pulse 45.0 degrees  
 Acq. time 3.000 sec  
 Width 8003.2 Hz  
 8 repetitions

OBSERVE H1, 499.9042612 MHz  
 DATA PROCESSING  
 Line broadening 0.2 Hz  
 FT size 65536

Total time 0 min, 31 sec  
 Acquisition date: May 12 2007

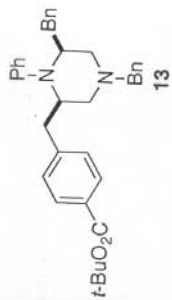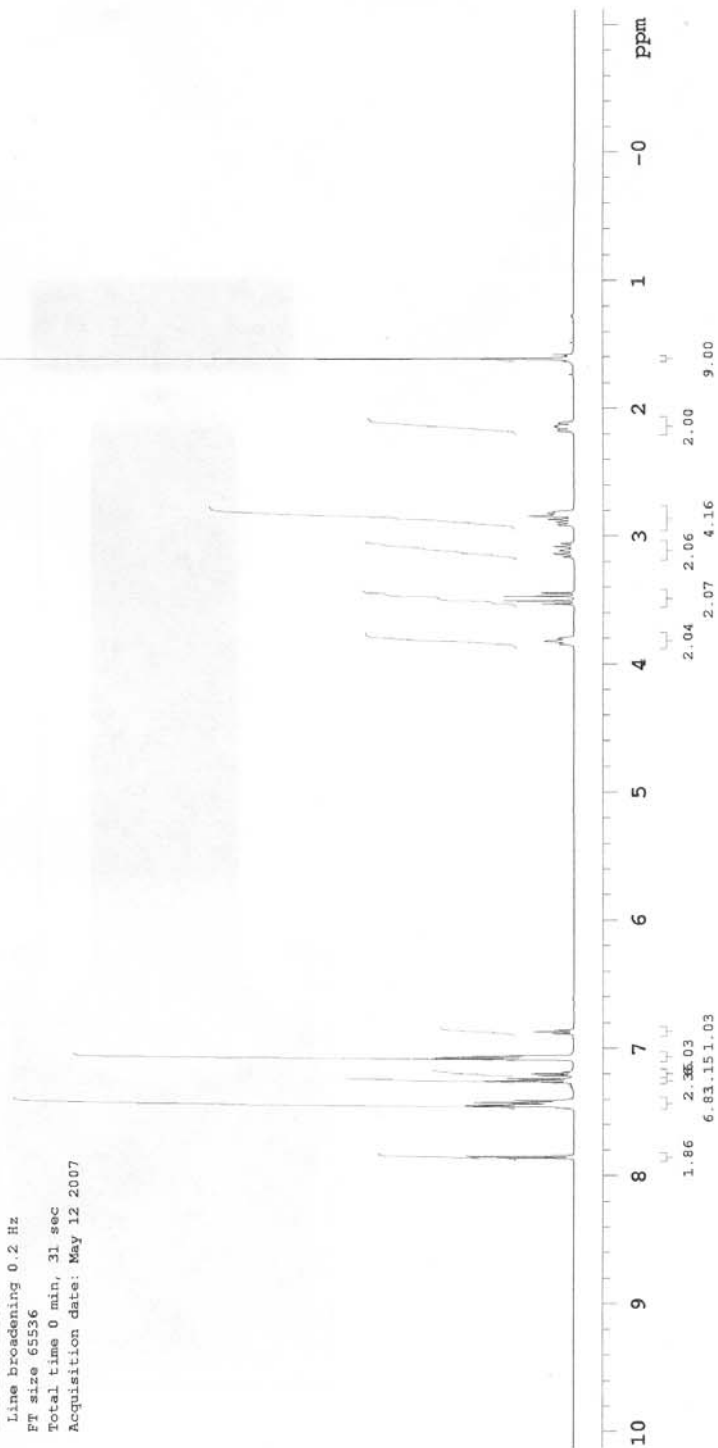



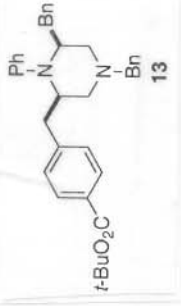

Std Carbon

File: JSNVIII-42-C13

Pulse Sequence: s2pul

Solvent: cdcl3

Ambient temperature

Operator: jnakhla

File: JSNVIII-42-C13

INOVA-400 "Dy. Chem. I.S.A. UMich. Edu"

Relax. delay 0.100 sec

Pulse 45.0 degrees

Acq. time 1.300 sec

Width 24140.0 Hz

1016 repetitions

OBSERVE C13, 100.5712527 MHz

DECOUPLE H1, 399.9669644 MHz

Power 39 dB

continuously on

WALTZ-16 modulated

DATA PROCESSING

Line broadening 0.8 Hz

FT size 65536

Total time 23 min, 51 sec

Acquisition date: May 12 2007

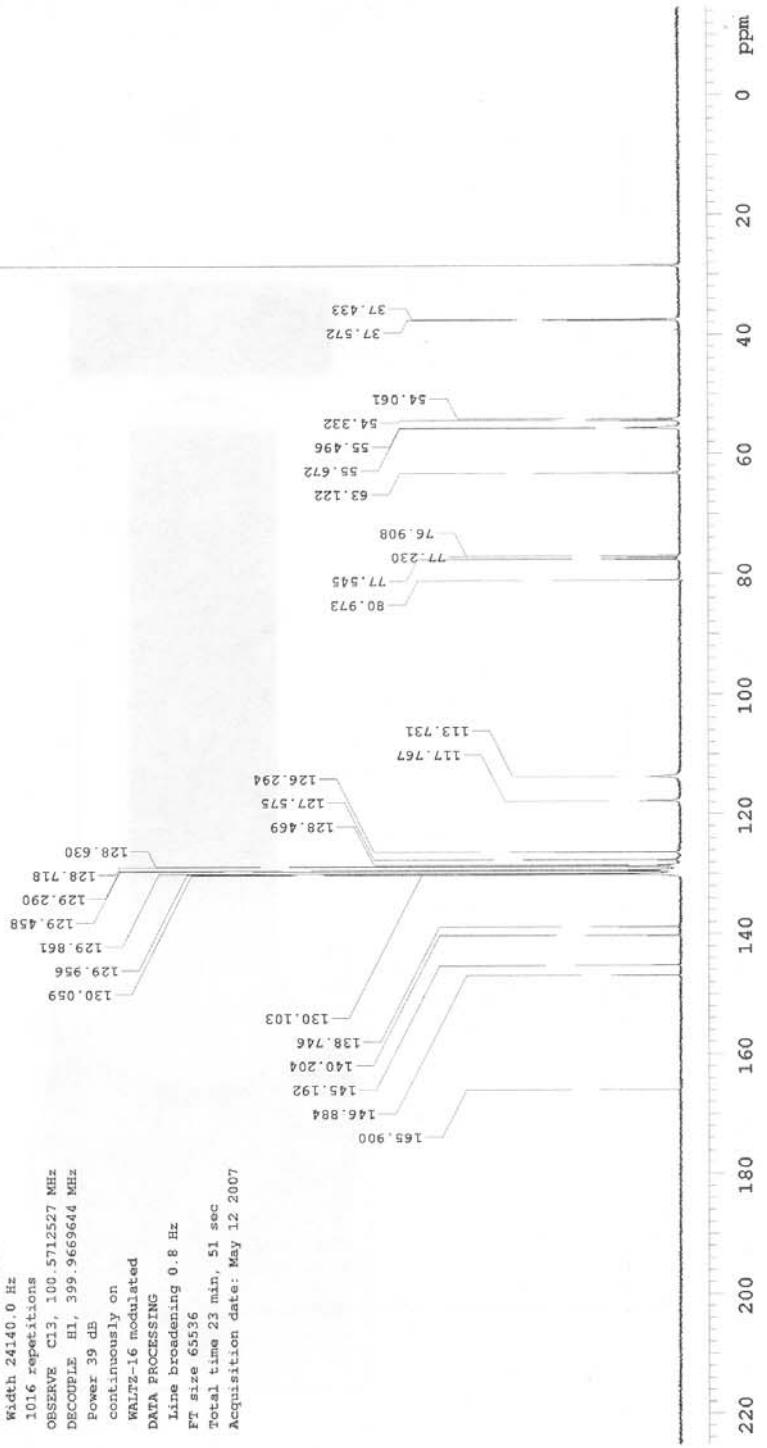

Data: C:\CLASS-VP\Enterprise\Projects\Default\Data\Nakhla Data\New Folder\JSNVII-208-2-rac-12.dat

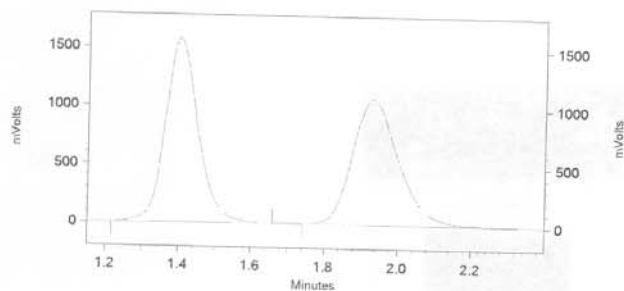

OD-H  
5% IPA/Hex  
2 mL/min

Detector 1 Ch2-254nm  
Results

| Retention Time | Area     | Area Percent |
|----------------|----------|--------------|
| 1.400          | 9803626  | 51.113       |
| 1.925          | 9376659  | 48.887       |
| Totals         | 19180285 | 100.000      |

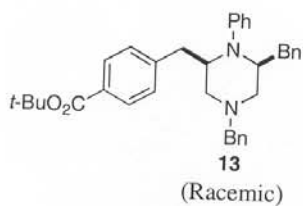

OD-H  
5% IPA/Hex  
2 mL/min

Data: C:\CLASS-VP\Enterprise\Projects\Default\Data\Nakhla Data\New Folder\JSNVIII-42-2-1chiral.dat

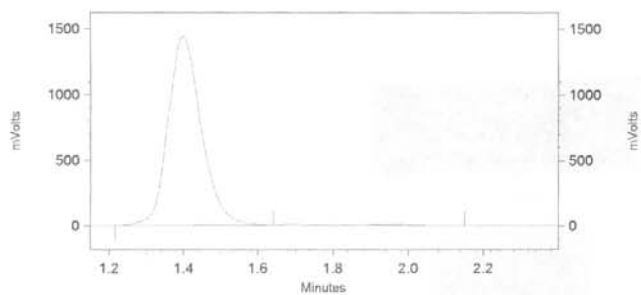

OD-H  
5% IPA/Hex  
2 mL/min

Detector 1 Ch2-254nm

Results

| Retention Time | Area           | Area Percent   |
|----------------|----------------|----------------|
| 1.400          | 8916087        | 99.285         |
| 1.942          | 64232          | 0.715          |
| <b>Totals</b>  | <b>8980319</b> | <b>100.000</b> |

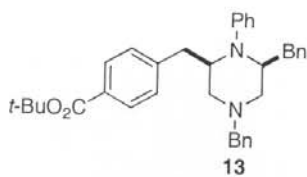

OD-H  
5% IPA/Hex  
2 mL/min

Std proton

File: JSNVIII-74-2-H1

Pulse Sequence: s2pul

Solvent: cdcl3

Ambient temperature

Operator: jna@hls

File: JSNVIII-74-2-H1

INOVA-400 "2: Chem.LSA.UWich.Edh"

Relax. delay 0.500 sec

Pulse 45.0 degrees

Acq. time 3.000 sec

Width 6399.5 Hz

4 repetitions

OBSERVE H1, 399.9649491 MHz

DATA PROCESSING

Line broadening 0.2 Hz

FT size 65536

Total time 0 min, 21 sec

Acquisition date: Mar 7 2007

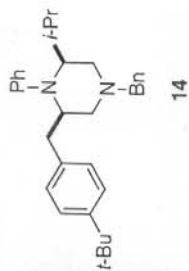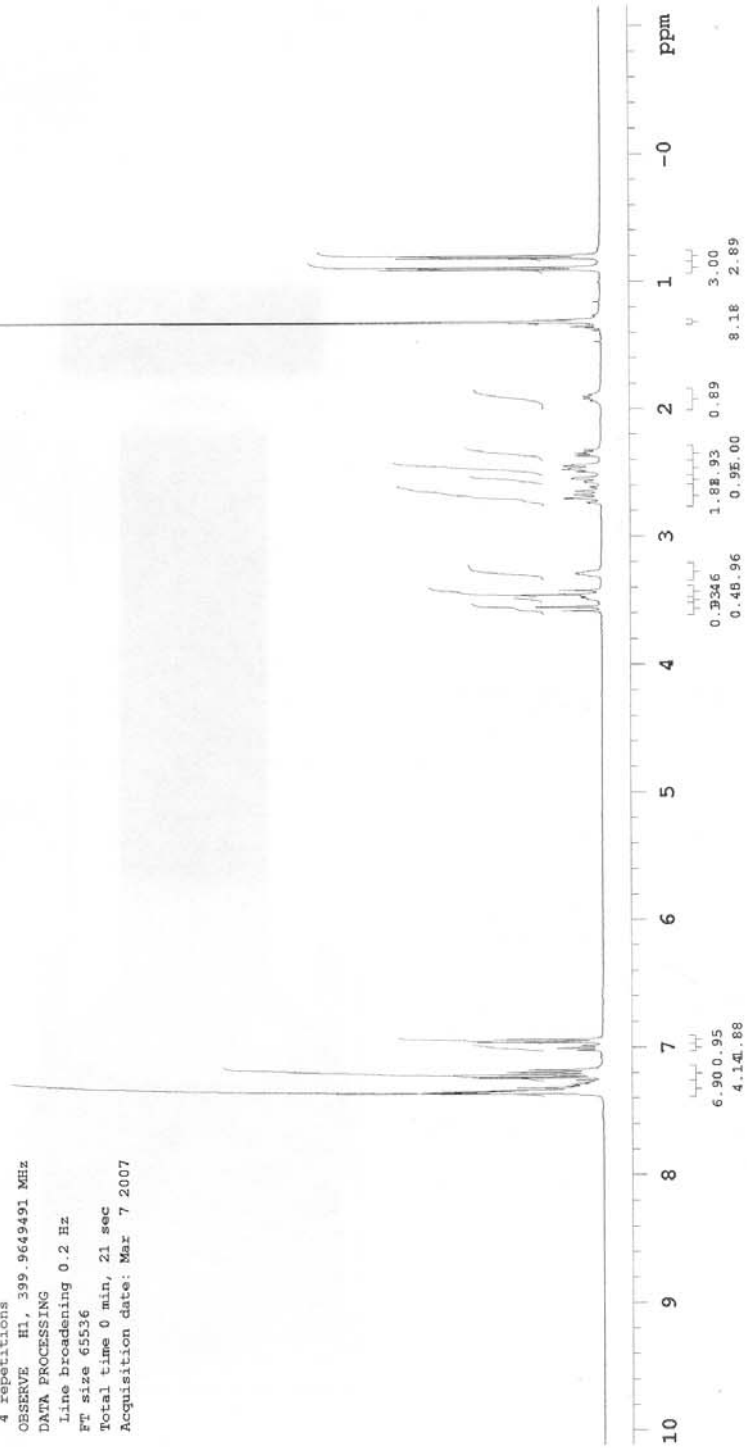

Std Carbon

File: JSNVII-197-2-Cl3-chiral

Pulse Sequence: s2pul

Solvent: cdcl3

Ambient temperature

Operator: jnakhia

File: JSNVII-197-2-Cl3-chiral

INOVA-400 "Ma.Chem.LSA.UMich.Edu"

Relax. delay 0.100 sec

Pulse 45.0 degrees

Acq. time 1.300 sec

Width 24140.0 Hz

316 repetitions

OBSERVE C13, 100.5712542 MHz

DECOUPLE H1, 399.9669644 MHz

Power 39 dB

continuously on

WALTZ-16 modulated

DATA PROCESSING

Line broadening 0.8 Hz

FT size 65536

Total time 7 min, 25 sec

Acquisition date: Dec 8 2006

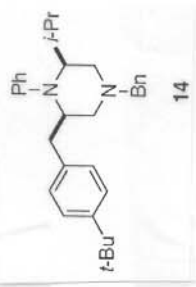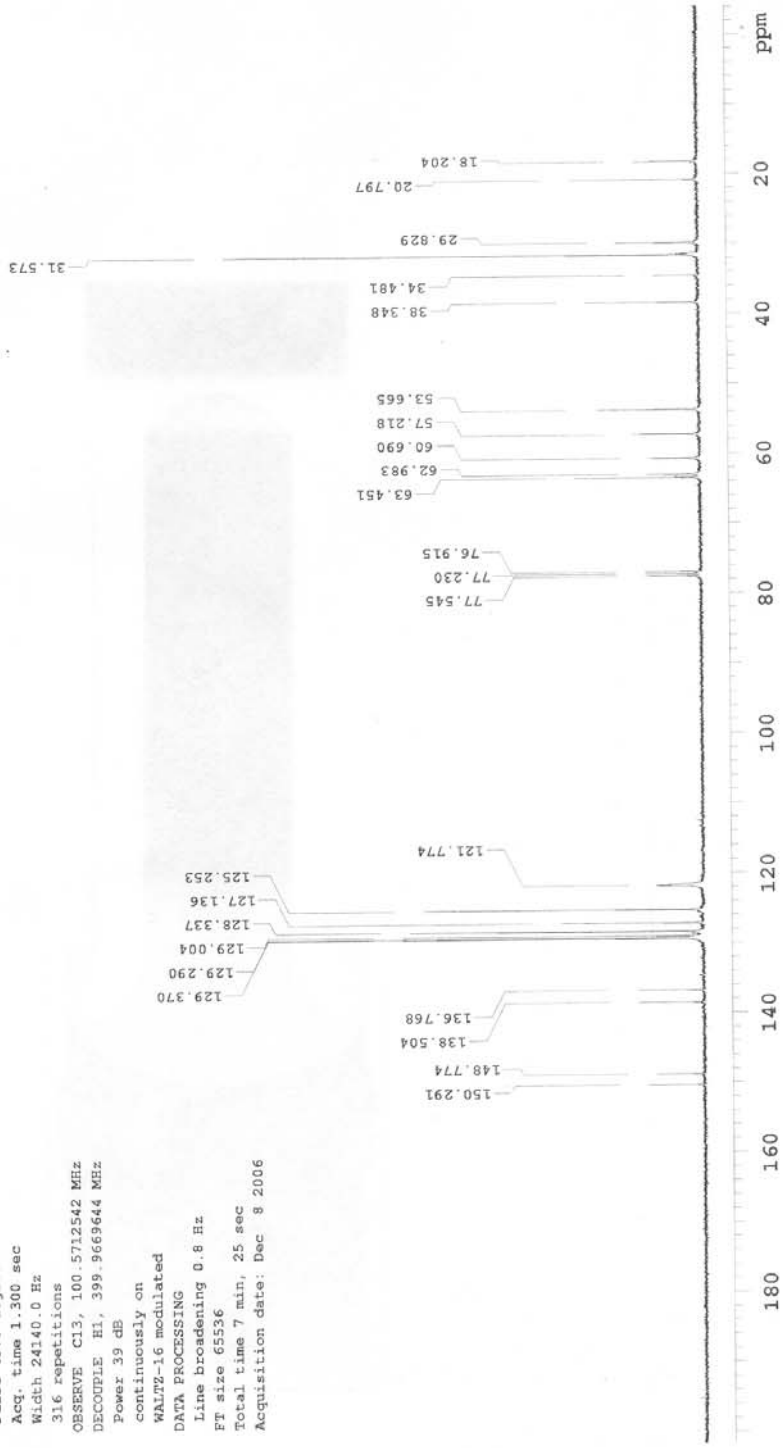

Data: C:\CLASS-VP\Enterprise\Projects\Default\Data\Nakhla Data\New Folder\JSNVIII-66-2-may16071mLpermindillhex.dat

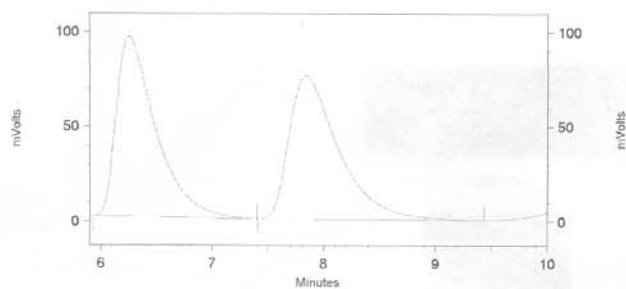

OD-H  
100% Hex  
1 mL/min

Detector 1 Ch2-254nm  
Results

| Retention Time | Area    | Area Percent |
|----------------|---------|--------------|
| 6.250          | 2334202 | 50.007       |
| 7.842          | 2333531 | 49.993       |
| Totals         | 4667733 | 100.000      |

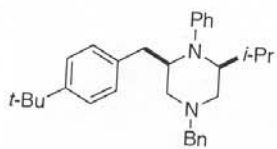

14  
(Racemic)

OD-H  
100% Hex  
1 mL/min

Data: C:\CLASS-VP\Enterprise\Projects\Default\Data\Nakhla Data\New Folder\JSNVIII-59-2-chiralhexanes.dat

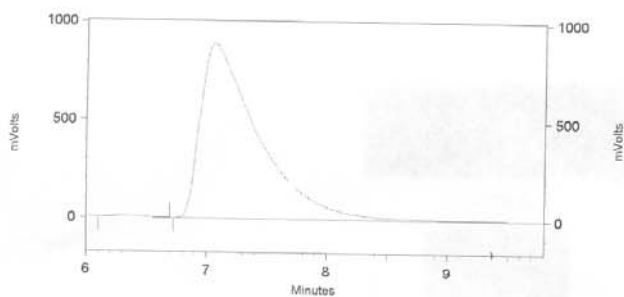

OD-H  
100% Hex  
1 mL/min

Detector 1 Ch2-254nm  
Results

| Retention Time | Area     | Area Percent |
|----------------|----------|--------------|
| 6.292          | 92296    | 0.312        |
| 7.058          | 29526566 | 99.688       |
| Totals         | 29618862 | 100.000      |

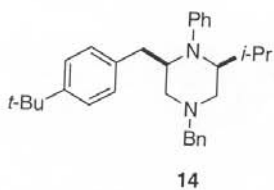

OD-H  
100% Hex  
1 mL/min

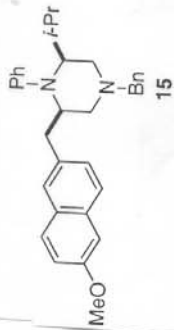

## Standard Proton

File: J5NVIII-61-2H1

Pulse Sequence: s2pul

Solvent: cdcl3

Ambient temperature

Operator: jnakhla

File: J5NVIII-61-2H1

INVA-500 "Py, Chem. Lab, UGA, ch., Edu"

Pulsx, delay 0.100 sec

Pulse 45.0 degrees

Acq. time 3.000 sec

Width 7998.4 Hz

8 repetitions

OBSERVE H1, 499.9042611 MHz

DATA PROCESSING

Line broadening 0.2 Hz

FT size 65536

Total time 0 min, 31 sec

Acquisition date: Mar 9 2007

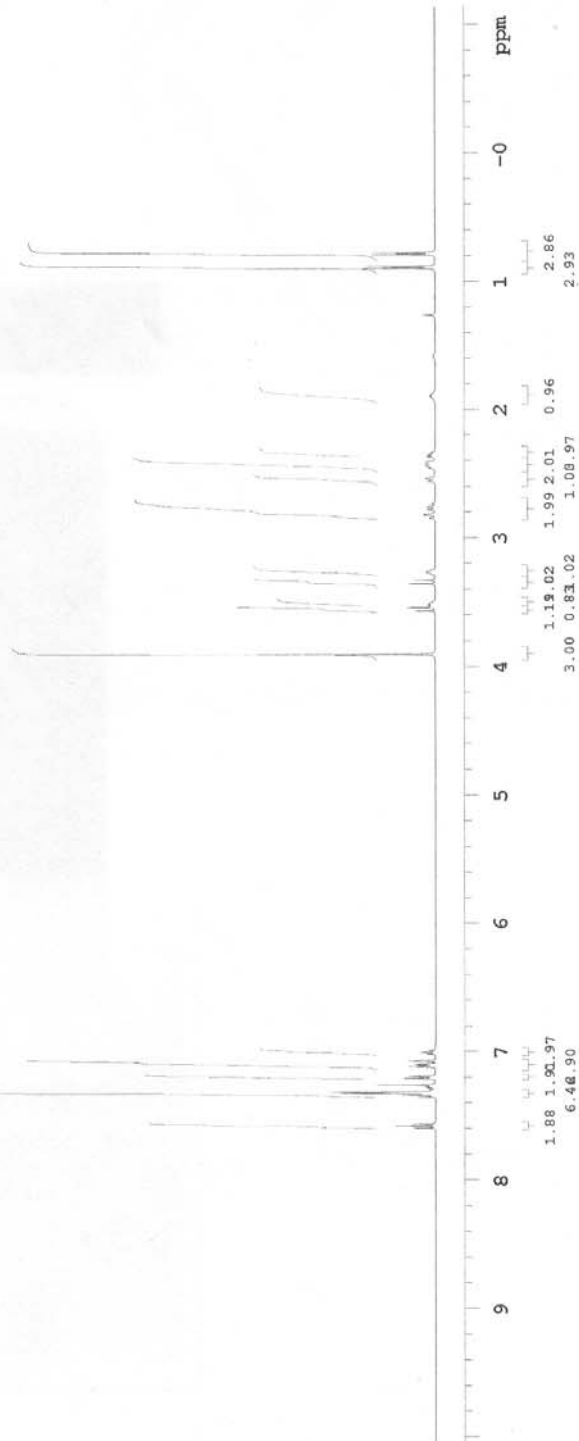



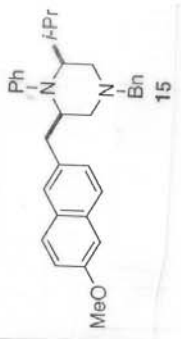

Std Carbon

File: JSNVIII-61-2-C13

Pulse Sequence: #2pul

Solvent: cdcl3

Ambient temperature

Operator: jnakhla

File: JSNVIII-61-2-C13

INOVA-400 "Md.Chem.LSA.DMich.Edu"

Relax. delay 0.100 sec

Pulse 45.0 degrees

Acq. time 1.300 sec

Width 24140.0 Hz

1208 repetitions

OBSERVE C13, 100.5712425 MHz

DECOUPLE H1, 399.9669644 MHz

Power 39 dB

continuously on

WALTZ-16 modulated

DATA PROCESSING

Line broadening 0.8 Hz

FT size 65536

Total time 28 min, 22 sec

Acquisition date: Mar 9 2007

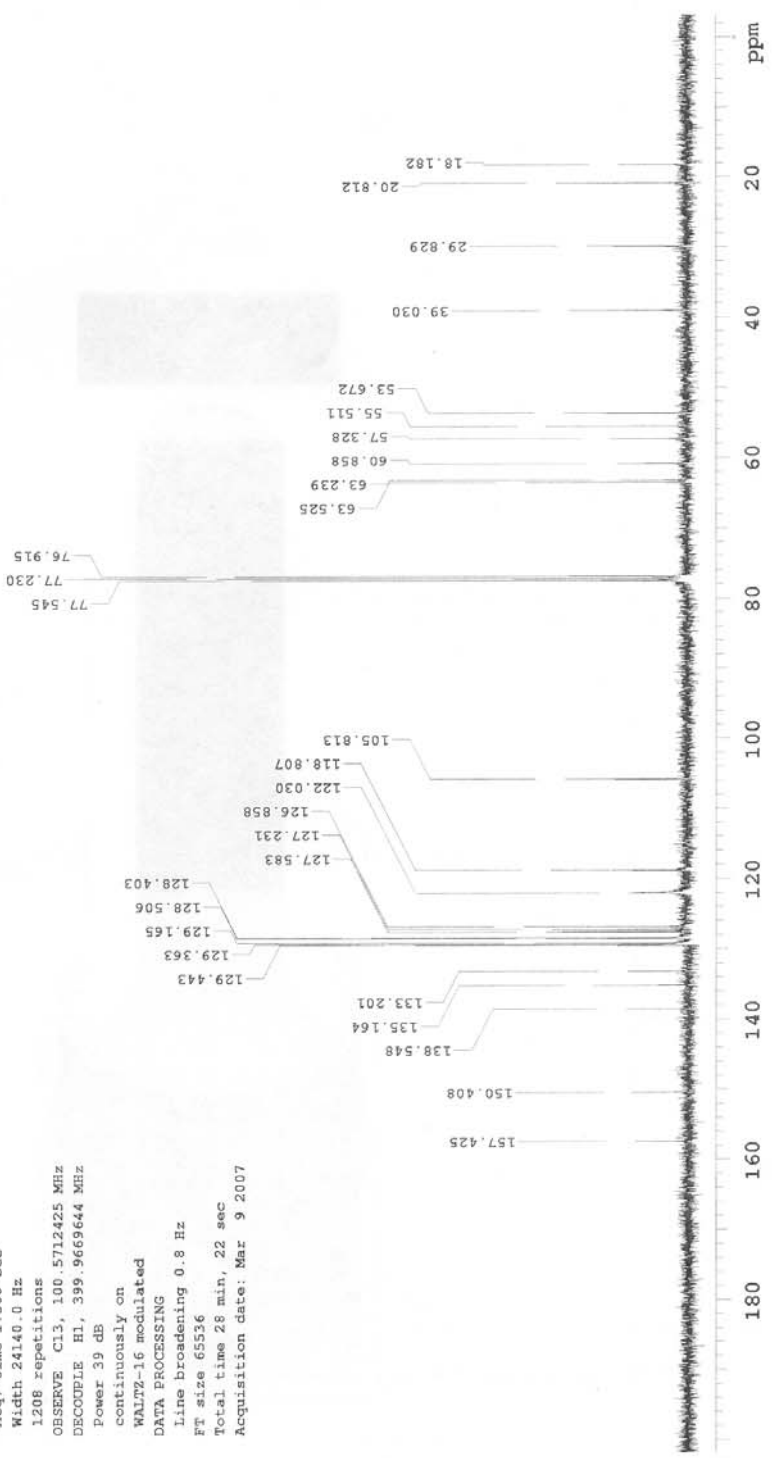

Standard Proton

File: JSNVIII-61-2-cosy

Pulse Sequence: gCOSY

Solvent: cd3od

Ambient temperature

Operator: jmkhla

File: JSNVIII-61-2-cosy

INOVA-500 "Md.Chem.USA,UMich.Edu"

Relax. delay 1.301 sec

Acq. time 0.206 sec

Width 4970.2 Hz

2D Width 4970.2 Hz

2 repetitions

200 increments

OBSERVE H1, 499.9062312 MHz

DATA PROCESSING

Sine bell 0.103 sec

F1 DATA PROCESSING

Sine bell 0.080 sec

FT size 4096 x 4096

Total time 10 min, 40 sec

Acquisition date: Mar 9 2007

In MeOH

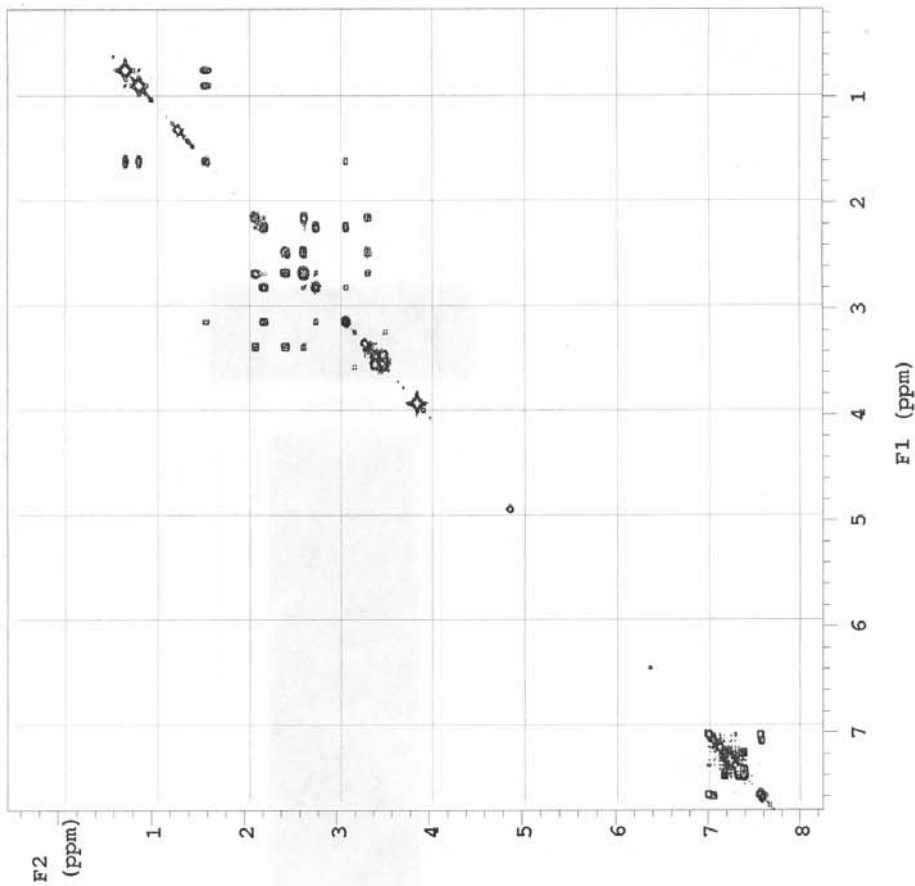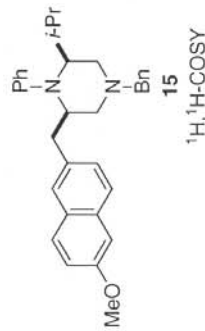

In MeOH

Std proton

File: Noesy

Pulse Sequence: NOESY

Solvent: cd3cd

Ambient temperature

Operator: jnakhla

INOVA-400 "Zr.Chem.LSA.UMich.Edu"

Relax. delay 1.000 sec

Mixing 0.500 sec

Acq. time 0.229 sec

Width 4474.8 Hz

2D Width 4474.8 Hz

8 repetitions

2 x 200 increments

OBSERVE H1, 399.9665404 MHz

DATA PROCESSING

Gauss apodization 0.106 sec

F1 DATA PROCESSING

Gauss apodization 0.082 sec

FT size 4096 x 4096

Total time 1 hr, 35 min, 15 sec

Acquisition date: Mar 10 2007

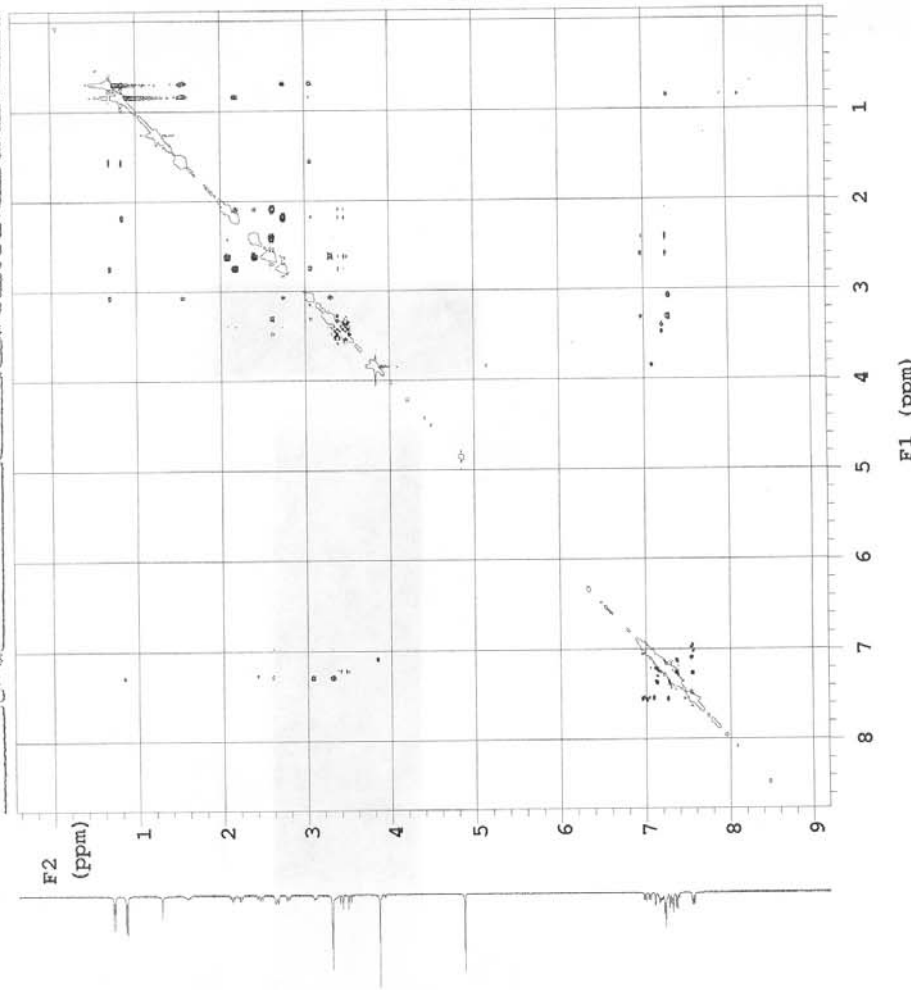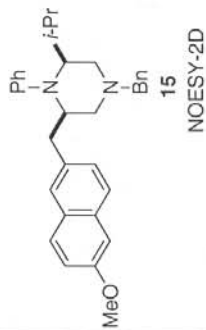

Data: C:\CLASS-VP\Enterprise\Projects\Default\Data\Nakhla Data\New Folder\JSNVIII-67-2-rac30AD.dat

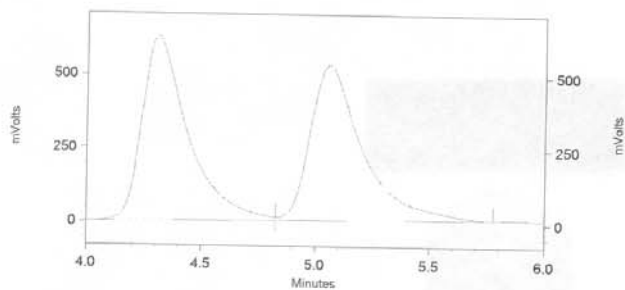

AD  
5% IPA/Hex  
0.9 mL/min

Detector 1 Ch2-254nm  
Results

| Retention Time | Area            | Area Percent   |
|----------------|-----------------|----------------|
| 4.308          | 8690072         | 50.871         |
| 5.058          | 8392403         | 49.129         |
| <b>Totals</b>  | <b>17082475</b> | <b>100.000</b> |

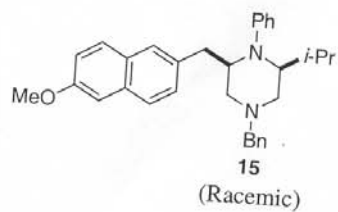

AD  
5% IPA/Hex  
0.9 mL/min

Data: C:\CLASS-VP\Enterprise\Projects\Default\Data\Nakhla Data\New Folder\JSNVIII-61-2-chiral-feb1307dii2.dat

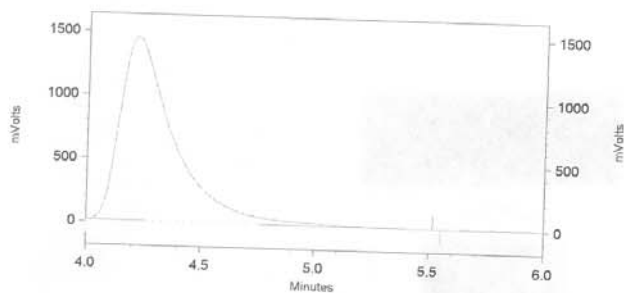

AD  
5% IPA/Hex  
0.9 mL/min

Detector 1 Ch2-254nm  
Results

| Retention Time | Area            | Area Percent   |
|----------------|-----------------|----------------|
| 4.217          | 23659024        | 99.580         |
| 5.775          | 99800           | 0.420          |
| <b>Totals</b>  | <b>23758824</b> | <b>100.000</b> |

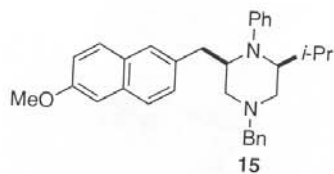

AD  
5% IPA/Hex  
0.9 mL/min

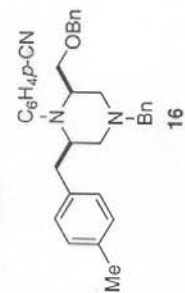

Standard Proton

File: JSNVIII-105-2

Pulse Sequence: #2pul

Solvent: cdcl3

Ambient temperature

Operator: jnakhla

File: JSNVIII-105-2

INOVA-500 "Dy.Chem.LSA,UMich.Edu"

Relax. delay 0.100 sec

Pulse 45.0 degrees

Acq. time 3.000 sec

Width 7988.4 Hz

8 repetitions

OBSERVE H1, 499.9042609 MHz

DATA PROCESSING

Line broadening 0.2 Hz

FT size 65536

Total time 0 min, 31 sec

Acquisition date: Mar 8 2007

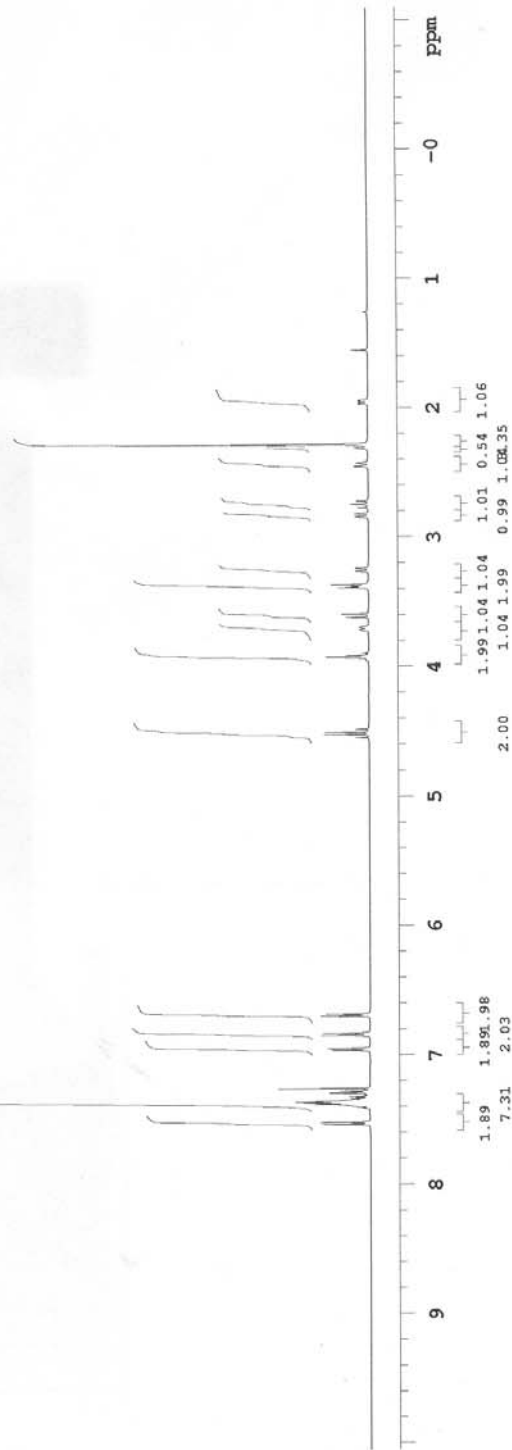

Standard Carbon

File: JSNVIII-105-2-C13

Pulse Sequence: s2pul

Solvent: cdcl3

Ambient temperature

Operator: jnakhla

File: JSNVIII-105-2-C13

INOVA-500 "Dy.Chem.LSA.UMich.Edu"

Relax. delay 0.100 sec

Pulse 45.0 degrees

Acc. time 1.300 sec

Width 30165.9 Hz

17420 repetitions

OBSERVE C13, 125.7010001 MHz

DECOUPLE H1, 499.9067532 MHz

Power 31 dB

continuously on

WALTZ-16 modulated

DATA PROCESSING

Line broadening 1.0 Hz

FT size 131072

Total time 6 hr, 49 min, 14 sec

Acquisition date: Mar 8 2007

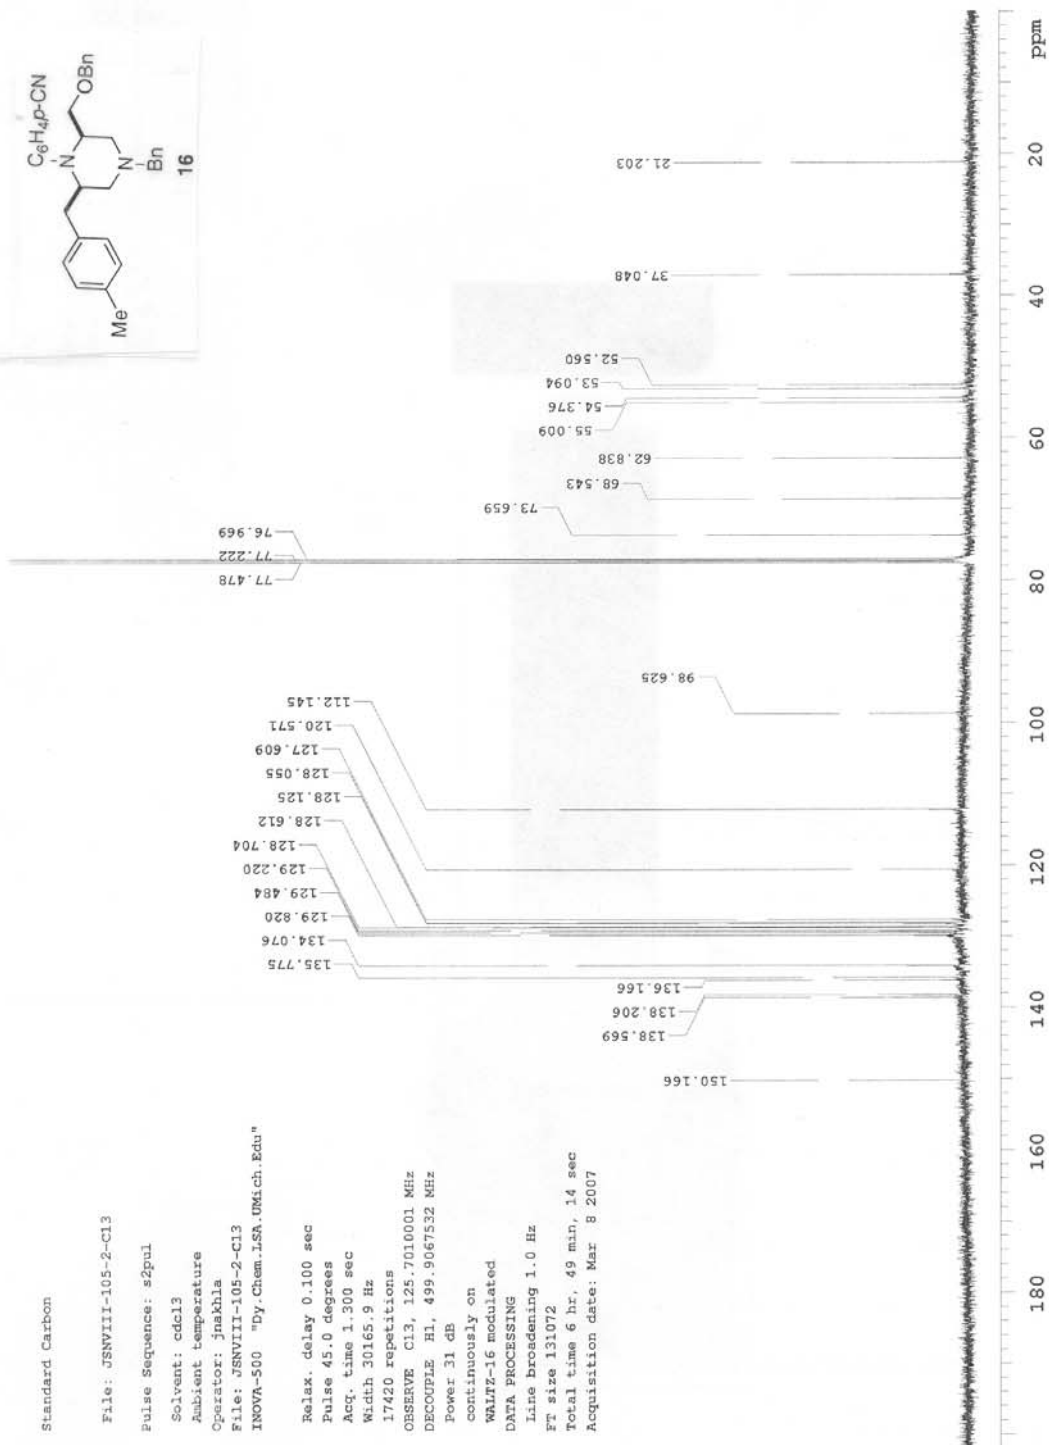

Data: C:\CLASS-VP\Enterprise\Projects\Default\Data\Nakhla Data\New Folder\JSNVIII-108-2AD2.dat

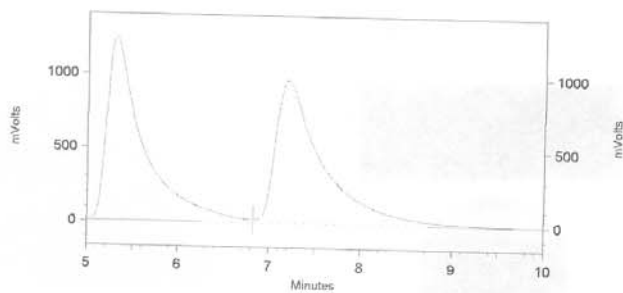

AD  
10% IPA/Hex  
1 mL/min

Detector 1 Ch2-254nm  
Results

| Retention Time | Area     | Area Percent |
|----------------|----------|--------------|
| 5.308          | 5057835  | 48.766       |
| 7.192          | 5313778  | 51.234       |
| Totals         | 10371613 | 100.000      |

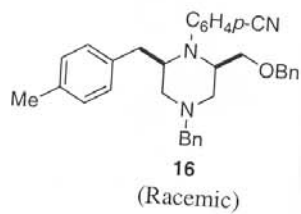

AD  
10% IPA/Hex  
1 mL/min



Data: C:\CLASS-VP\Enterprise\Projects\Default\Data\Nakhla Data\New  
Folder\JSNVIII-105-2AD.dat

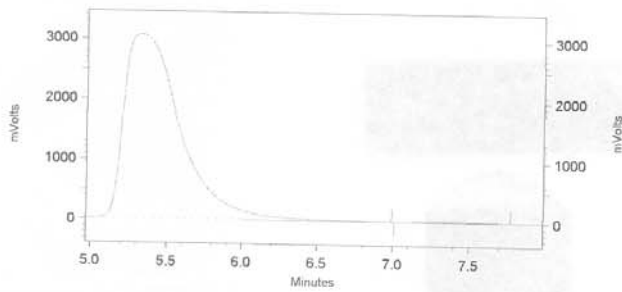

AD  
10% IPA/Hex  
1 mL/min

Detector 1 Ch2-254nm  
Results

| Retention Time | Area     | Area Percent |
|----------------|----------|--------------|
| 5.317          | 16510652 | 98.561       |
| 7.408          | 241039   | 1.439        |
| Totals         | 16751691 | 100.000      |

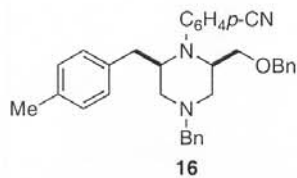

AD  
10% IPA/Hex  
1 mL/min

Standard Proton

File: JSNVIII-106-2-H1

Pulse Sequence: s2pul

Solvent: cdcl3

Ambient temperature

Operator: jnakhla

File: JSNVIII-106-2-H1

INOVA-500 "Md.Chem.LSA,UMich.Edu"

Relax. delay 0.100 sec

Pulse 45.0 degrees

Acq. time 3.000 sec

Width 7998.4 Hz

8 repetitions

OBSERVE H1, 499.9042609 MHz

DATA PROCESSING

Line broadening 0.2 Hz

Ft size 65536

Total time 0 min, 31 sec

Acquisition date: Mar 7 2007

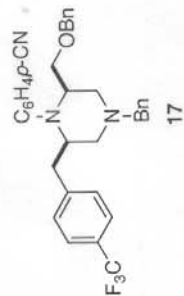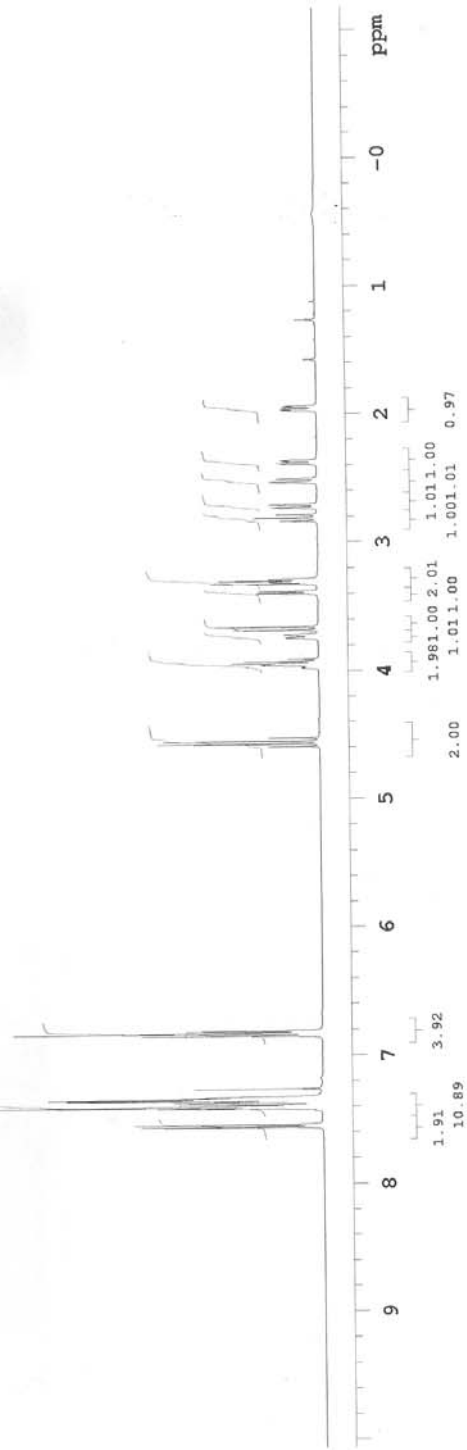

Standard Carbon

File: JSNVIII-106-2-C13

Pulse Sequence: s2pul

Solvent: cdcl3

Ambient temperature

Operator: jrnathla

File: JSNVIII-106-2-C13

INOVA-500 "Md.Chem.LSA.UMi.Ch.Edu"

Relax. delay 0.100 sec

Pulse 45.0 degrees

Acq. time 1.300 sec

Width 30165.9 Hz

1232 repetitions

OBSERVE C13, 125.7010010 MHz

DECOUPLE H1, 499.9067532 MHz

Power 31 dB

continuously on

WALTZ-16 modulated

DATA PROCESSING

Line broadening 1.0 Hz

FT size 131072

Total time 28 min, 59 sec

Acquisition date: Mar 7 2007

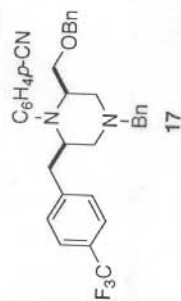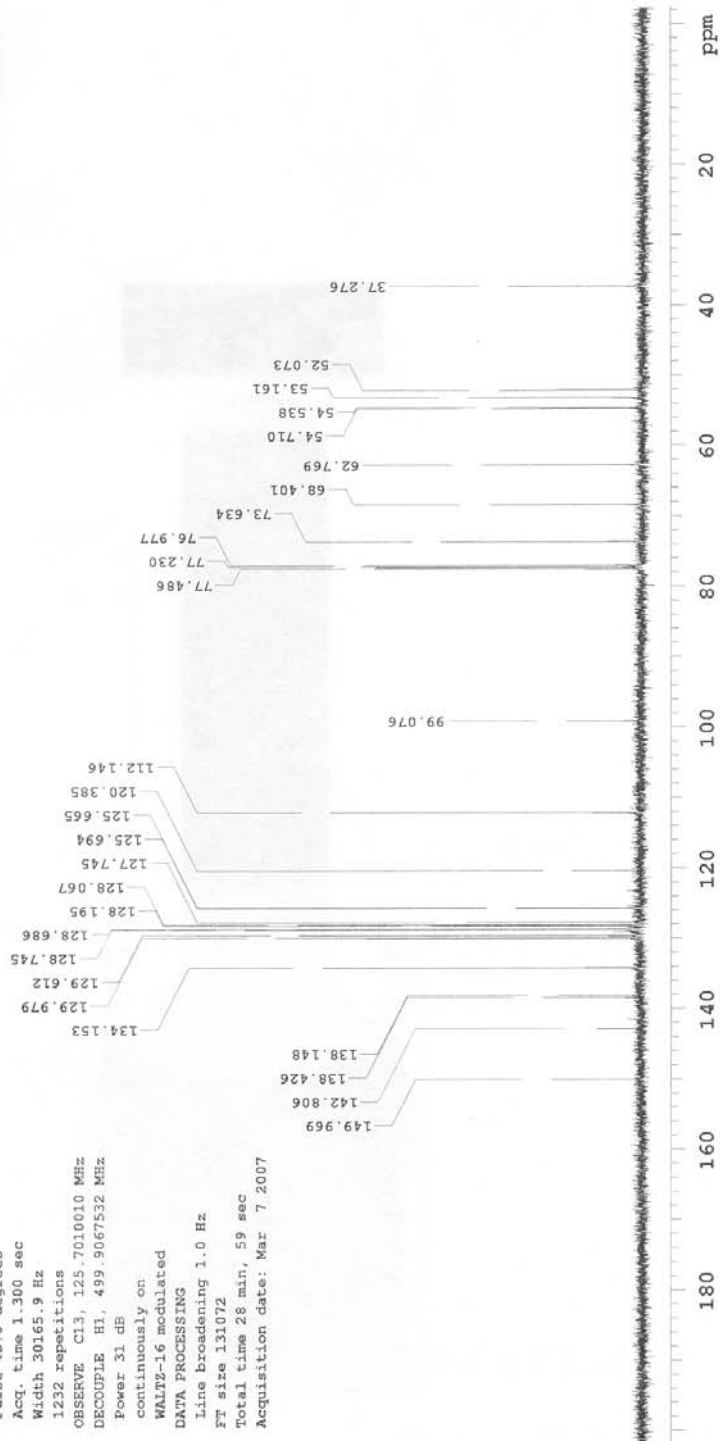

Standard Proton

File: JSNVIII-106-2-COSYinCH3CN

Pulse Sequence: gCOSY

Solvent: c6d6

Ambient temperature

Operator: jnakhla

File: JSNVIII-106-2-COSYinCH3CN

INOVA-500 "Md.Chem.USA.UMich.Edu"

Relax. delay 1.301 sec

Acq. time 0.128 sec

Width 7998.4 Hz

2D Width 7998.4 Hz

2 repetitions

200 increments

OBSERVE H1, 499.9070426 MHz

DATA PROCESSING

Sine bell 0.064 sec

F1 DATA PROCESSING

Sine bell 0.050 sec

FF size 4096 x 4096

Total time 10 min, 4 sec

Acquisition date: Mar 8 2007

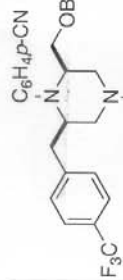

17

$^1\text{H}, ^1\text{H-COSY}$

F2  
(ppm)

1

2

3

4

5

6

7

8

F1 (ppm)

2

3

4

5

6

7

8

Standard Proton

File: JSNVIII-106-2-HSQC

Pulse Sequence: gHSQC

Solvent: cdcl3

Ambient temperature

Operator: jmakhla

File: JSNVIII-106-2-HSQC

INOVA-500 "Md.Chem.USA,UMi.ch.Edu"

Relax. delay 1.301 sec

Acq. time 0.199 sec

Width 7998.4 Hz

2D Width 21367.5 Hz

4 repetitions

2 x 256 increments

OBSERVE H1, 499.9042609 MHz

DECOUPLE C13, 125.7104522 MHz

Power 40 dB

on during acquisition

off during delay

W40 id modulated

DATA PROCESSING

Gauss apodization 0.092 sec

F1 DATA PROCESSING

Gauss apodization 0.011 sec

FT size 8192 x 2048

Total time 53 min, 53 sec

Acquisition date: Mar 8 2007

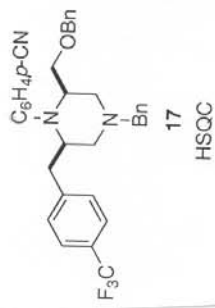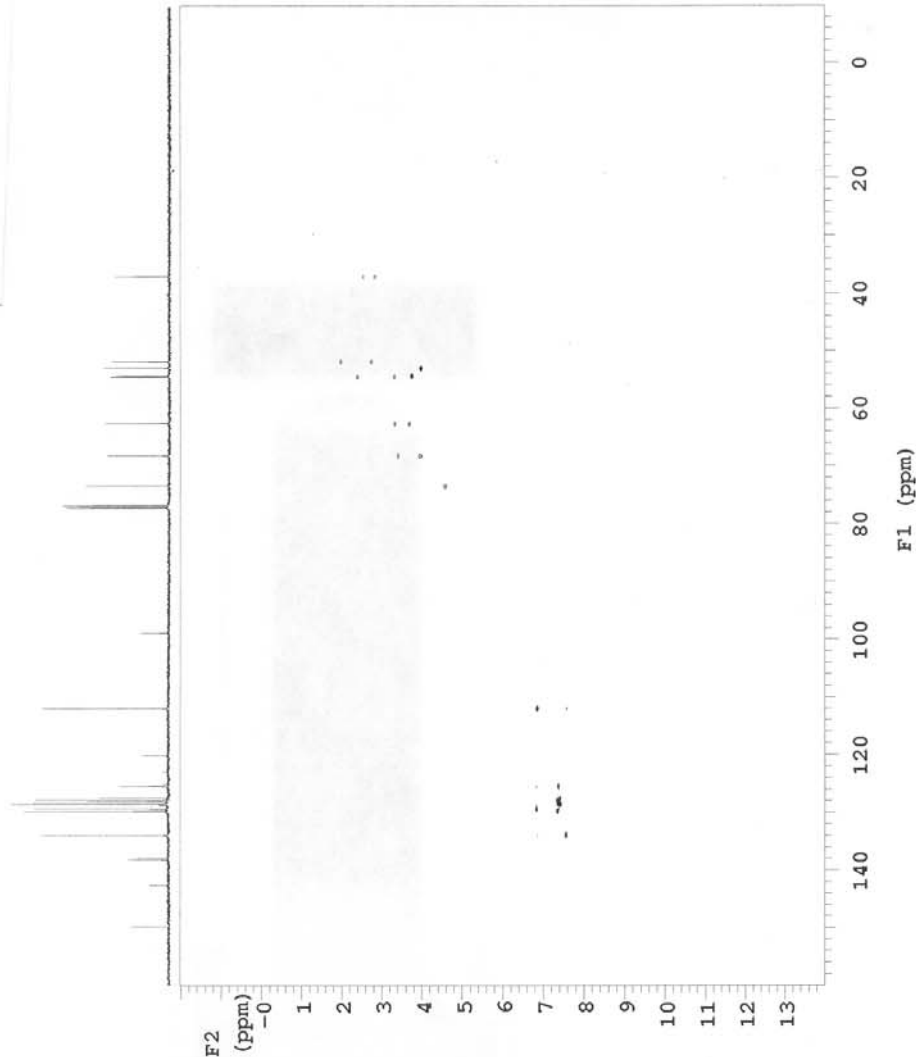

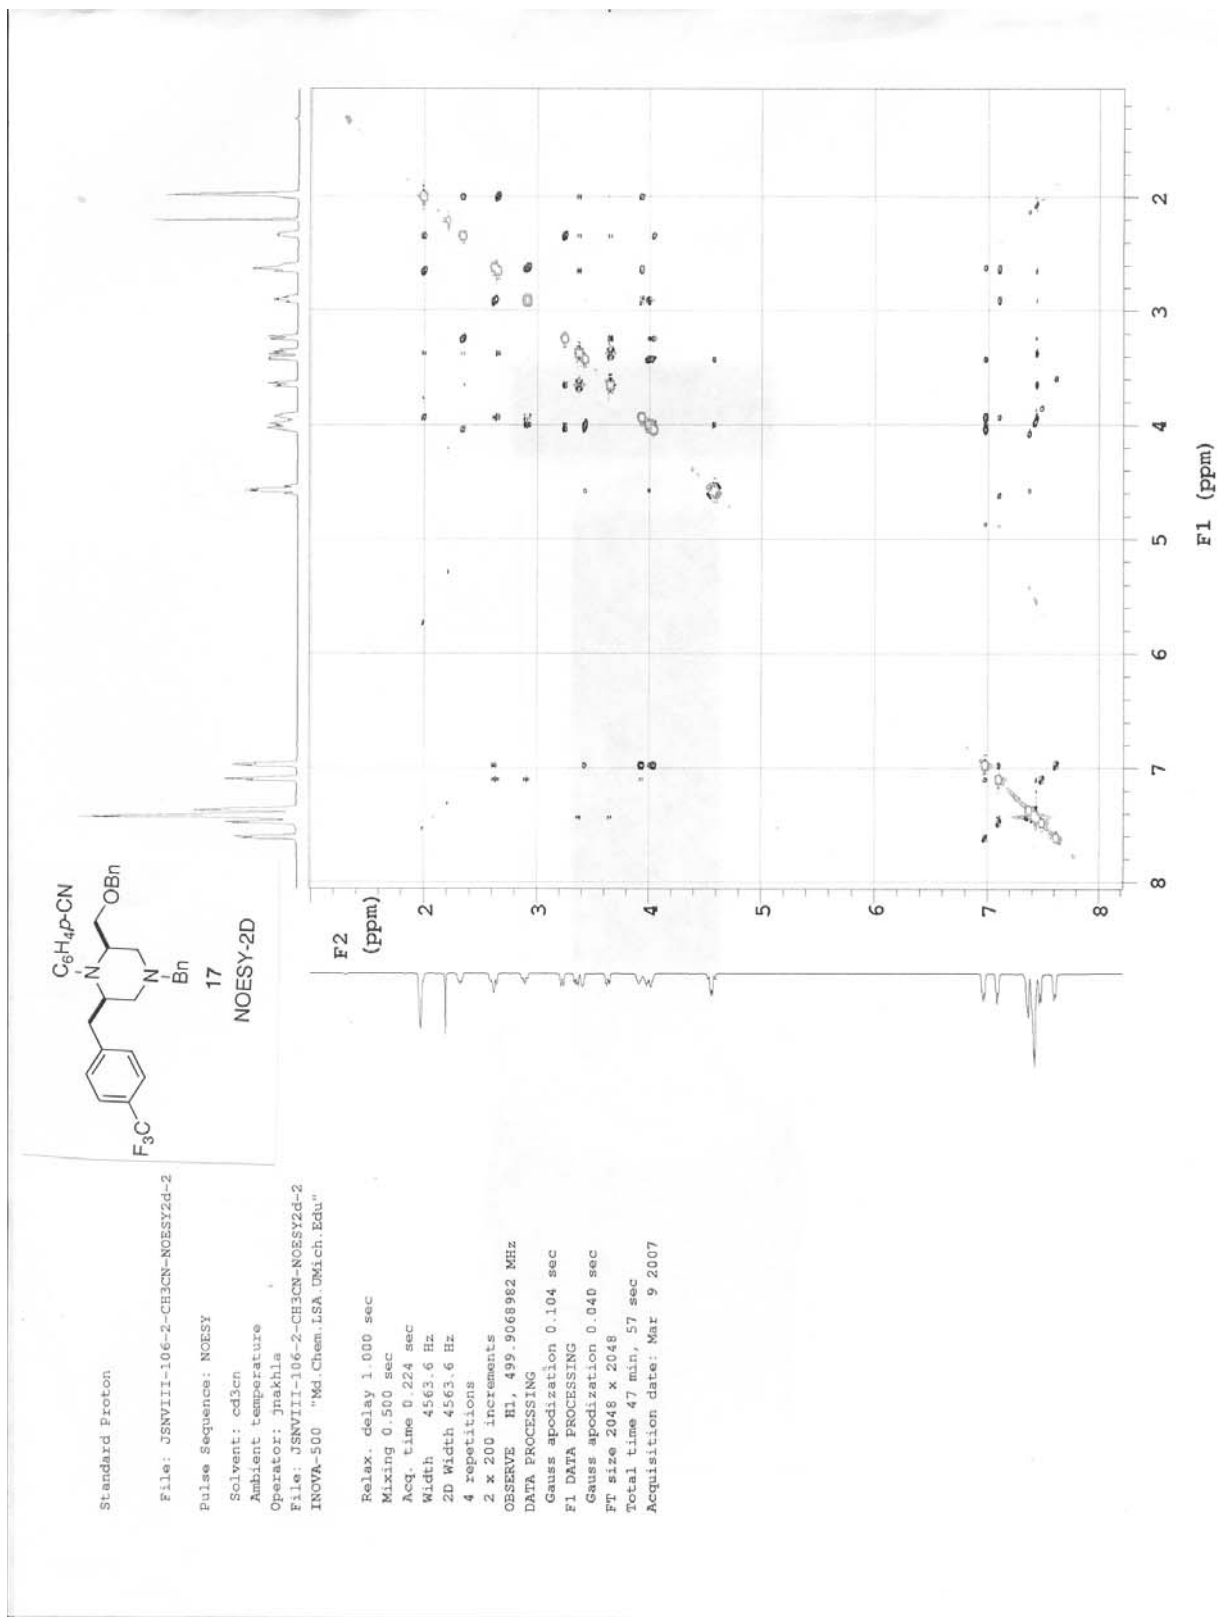

Data: C:\CLASS-VP\Enterprise\Projects\Default\Data\Nakhla Data\New  
Folder\JSNVIII-109-2-AD.dat

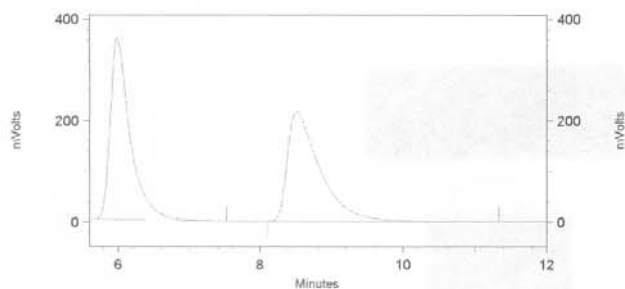

AD  
10% IPA/Hex  
1 mL/min

Detector 1 Ch2-254nm  
Results

| Retention Time | Area     | Area Percent |
|----------------|----------|--------------|
| 5.983          | 6965137  | 50.378       |
| 8.508          | 6860614  | 49.622       |
| Totals         | 13825751 | 100.000      |

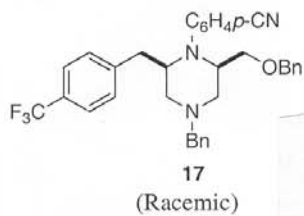

AD  
10% IPA/Hex  
1 mL/min

Data: C:\CLASS-VP\Enterprise\Projects\Default\Data\Nakhla Data\New Folder\JSNVIII-106-2-AD.dat

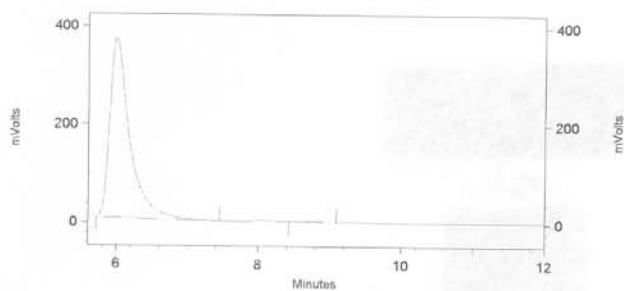

AD  
10% IPA/Hex  
1 mL/min

Detector 1 Ch2-254nm

Results

| Retention Time | Area    | Area Percent |
|----------------|---------|--------------|
| 5.992          | 7074994 | 99.686       |
| 8.675          | 22274   | 0.314        |
| Totals         | 7097268 | 100.000      |

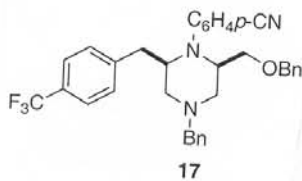

AD  
10% IPA/Hex  
1 mL/min



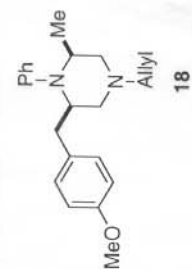

File: JSNVIII-152-2-reaction2-major1diastereomer

Pulse Sequence: s2pul

Solvent: cdcl3

Ambient temperature

Operator: jnakhle

File: JSNVIII-152-2-reaction2-major1diastereomer

INOVA-500 "MD.Chem.USA.DMICH.EDU"

Relax. delay 0.100 sec

Pulse 45.0 degrees

Acq. time 3.000 sec

Width 7998.4 Hz

4 repetitions

OBSERVE H1, 499.9042609 MHz

DATA PROCESSING

Line broadening 0.2 Hz

FT size 65536

Total time 0 min, 18 sec

Acquisition date: May 2 2007

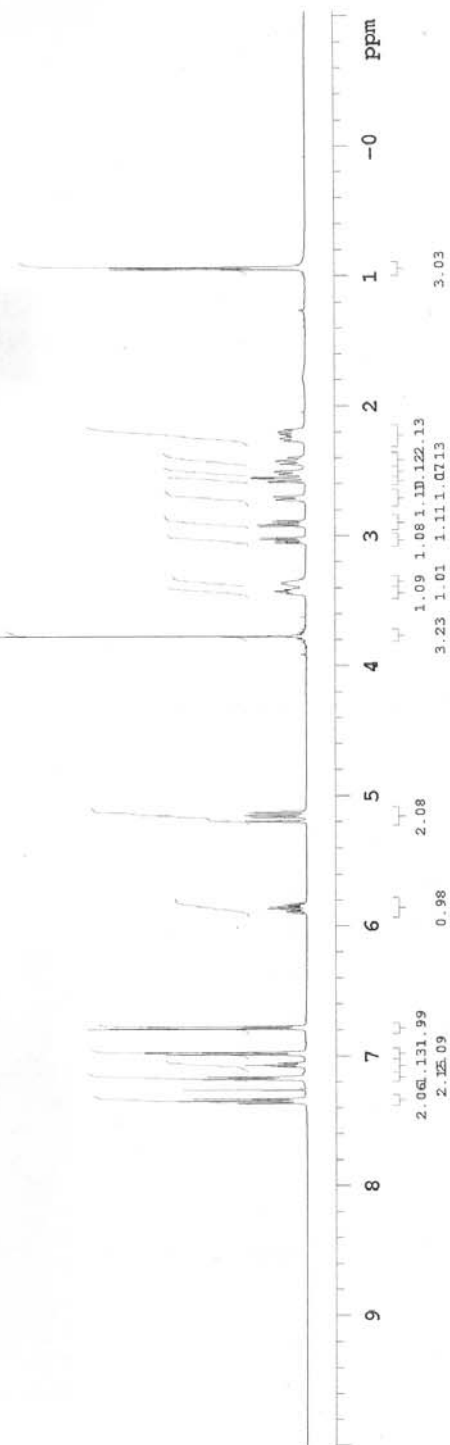

Std Carbon

File: JSNVIII-152-2-C13

Pulse Sequence: s2pul

Solvent: cdcl3

Ambient temperature

Operator: jhakhia

File: JSNVIII-152-2-C13

INOVA-400 "Md.Chem.LSA,DMich.Edu"

Relax. delay 0.100 sec

Pulse 45.0 degrees

Acq. time 1.300 sec

Width 24140.0 Hz

1140 repetitions

OBSERVE C13, 100.5712453 MHz

DECOUPLE H1, 399.9669644 MHz

Power 39 dB

continuously on

WALTZ-16 modulated

DATA PROCESSING

Line broadening 0.8 Hz

FT size 65536

Total time 26 min, 46 sec

Acquisition date: May 2 2007

| INDEX | FREQUENCY PPM | HEIGHT  |
|-------|---------------|---------|
| 1     | 15896.543     | 158.063 |
| 2     | 15001.459     | 149.163 |
| 3     | 13598.056     | 135.208 |
| 4     | 13259.913     | 131.846 |
| 5     | 13098.577     | 130.242 |
| 6     | 13010.173     | 129.363 |
| 7     | 12392.823     | 123.224 |
| 8     | 11881.557     | 118.141 |
| 9     | 11450.591     | 113.856 |
| 10    | 7798.795      | 77.545  |
| 11    | 7767.117      | 77.230  |
| 12    | 7734.703      | 76.908  |
| 13    | 6228.162      | 61.928  |
| 14    | 6084.507      | 60.499  |
| 15    | 6073.456      | 60.390  |
| 16    | 5776.568      | 57.438  |
| 17    | 5571.767      | 55.401  |
| 18    | 5453.896      | 54.229  |
| 19    | 3811.803      | 37.902  |
| 20    | 1894.187      | 18.834  |

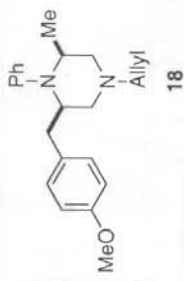

18

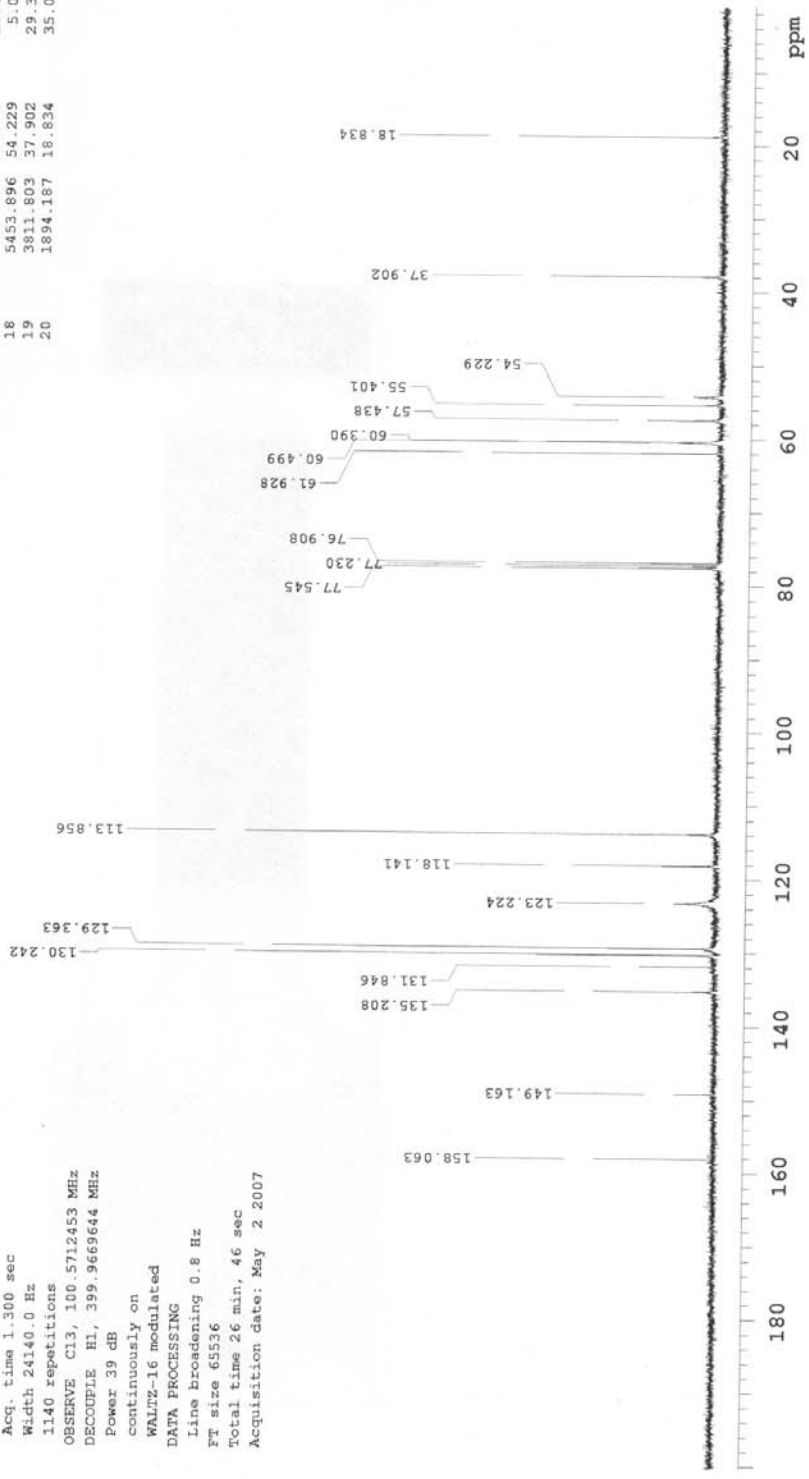

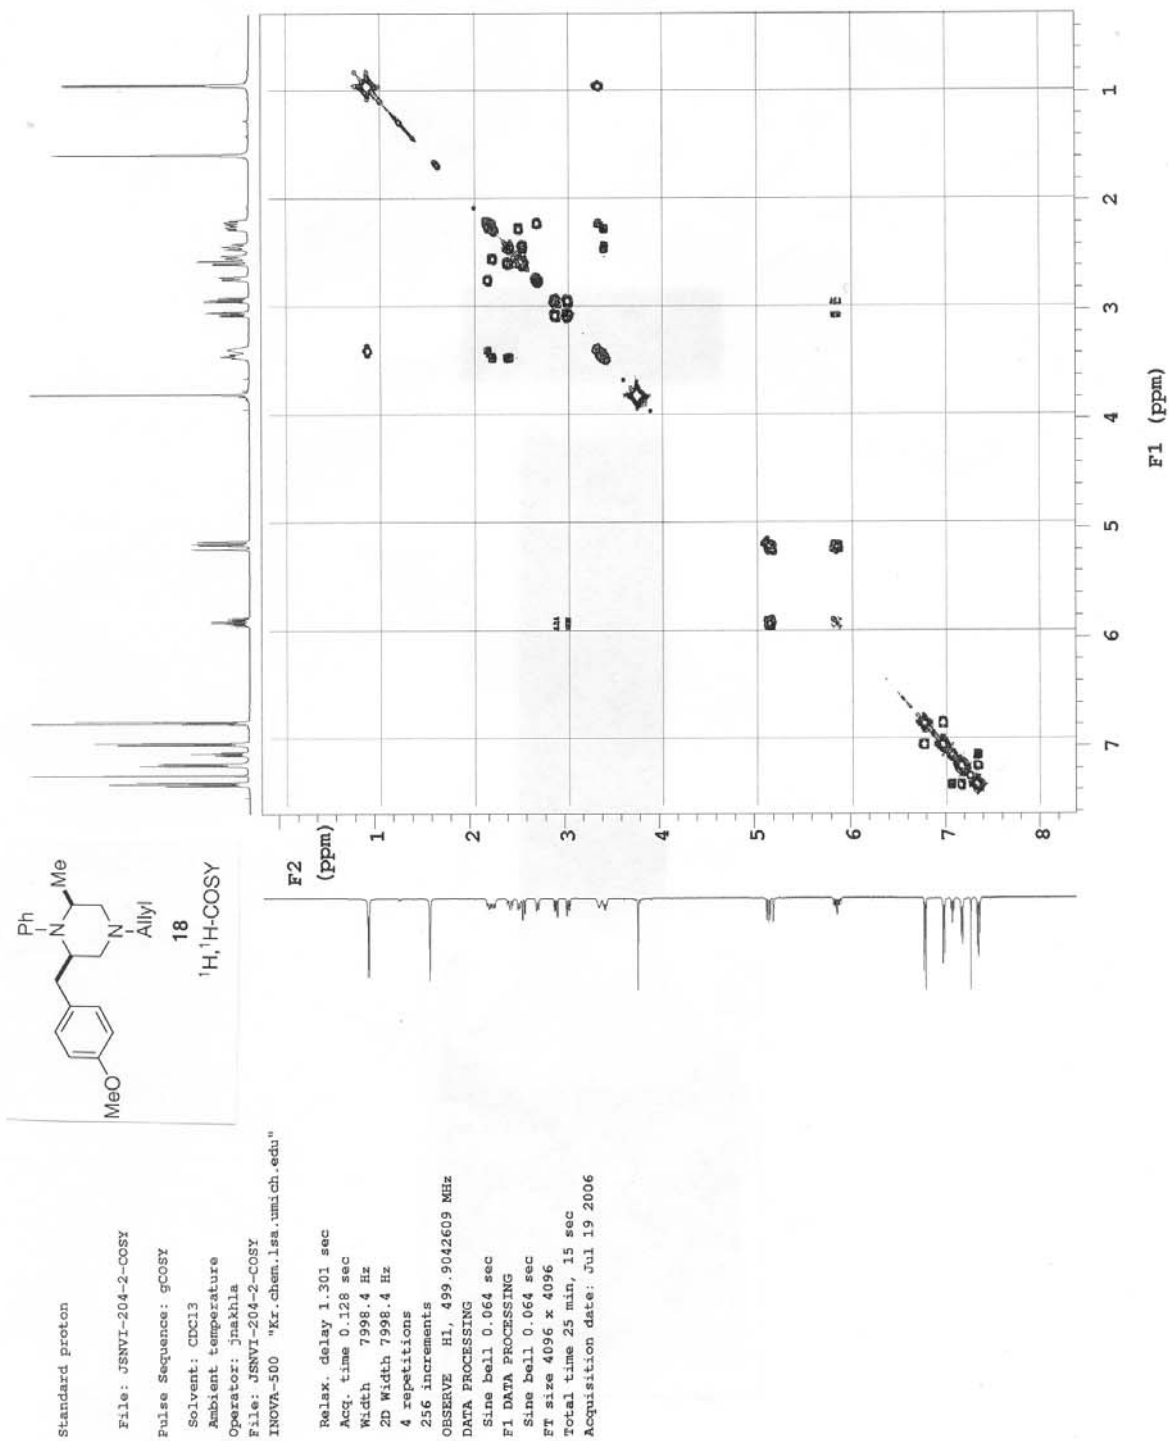

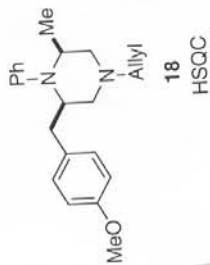

File: JSNVI-204-2-HSQC

Pulse Sequence: gHSQC

Solvent: CDCl3

Ambient temperature

Operator: jnakkla

File: JSNVI-204-2-HSQC

INOVA-500 "Kr.chem.isa.umich.edu"

Relax. delay 1.301 sec

Acq. time 0.199 sec

Width 4282.0 Hz

2D Width 21367.5 Hz

4 repetitions

2 x 200 increments

OBSERVE H1, 499.9042607 MHz

DECOUPLE C13, 125.7104522 MHz

Power 41 dB

on during acquisition

off during delay

W40\_id modulated

DATA PROCESSING

Gauss apodization 0.092 sec

F1 DATA PROCESSING

Gauss apodization 0.009 sec

FT size 4096 x 2048

Total time 42 min, 15 sec

Acquisition date: Aug 2 2006

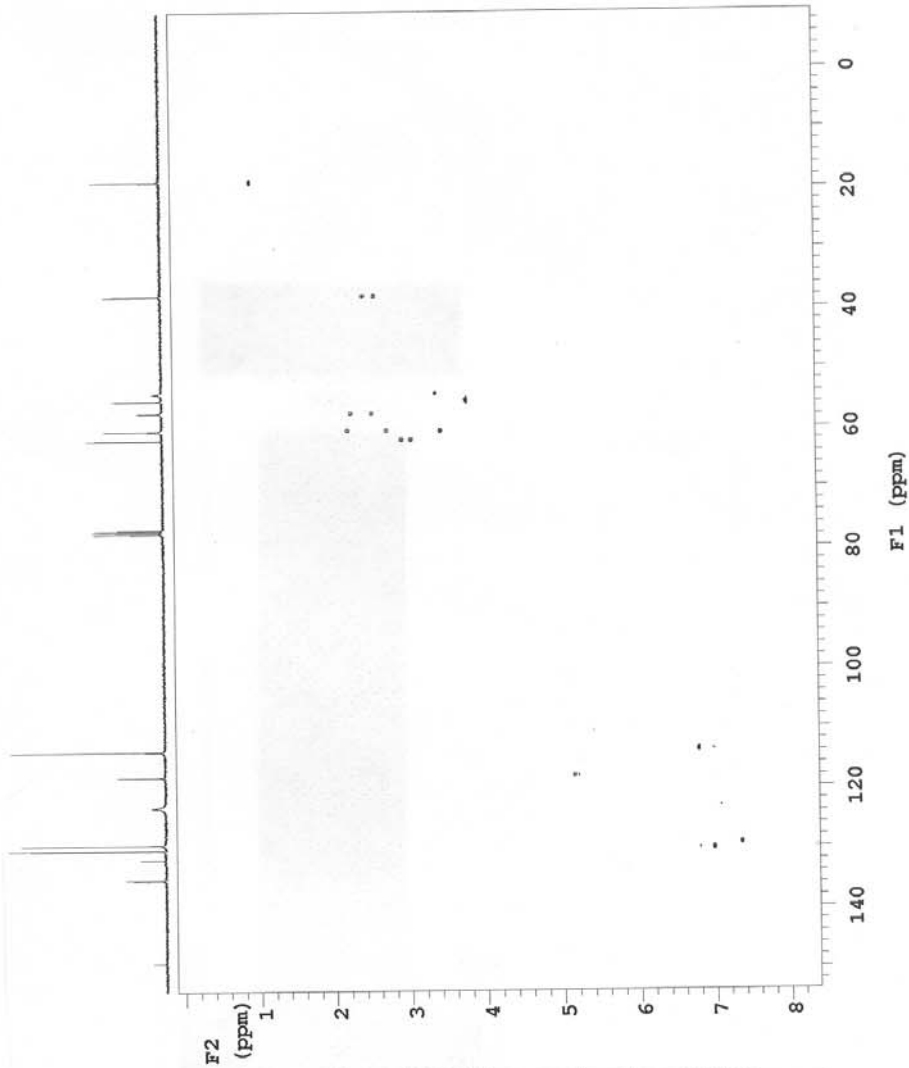

Standard proton

File: JENVI-204-2-NOESY2D

Pulse Sequence: NOESY

Solvent: CDCl3

Ambient temperature

Operator: Jnakhla

File: JENVI-204-2-NOESY2D  
INOVA-500 "Kr.chem.1sa.umich.edu"

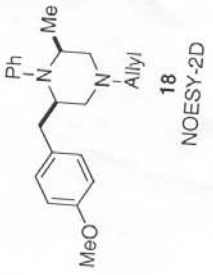

Relax. delay 1.000 sec  
 Mixing 0.400 sec  
 Acq. time 0.128 sec  
 Width 7998.4 Hz  
 2D Width 7998.4 Hz  
 4 repetitions  
 2 x 128 increments  
 OBSERVE H1, 499.9042537 MHz  
 DATA PROCESSING  
 Gauss apodization 0.059 sec  
 F1 DATA PROCESSING  
 Gauss apodization 0.030 sec  
 FT size 2048 x 2048  
 Total time 27 min, 20 sec  
 Acquisition date: Jul 31 2006

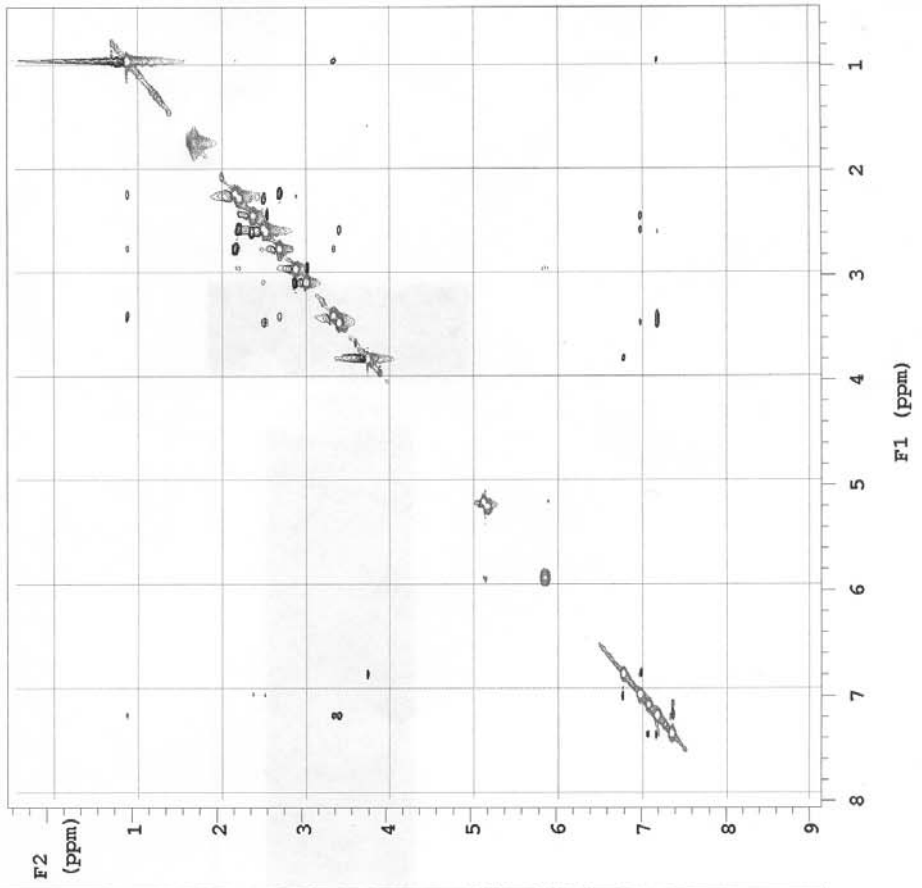

Data: C:\CLASS-VP\Enterprise\Projects\Default\Data\Nakhla Data\New Folder\JSNVIII-127-2-rachexODH3.dat

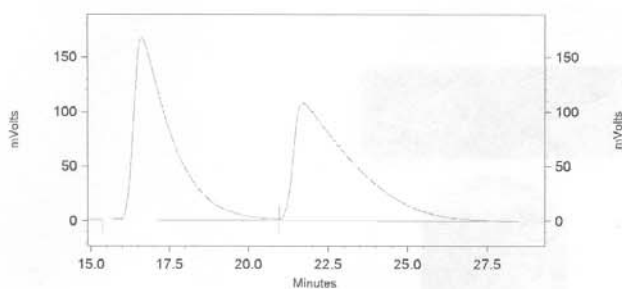

OD-H  
100% Hex  
1 mL/min

Detector 1 Ch2-254nm  
Results

| Retention Time | Area     | Area Percent |
|----------------|----------|--------------|
| 16.600         | 13692114 | 49.687       |
| 21.708         | 13864520 | 50.313       |
| Totals         | 27556634 | 100.000      |

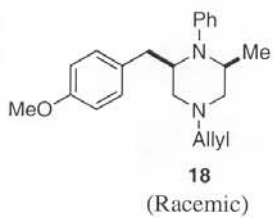

OD-H  
100% Hex  
1 mL/min

Data: C:\CLASS-VP\Enterprise\Projects\Default\Data\Nakhla Data\New Folder\JSNVIII-152-2-ODHhexanes.dat

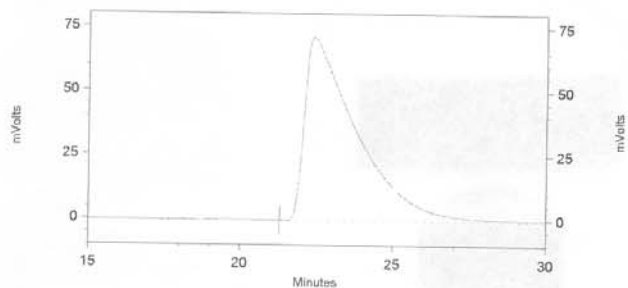

OD-H  
100% Hex  
1 mL/min

Detector 1 Ch2-254nm  
Results

| Retention Time | Area    | Area Percent |
|----------------|---------|--------------|
| 19.750         | 30013   | 0.351        |
| 22.392         | 8511817 | 99.649       |
| Totals         | 8541830 | 100.000      |

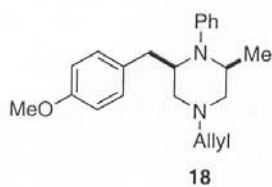

OD-H  
100% Hex  
1 mL/min

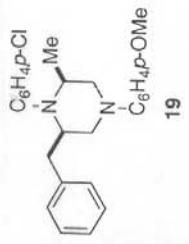

File: JSNVIII-146-2-smallerscale

Pulse Sequence: s2pul

Solvent: cdcl3

Ambient temperature

Operator: jnakhla

File: JSNVIII-146-2-smallerscale

INOVA-500 "Dy.Chem.LSA,UMich.Edu"

Relax. delay 0.100 sec

Pulse 45.0 degrees

Acq. time 3.000 sec

Width 7998.4 Hz

44 repetitions

OBSERVE H1, 499.9042614 MHz

DATA PROCESSING

Line broadening 0.2 Hz

FT size 65536

Total time 2 min, 23 sec

Acquisition date: Apr 27 2007

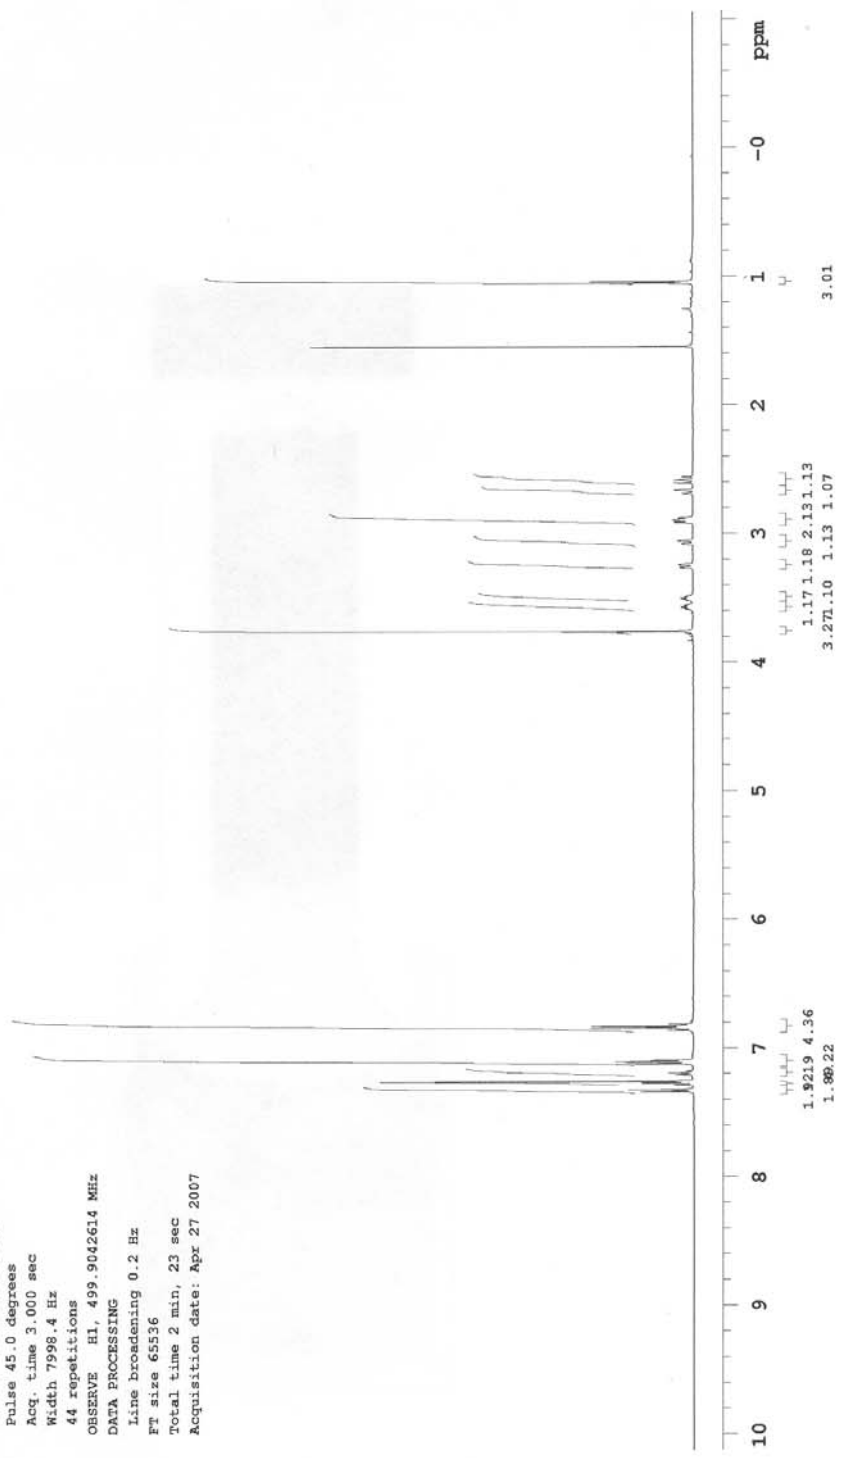



Standard Carbon

File: JSNVIII-146-2-C13

Pulse Sequence: szpul

Solvent: cdcl3

Ambient temperature

Operator: jnakhla

File: JSNVIII-146-2-C13

INOVA-500 "Md.Chem.LSA.UMich.Edu"

Relax. delay 0.100 sec  
 Pulse 45.0 degrees  
 Acq. time 1.300 sec  
 Width 30165.9 Hz  
 980 repetitions  
 OBSERVE C13, 125.7009991 MHz  
 DECOUPLE H1, 499.9067532 MHz  
 Power 31 dB  
 continuously on  
 WALTZ-16 modulated  
 DATA PROCESSING  
 Line broadening 1.0 Hz  
 FT size 131072  
 Total time 23 min, 4 sec  
 Acquisition date: May 10 2007

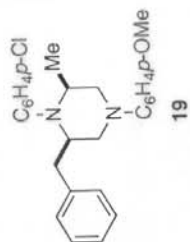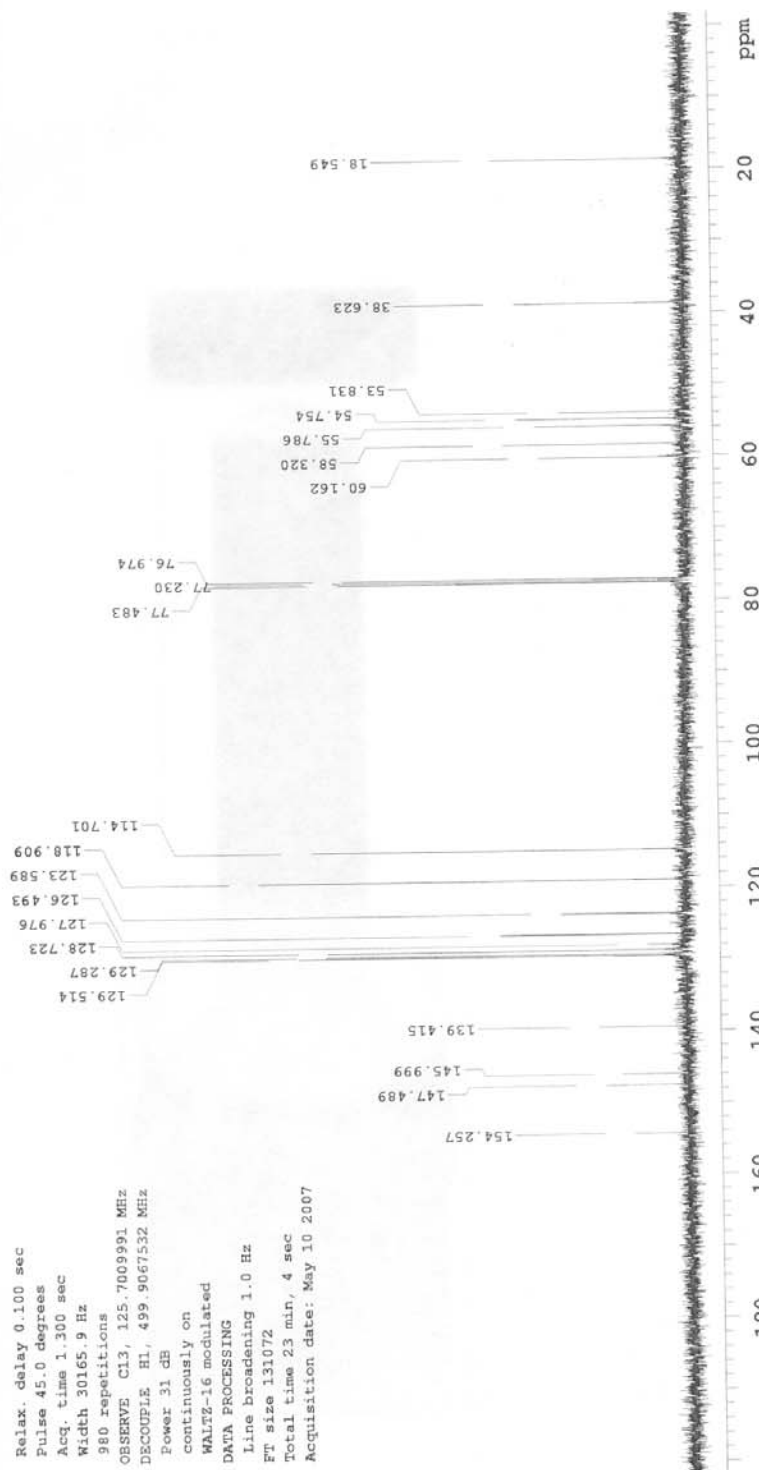

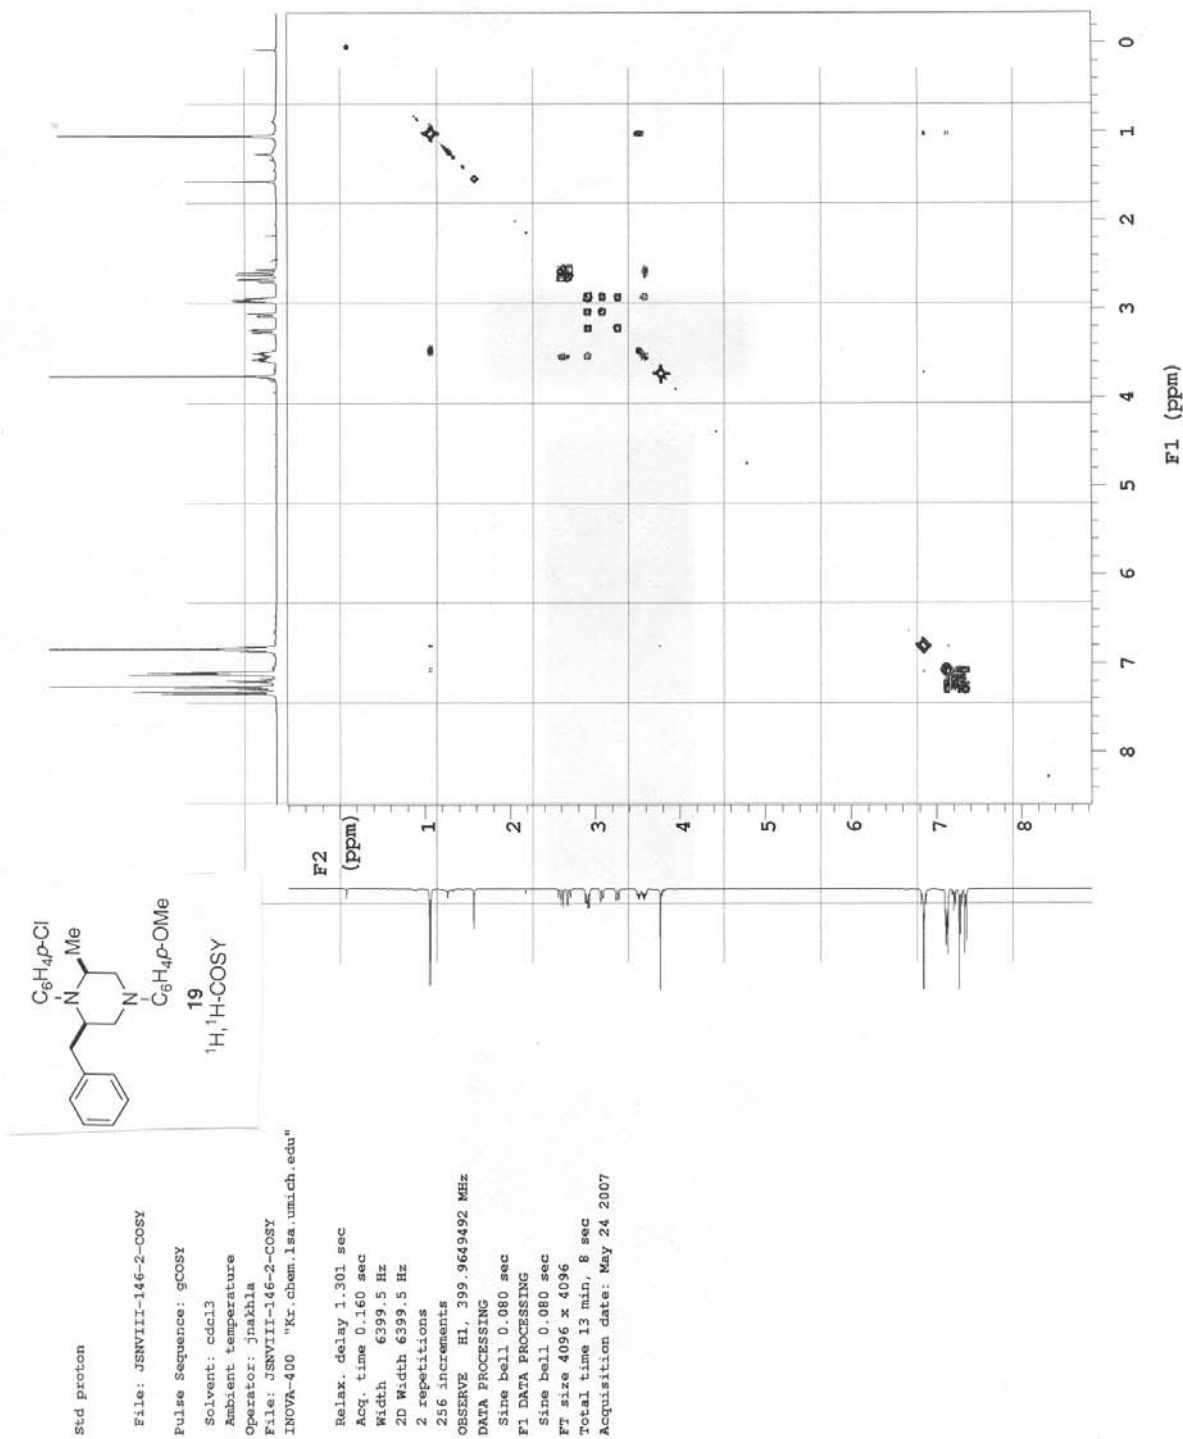

Std proton

File: JSNVIII-146-2-COSY

Pulse Sequence: gCOSY

Solvent: cdcl3

Ambient temperature

Operator: jnakhla

File: JSNVIII-146-2-COSY

INOVA-400 "Kr.chem.lsa.umich.edu"

Relax. delay 1.301 sec

Acq. time 0.160 sec

Width 6399.5 Hz

2D Width 6399.5 Hz

2 repetitions

256 increments

OBSERVE H1, 399.9649492 MHz

DATA PROCESSING

Sine bell 0.080 sec

F1 DATA PROCESSING

Sine bell 0.080 sec

FT size 4096 x 4096

Total time 13 min, 8 sec

Acquisition date: May 24, 2007

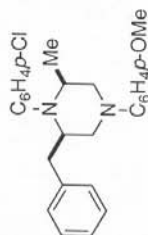<sup>1</sup>H, <sup>1</sup>H-COSY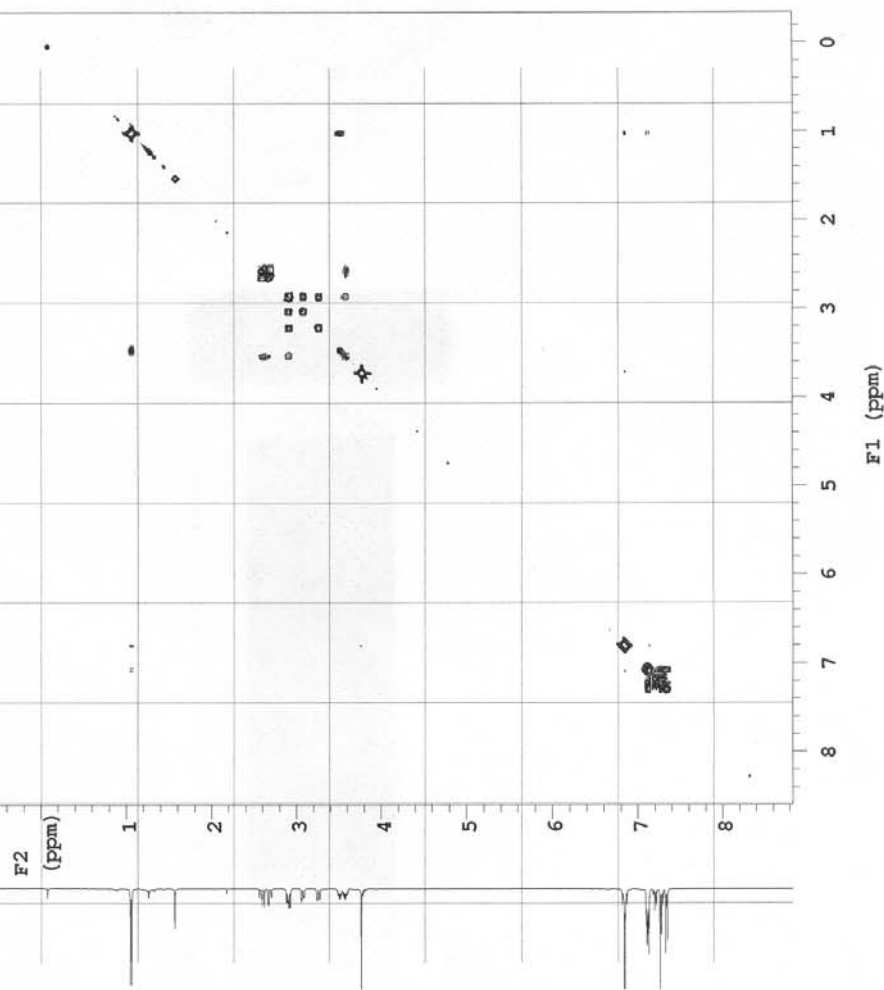

Data: C:\CLASS-VP\Enterprise\Projects\Default\Data\Nakhla Data\New Folder\JSNVIII-139-2-ODH4a.dat

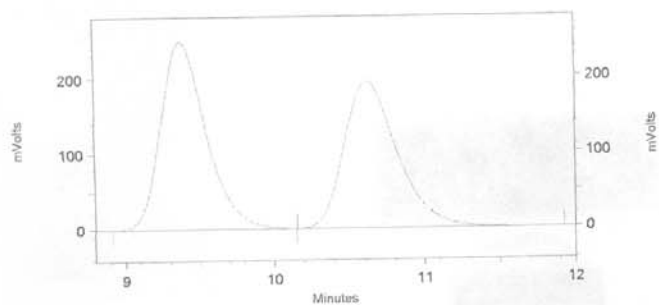

OD-H  
1% IPA/Hex  
0.5 mL/min

Detector 1 Ch2-254nm  
Results

| Retention Time | Area     | Area Percent |
|----------------|----------|--------------|
| 9.375          | 5279371  | 52.511       |
| 10.617         | 4774524  | 47.489       |
| Totals         | 10053895 | 100.000      |

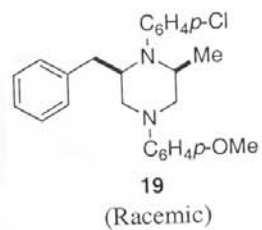

OD-H  
1% IPA/Hex  
0.5 mL/min

Data: C:\CLASS-VP\Enterprise\Projects\Default\Data\Nakhla Data\New Folder\JSNVIII-146-2.dat

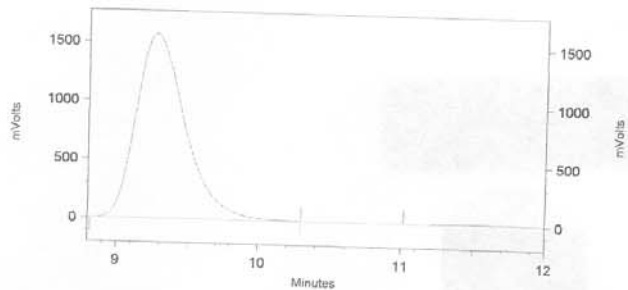

OD-H  
1% IPA/Hex  
0.5 mL/min

Detector 1 Ch2-254nm  
Results

| Retention Time | Area     | Area Percent |
|----------------|----------|--------------|
| 9.267          | 37419978 | 99.808       |
| 10.300         | 71949    | 0.192        |
| Totals         | 37491927 | 100.000      |

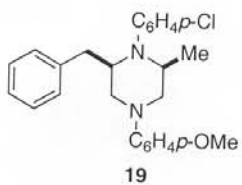

OD-H  
1% IPA/Hex  
0.5 mL/min

Std proton

File: JSNVIII-152-2-sp2-2H1

Pulse Sequence: s2pul

Solvent: cdcl3

Ambient temperature

Operator: jpakhla

File: JSNVIII-152-2-sp2-2H1

INOVA-400 "Dy.Chem.LSA.DMach.Edu"

Relax. delay 0.500 sec

Pulse 45.0 degrees

Acq. time 3.000 sec

Width 6399.5 Hz

4 repetitions

OBSERVE H1, 399.9649482 MHz

DATA PROCESSING

Line broadening 0.2 Hz

FT size 65536

Total time 0 min, 21 sec

Acquisition date: May 1 2007

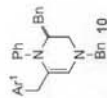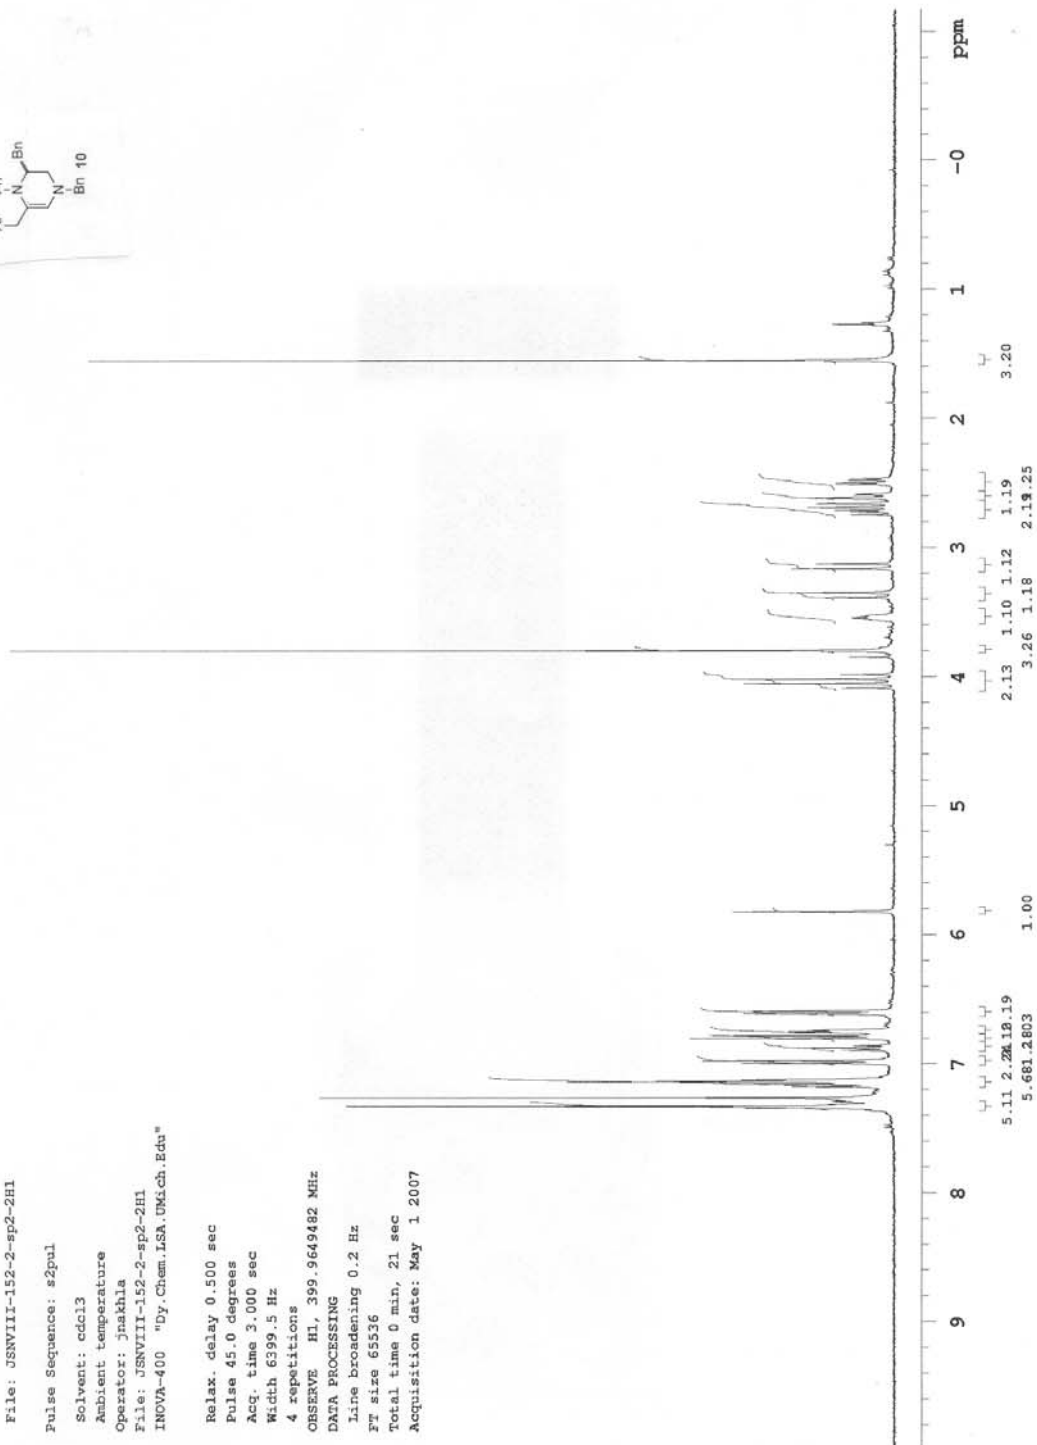

Std proton

File: JSNVIII-152-2-sp2-COSY

Pulse Sequence: gCOSY

Solvent: cdcl3

Ambient temperature

Operator: jhakkla

File: JSNVIII-152-2-sp2-COSY

INOVA-400 "Md.Chem.LSA.UMich.Edu"

Relax. delay 1.301 sec

Acq. time 0.160 sec

Width 6399.5 Hz

2D Width 6399.5 Hz

2 repetitions

200 increments

OBSERVE F1, 399.9649496 MHz

DATA PROCESSING

Sq. sine bell 0.080 sec

F1 DATA PROCESSING

Sq. sine bell 0.031 sec

FT size 2048 x 2048

Total time 10 min, 19 sec

Acquisition date: May 1 2007

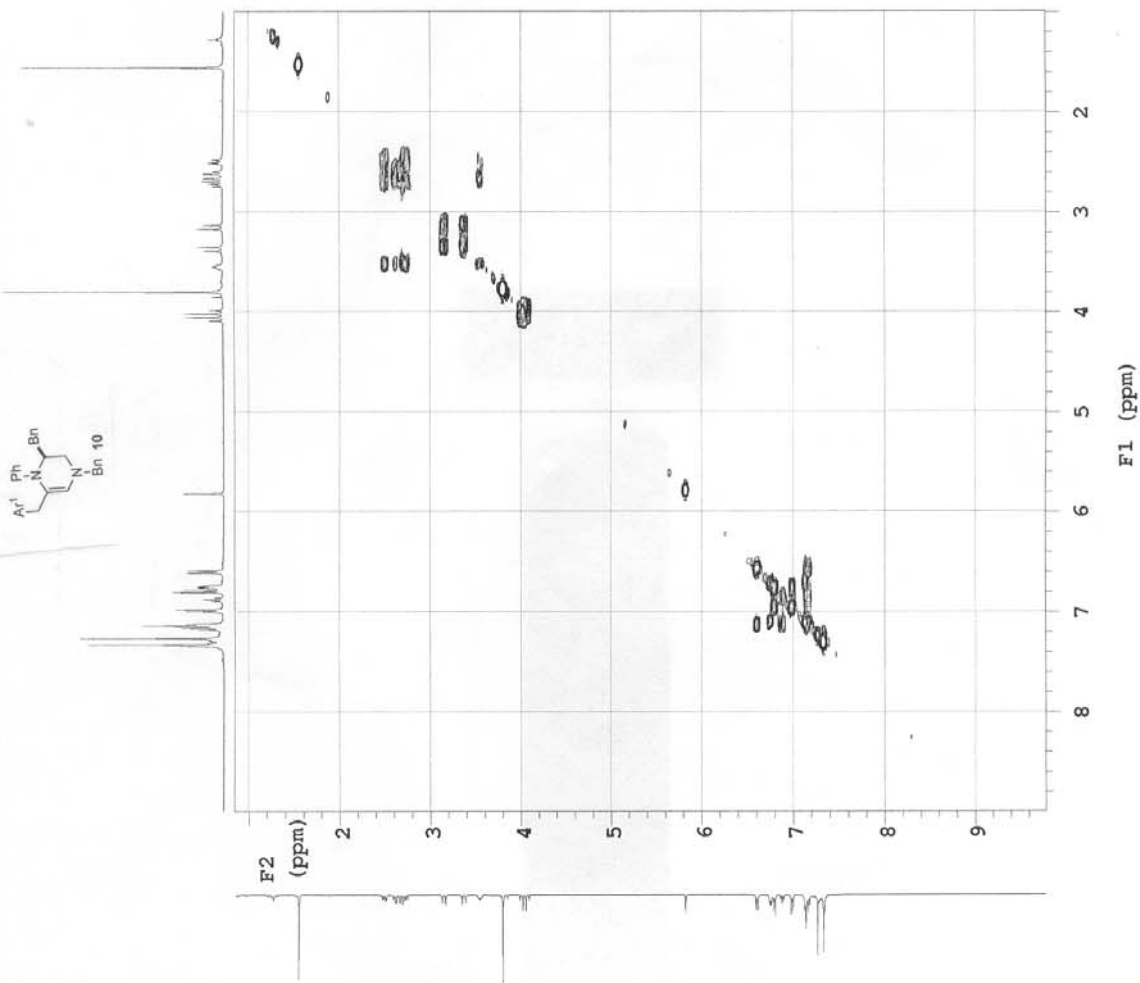

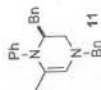

File: J5NVIII-151-2-spl-H1

Pulse Sequence: s2pul

Solvent: cdcl3

Ambient temperature

Operator: jnakhla

File: J5NVIII-151-2-spl-H1

INOVA-500 "Dy. Chem. LSA, UMich. Edu"

Relax. delay 0.100 sec

Pulse 45.0 degrees

Acq. time 3.000 sec

Width 7998.4 Hz

4 repetitions

OBSERVE H1, 499.9042669 MHz

DATA PROCESSING

Line broadening 0.2 Hz

FT size 65536

Total time 0 min, 18 sec

Acquisition date: May 1 2007

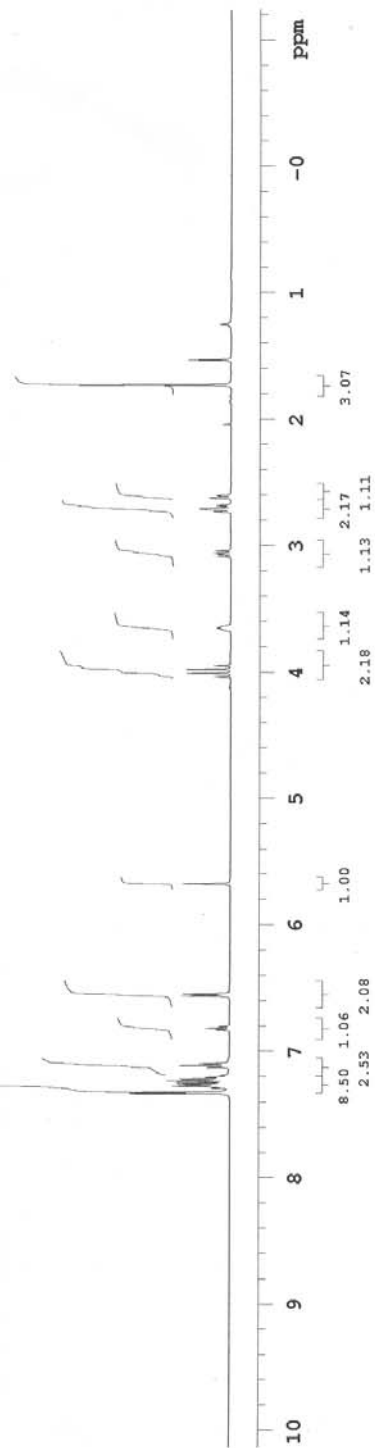



Standard Proton

File: Gcoosy

Pulse Sequence: gCOSY

Solvent: cdcl3

Ambient temperature

Operator: jprakhla

INOVA-500 "Sn.Chem.LSA.UMich.Edu"

Relax. delay 1.301 sec

Acq. time 0.206 sec

Width 4970.2 Hz

2D Width 4970.2 Hz

4 repetitions

256 increments

OBSERVE H1, 499.9042683 MHz

DATA PROCESSING

Sq. sine bell 0.103 sec

F1 DATA PROCESSING

Sq. sine bell 0.052 sec

FT size 2048 x 2048

Total time 26 min, 46 sec

Acquisition date: May 1 2007

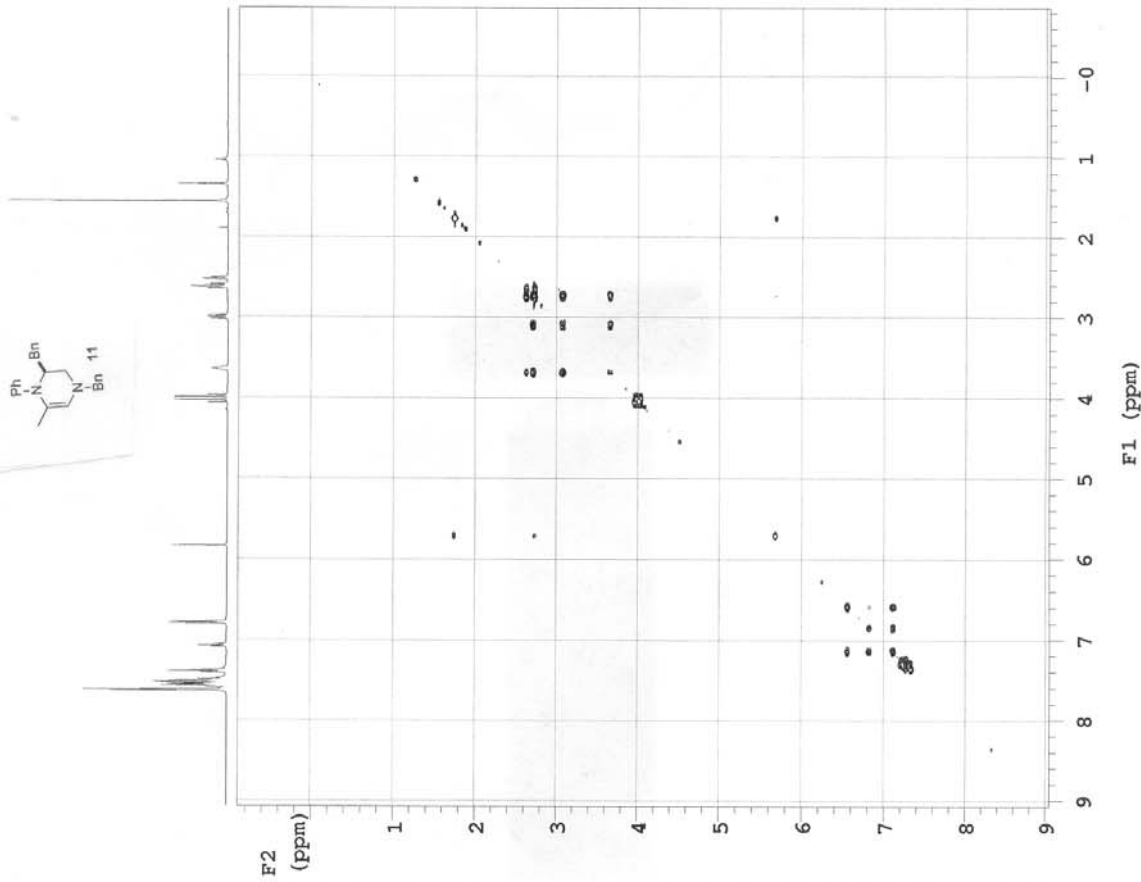

Supplement: NIHMS123260-supplement-3.pdf [file NIHMS123260-supplement-3.pdf]
